# Supplementary material
Source: PubMed Central journal article supplement (PMC6519111)

Supporting Information for  
Discovery and Elucidation of Counteranion Dependence in Photoredox Catalysis

Elliot P. Farney, Steven J. Chapman, Wesley B. Swords, Marco D. Torelli, Robert J. Hamers, Tehshik P. Yoon

|       |                                                                                                 |     |
|-------|-------------------------------------------------------------------------------------------------|-----|
| I.    | General Experimental Information for Synthetic Studies                                          | S1  |
| II.   | Synthesis of Polypyridyl Ru(II) Complexes                                                       | S1  |
| III.  | Visible Light Photocatalysis of Radical Cation [4+2] Diels–Alder Cycloadditions                 | S5  |
| IV.   | UV-Vis Spectra, Photoluminescence Spectra, and Chain Length Measurements                        | S5  |
| V.    | Cyclic Voltammetry Experiments                                                                  | S7  |
| VI.   | <sup>1</sup> H NMR Experiments                                                                  | S9  |
| VII.  | References                                                                                      | S12 |
| VIII. | <sup>1</sup> H, <sup>13</sup> C, <sup>19</sup> F, <sup>11</sup> B, and <sup>31</sup> P NMR data | S13 |

## I. General Experimental Information for Synthetic Studies

Dichloromethane (CH<sub>2</sub>Cl<sub>2</sub>), tetrahydrofuran, diethyl ether (Et<sub>2</sub>O), toluene, and acetonitrile (CH<sub>3</sub>CN) were dried by passage through columns of activated alumina. Ethylene glycol was used as received. Water was purified by a Milli-Q system (Millipore Corporation) to achieve a resistivity of 18.2 MΩ cm<sup>-1</sup> at 25 °C. Reagents were purchased from commercial sources unless otherwise noted. Chromatography was performed with Purasil 60 Å silica gel (230–400 mesh) or with neutral alumina (Aldrich product # 11028). High vacuum refers to a reduced pressure that was measured to be 60 mTorr or lower using a McLeod gauge. Anethole was purified by chromatography on silica gel (hexanes: EtOAc = 20:1) and was subsequently submitted to fractional distillation under high vacuum at 95 °C. Purified anethole was stored at room temperature in a vial wrapped in aluminum foil. Isoprene was fractionally distilled from CaH<sub>2</sub> under N<sub>2</sub> at 45 °C and stored at 5 °C. <sup>1</sup>H, <sup>13</sup>C, <sup>19</sup>F, <sup>11</sup>B, and <sup>31</sup>P NMR data for all previously uncharacterized compounds were obtained using Bruker Avance III 400 MHz and Bruker Avance III 500 MHz spectrometers and are referenced to TMS (0.00 ppm) or residual protio solvent signal. The NMR and mass spectroscopy facilities are supported by the NSF (CHE-1048642), the NIH (S10OD020022-1), the University of Wisconsin, and a generous gift from Paul J. and Margaret M. Bender.

## II. Synthesis of Polypyridyl Ru(II) Complexes

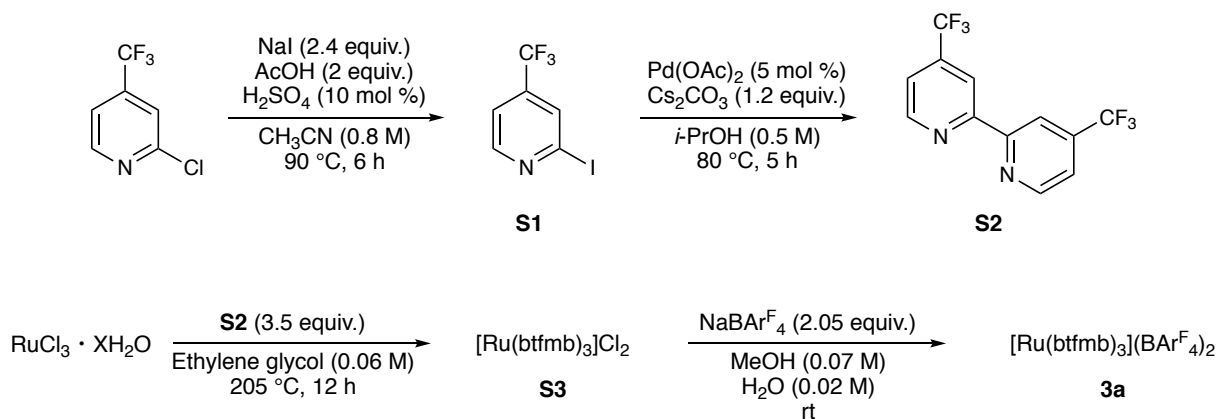

**2-Iodo-4-(trifluoromethyl)pyridine (S1).** A 250 mL round-bottom flask with a magnetic stirrer was charged with 2-chloro-4-(trifluoromethyl)pyridine (8.00 g, 44.1 mmol, 5.67 mL, 1 equiv.), NaI (15.8 g, 106 mmol, 2.4 equiv.), glacial AcOH (5.04 mL, 88.1 mmol, 2 equiv.), and CH<sub>3</sub>CN (55 mL, 0.8 M). To the resulting faint yellow solution was added conc. H<sub>2</sub>SO<sub>4</sub> (239 μL, 4.41 mmol, 0.1 equiv.) in a single portion, and the reaction turned bright red. The

reaction vessel was fitted with a water-cooled condenser before being placed in a 90 °C oil bath for 6 h. The resulting brown reaction was allowed to cool to rt, and the solvent was removed *in vacuo*. To the remaining residue was added H<sub>2</sub>O (75 mL) and, with rapid stirring, solid NaHCO<sub>3</sub> until the reaction mixture reached pH = 7. The aqueous mixture was transferred to a separatory funnel and extracted with CH<sub>2</sub>Cl<sub>2</sub> (3 x 100 mL). Residual iodine was removed by washing the combined organic phases with a saturated solution of sodium bisulfite (2 x 75 mL). The organic layer was washed with brine (1 x 50 mL), dried over Na<sub>2</sub>SO<sub>4</sub>, filtered, and concentrated *in vacuo* to afford a yellow oil that was purified via flash column chromatography on silica (hexanes:EtOAc = 20:1) to afford 8.25 g (30.2 mmol, 69% yield) of **S1** as a clear oil. <sup>1</sup>H NMR (500.0 MHz, CDCl<sub>3</sub>) δ 8.57 (d, *J* = 5.1 Hz, 1H), 7.96 (s, 1H), 7.49 (d, *J* = 5.1 Hz, 2H); <sup>13</sup>C NMR (125.7 MHz, CDCl<sub>3</sub>) δ 151.6, 139.5 (q, *J*<sub>C-F</sub> = 34.3 Hz), 130.7 (q, *J*<sub>C-F</sub> = 3.6 Hz), 121.6 (q, *J*<sub>C-F</sub> = 273.3 Hz), 118.5 (q, *J*<sub>C-F</sub> = 3.6 Hz), 118.0. These data are consistent with previously reported values.<sup>1</sup> Note: the iodopyridine is unstable towards long-term storage and should be used immediately or stored in a cool, dark place.

**4,4'-Bis(trifluoromethyl)-2,2'-bipyridine (S2).** A 250 mL round-bottom flask with a magnetic stirrer was charged with Pd(OAc)<sub>2</sub> (339 mg, 1.51 mmol, 0.05 equiv.) and Cs<sub>2</sub>CO<sub>3</sub> (11.8 g, 36.3 mmol, 1.2 equiv.). The flask was equipped with a water-cooled condenser and was purged with N<sub>2</sub>. Subsequently, a solution of **S1** (8.25 g, 30.2 mmol, 1 equiv.) in *i*-PrOH (60 mL, 0.5 M) was added. The reaction was heated to an oil bath temperature of 80 °C under N<sub>2</sub> for 5 h. The reaction was allowed to cool to room temperature and was filtered through a pad of Celite. The filter cake was washed with CH<sub>2</sub>Cl<sub>2</sub> (3 x 50 mL), and the volatiles were removed *in vacuo* to afford a brown solid. Insoluble impurities were removed by washing the brown solid with CH<sub>2</sub>Cl<sub>2</sub> and filtering. The solvent was removed *in vacuo*, and the crude product was purified via flash column chromatography on silica (hexanes:EtOAc = 10:1) to afford 2.46 g (8.41 mmol, 56% yield) of **S2** as a bright yellow solid. <sup>1</sup>H NMR (500.0 MHz, CDCl<sub>3</sub>) δ 8.89 (d, *J* = 5.0 Hz, 2H), 8.73 (s, 2H), 7.59 (d, *J* = 5.0 Hz, 2H); <sup>13</sup>C NMR (125.7 MHz, CDCl<sub>3</sub>) δ 156.1, 150.3, 139.6 (q, *J*<sub>C-F</sub> = 34.3 Hz), 122.8 (q, *J*<sub>C-F</sub> = 273.3 Hz), 119.9 (q, *J*<sub>C-F</sub> = 3.6 Hz), 117.2 (q, *J*<sub>C-F</sub> = 3.6 Hz). These data are consistent with previously reported values.<sup>2</sup>

**[Ru(btmb)<sub>3</sub>]Cl<sub>2</sub> (S3).** A 100 mL round-bottom flask with a magnetic stirrer was charged with RuCl<sub>3</sub>•XH<sub>2</sub>O (Strem Chemicals) (379 mg, 1.83 mmol, 1 equiv.) and **S2** (1.87 g, 6.40 mmol, 3.5 equiv.). The flask was equipped with a water-cooled condenser and was purged with N<sub>2</sub>. Subsequently, ethylene glycol (30 mL, 0.06 M) was added, and the reaction was heated to an oil bath temperature of 205 °C under N<sub>2</sub> for 12 h. The resulting dark red/black mixture was allowed to cool to rt. The crude reaction was added dropwise to a rapidly stirred mixture of Et<sub>2</sub>O/acetone (1:1, 250 mL) over 15 min. The resulting homogeneous mixture was transferred to a dropping funnel and added slowly to a rapidly stirred solution of Et<sub>2</sub>O (1.4 L) over 1 h. A red solid crashed out of solution during the addition and was isolated via slow filtration on a medium-porosity fritted funnel. The solid was washed with Et<sub>2</sub>O (2 x 30 mL), then passed through the fritted funnel with CH<sub>3</sub>CN. The volatiles were removed and the solid was dried under high vacuum. Thereafter, the dry solid was dissolved in CH<sub>3</sub>OH (100 mL) and added dropwise to a rapidly stirred solution of Et<sub>2</sub>O (350 mL) over 45 min. A red solid precipitated throughout the addition and was isolated on a fritted funnel and washed with Et<sub>2</sub>O (2 x 30 mL). The purified solid was dried under high vacuum at 70 °C for 2 h to afford 1.40 g (1.38 mmol, 76% yield) of **S3** as a red solid. <sup>1</sup>H NMR (500.0 MHz, CD<sub>3</sub>OD) δ 9.40 (s, 6H), 8.15 (d, *J* = 5.9 Hz, 6H), 7.87 (dd, *J* = 5.9, 1.6 Hz, 6H); <sup>13</sup>C NMR (125.7 MHz, CD<sub>3</sub>OD) δ 159.1, 155.0, 141.1 (q, *J*<sub>C-F</sub> = 35.8 Hz), 125.6 (q, *J*<sub>C-F</sub> = 3.3 Hz), 123.5 (q, *J*<sub>C-F</sub> = 274.6 Hz), 123.3 (q, *J*<sub>C-F</sub> = 3.3 Hz); <sup>19</sup>F NMR (376.5 MHz, CD<sub>3</sub>OD) δ -66.1. HRMS (+ p): calculated for C<sub>36</sub>H<sub>18</sub>ClF<sub>18</sub>N<sub>6</sub>Ru<sup>2+</sup> [*M*<sup>2+</sup> + A<sup>-</sup>]<sup>+</sup> = 1013.0032. Found = 1013.0039. Calculated for C<sub>36</sub>H<sub>18</sub>F<sub>18</sub>N<sub>6</sub>Ru<sup>2+</sup> [*M*]<sup>2+</sup> = 489.0169. Found = 489.0166.

**[Ru(btmb)<sub>3</sub>](BAR<sup>F</sup><sub>4</sub>)<sub>2</sub> (3a).** A 25 mL round-bottom flask with a magnetic stirrer was charged with **S3** (100 mg, 0.0987 mmol, 1 equiv.) and H<sub>2</sub>O (4.2 mL, 0.02 M). To this solution was added a solution of NaBAR<sup>F</sup><sub>4</sub> (Alfa Aesar) (179 mg, 0.202 mmol, 2.05 equiv.) in CH<sub>3</sub>OH (1.4 mL, 0.07 M). An orange precipitate immediately formed, and the solution became difficult to stir. Additional H<sub>2</sub>O (2 mL) was added, stirring was continued for 10 min, and the orange solid was isolated on a fritted funnel, washed with H<sub>2</sub>O (2 x 3 mL), and dried. The dried solid was dissolved in acetone/CH<sub>2</sub>Cl<sub>2</sub> (1:1, ~5 mL) and purified via gravity elution through a column of neutral Al<sub>2</sub>O<sub>3</sub> using CH<sub>2</sub>Cl<sub>2</sub> as the eluent. The first band that eluted was determined to be the desired product, so these fractions were combined, the

volatiles were removed *in vacuo*, and the resulting solid was dried under high vacuum. This residue was dissolved in a minimum volume of CH<sub>2</sub>Cl<sub>2</sub> (5 mL) and passed through a 0.2 μm Whatman PTFE filter to remove residual NaBAr<sup>F</sup><sub>4</sub>. To the filtrate was slowly added hexanes (30 mL) and an orange solid precipitated. The solid was isolated on a fritted funnel and dried under high vacuum to afford 220 mg (0.0819 mmol, 83% yield) of **3a** as a reddish/orange solid. <sup>1</sup>H NMR (500.0 MHz, CD<sub>3</sub>OD) δ 9.41 (s, 6H), 8.14 (d, *J* = 5.9 Hz, 6H), 7.86 (dd, *J* = 5.9, 1.6 Hz, 6H), 7.60 (m, 24H); <sup>13</sup>C NMR (125.7 MHz, CD<sub>3</sub>OD) δ 162.9 (q, *J*<sub>C-B</sub> = 49.7 Hz), 159.2, 154.8, 141.4 (q, *J*<sub>C-F</sub> = 35.9 Hz), 135.8, 130.4 (qq, *J*<sub>C-F</sub> = 31.6, 3.1 Hz), 125.7 (q, *J*<sub>C-F</sub> = 271.6 Hz), 125.5 (q, *J*<sub>C-F</sub> = 3.5 Hz), 124.1 (q, *J*<sub>C-F</sub> = 273.8 Hz), 123.3 (q, *J*<sub>C-F</sub> = 3.2 Hz), 118.5 (m); <sup>19</sup>F NMR (376.5 MHz, CD<sub>3</sub>OD) δ -64.3, -66.2; <sup>11</sup>B NMR (128.3 MHz, CD<sub>3</sub>OD) δ -6.77. HRMS (+ p): calculated for C<sub>36</sub>H<sub>18</sub>F<sub>18</sub>N<sub>6</sub>Ru<sup>2+</sup> [M]<sup>2+</sup> = 489.0169. Found = 489.0167. (- p): calculated C<sub>32</sub>H<sub>12</sub>BF<sub>24</sub> [A<sup>-</sup>] = 863.0654. Found = 863.0653.

**[Ru(btffmb)<sub>3</sub>](OTf)<sub>2</sub> (3b).** A 20 mL scintillation vial with a magnetic stirrer was charged with **S3** (250 mg, 0.25 mmol, 1 equiv.) and H<sub>2</sub>O (10 mL, 0.025 M). To this solution was added a solution of sodium triflate (NaOTf, 370 mg, 1.7 mmol, 6.9 equiv.) in H<sub>2</sub>O (3 mL, 0.57 M). An orange precipitate immediately formed, and the solution became difficult to stir. Additional H<sub>2</sub>O (4 mL) was added and stirring was continued for 10 min, and the orange solid was isolated on a fritted funnel, washed with H<sub>2</sub>O (2 x 5 mL), and dried. The dried product was sonicated in H<sub>2</sub>O (5 mL) for 2 min and isolated on a fritted funnel. The solid was collected and dried under high vacuum to afford 200 mg (0.157 mmol, 67% yield) of **3b** as a reddish/orange solid. <sup>1</sup>H NMR (500.0 MHz, CD<sub>3</sub>OD) δ 9.34 (s, 6H), 8.14 (d, *J* = 5.9 Hz, 6H), 7.84 (dd, *J* = 5.9, 1.2 Hz, 6H); <sup>13</sup>C NMR (125.7 MHz, CD<sub>3</sub>OD) δ 159.1, 154.9, 141.2 (q, *J*<sub>C-F</sub> = 35.7 Hz), 125.5 (q, *J*<sub>C-F</sub> = 3.4 Hz), 123.5 (q, *J*<sub>C-F</sub> = 273.4 Hz), 123.3 (m), 121.6 (q, *J*<sub>C-F</sub> = 318.4 Hz); <sup>19</sup>F NMR (376.5 MHz, CD<sub>3</sub>OD) δ -66.13, -80.11. HRMS (+ p): calculated for C<sub>37</sub>H<sub>18</sub>F<sub>21</sub>N<sub>6</sub>O<sub>3</sub>SRu<sup>+</sup> [M<sup>2+</sup> + A<sup>-</sup>]<sup>+</sup> = 11263.9864. Found = 1126.9866. Calculated for C<sub>36</sub>H<sub>18</sub>F<sub>18</sub>N<sub>6</sub>Ru<sup>2+</sup> [M]<sup>2+</sup> = 489.0169. Found = 489.0164. (- p): calculated CF<sub>3</sub>O<sub>3</sub>S<sup>-</sup> [A<sup>-</sup>] = 148.9526. Found = 148.9526.

Note: the mass spectrum of **3b** included a signal corresponding to the mass of the monoanionic ruthenium tris(trifluoromethanesulfonate), [[Ru(btffmb)<sub>3</sub>](OTf)<sub>3</sub>]<sup>-</sup> complex. This indicates a strong interaction between the ruthenium catalyst and triflate anions, consistent with the conclusions of this paper. Calculated for C<sub>39</sub>H<sub>18</sub>F<sub>27</sub>N<sub>6</sub>O<sub>9</sub>S<sub>3</sub>Ru<sup>-</sup> [M + 3A<sup>-</sup>]<sup>-</sup> = 1424.8915. Found = 1424.8924.

**Sodium 3,5-bis(trifluoromethyl)benzenesulfonate (Ar<sup>F</sup>SO<sub>3</sub>Na) (S4).** A 25 mL round-bottom flask with a magnetic stirrer was charged with 3,5-bis(trifluoromethyl)benzenesulfonyl chloride (3.35 g, 10.70 mmol) and millipore H<sub>2</sub>O (12 mL, 0.9 M). A reflux condenser was attached, and the heterogeneous reaction was heated to an oil bath temperature of 107 °C and stirred for 3 h. Thereafter, the reaction was briefly cooled, and a distillation head was attached. The residual H<sub>2</sub>O and dissolved HCl (g) were distilled away, and the resulting pale-yellow solid remaining in the distillation flask was dried *in vacuo*. This solid was dissolved in H<sub>2</sub>O (10 mL), and 4 M NaOH was added to the resulting homogeneous solution to achieve pH = 7. Throughout this process, a white solid precipitated from solution and was isolated. Two successive recrystallizations from boiling H<sub>2</sub>O (~10 mL) followed by drying under high vacuum in a desiccator over P<sub>2</sub>O<sub>5</sub> for 12 h provided 2.47 g (7.81 mmol, 73% yield) of **S4** as colorless needles. <sup>1</sup>H NMR (500.0 MHz, CD<sub>3</sub>OD) δ 8.34 (s, 2H), 8.06 (s, 1H), <sup>13</sup>C NMR (125.7 MHz, CD<sub>3</sub>OD) δ 149.6, 133.0 (q, *J*<sub>C-F</sub> = 33.8 Hz), 127.7 (q, *J*<sub>C-F</sub> = 3.5 Hz), 124.8 (septet, *J*<sub>C-F</sub> = 3.8 Hz), 124.6 (q, *J*<sub>C-F</sub> = 272.4 Hz); <sup>19</sup>F NMR (376.5 MHz, CD<sub>3</sub>OD) δ -64.5.

**[Ru(btffmb)<sub>3</sub>](Ar<sup>F</sup>SO<sub>3</sub>)<sub>2</sub> (3d).** A 50 mL round-bottom flask with a magnetic stirrer was charged with **S3** (450 mg, 0.444 mmol, 1 equiv.), **S4** (393 mg, 1.24 mmol, 2.8 equiv.) and MeOH (22 mL, 0.02 M). The flask was fitted with a reflux condenser, and the reaction was heated to an oil bath temperature of 75 °C for 90 min. After cooling to room temperature, MeOH was removed *in vacuo* to afford a red residue that was dissolved in acetone/CH<sub>2</sub>Cl<sub>2</sub> (1:1, ~8 mL) and subsequently purified via gravity elution through a column of neutral Al<sub>2</sub>O<sub>3</sub> using acetone/CH<sub>2</sub>Cl<sub>2</sub> (1:1) as the eluent. The first band that eluted was determined to be the desired product, so these fractions were combined, and the volatiles were removed *in vacuo*. The product was dissolved in a minimum volume

of EtOAc and passed through a 0.2  $\mu\text{m}$  Whatman PTFE filter to remove residual **S4**. The filtrate was layered hexanes and left to crystallize at 5  $^{\circ}\text{C}$ . The red needles that formed were isolated, washed with hexanes, and dried under high vacuum at 100  $^{\circ}\text{C}$  for 3 h to obtain 593 mg (0.379 mmol, 85% yield) of **3d** as a reddish/orange solid.  $^1\text{H}$  NMR (500.0 MHz,  $\text{CD}_3\text{OD}$ )  $\delta$  9.36 (s, 6H), 8.23 (s, 4H), 8.15 (d,  $J = 5.9$  Hz, 6H), 8.05 (s, 2H), 7.85 (d,  $J = 5.9$  Hz, 6H);  $^{13}\text{C}$  NMR (125.7 MHz,  $\text{CD}_3\text{OD}$ )  $\delta$  159.3, 155.1, 149.7, 141.5 (q,  $J_{\text{C-F}} = 35.5$  Hz), 133.0 (q,  $J_{\text{C-F}} = 33.6$  Hz), 127.6 (q,  $J_{\text{C-F}} = 3.6$  Hz), 125.7 (m), 124.8 (m), 124.7 (q,  $J = 277.7$  Hz), 123.9 (q,  $J_{\text{C-F}} = 273.2$  Hz), 123.4 (q,  $J = 3.6$  Hz);  $^{19}\text{F}$  NMR (376.5 MHz,  $\text{CD}_3\text{OD}$ )  $\delta$  -64.5, -66.1. HRMS (+ p): calculated for  $\text{C}_{44}\text{H}_{21}\text{F}_{18}\text{N}_6\text{O}_3\text{SRu}^+ [\text{M}^{2+} + \text{A}^-]^+$  = 1271.0051. Found = 1271.0053. Calculated for  $\text{C}_{36}\text{H}_{18}\text{F}_{18}\text{N}_6\text{Ru}^{2+} [\text{M}]^{2+}$  = 489.0169. Found = 489.0167. (- p): calculated  $\text{C}_8\text{H}_3\text{F}_6\text{O}_3\text{S}^- [\text{A}^-]$  = 292.9713. Found = 292.9714.

**[Ru(btmb)<sub>3</sub>](OTs)<sub>2</sub> (3e)**. Prepared according to the procedure outlined for **3d** using **S3** (80.5 mg, 0.0795 mmol, 1 equiv.), sodium *p*-toluenesulfonate (61.2 mg, 0.315 mmol, 2.2 equiv.) and MeOH (8.0 mL, 0.01 M). Obtained 90 mg (0.0729 mmol, 51% yield) of **3e** as a reddish/orange solid.  $^1\text{H}$  NMR (500.0 MHz,  $\text{CD}_3\text{OD}$ )  $\delta$  9.36 (s, 6H), 8.15 (d,  $J = 5.9$  Hz, 6H), 7.83 (d,  $J = 5.9$  Hz, 6H), 7.64 (d,  $J = 8.1$  Hz, 4H), 7.21 (d,  $J = 8.1$  Hz, 4H), 2.37 (s, 6H);  $^{13}\text{C}$  NMR (125.7 MHz,  $\text{CD}_3\text{OD}$ )  $\delta$  159.3, 155.1, 143.8, 141.8, 141.5 (q,  $J_{\text{C-F}} = 35.4$  Hz), 129.9, 127.0, 125.7 (q,  $J_{\text{C-F}} = 3.4$  Hz), 123.9 (q,  $J_{\text{C-F}} = 272.7$  Hz), 123.4 (q,  $J_{\text{C-F}} = 3.4$  Hz), 21.4;  $^{19}\text{F}$  NMR (376.5 MHz,  $\text{CD}_3\text{OD}$ )  $\delta$  -66.1. HRMS (+ p): calculated for  $\text{C}_{43}\text{H}_{23}\text{F}_{18}\text{N}_6\text{O}_3\text{SRu}^+ [\text{M}^{2+} + \text{A}^-]^+$  = 1149.0465. Found = 1149.0475. Calculated for  $\text{C}_{36}\text{H}_{18}\text{F}_{18}\text{N}_6\text{Ru}^{2+} [\text{M}]^{2+}$  = 489.0169. Found = 489.0169. (- p): calculated  $\text{C}_7\text{H}_7\text{O}_3\text{S}^- [\text{A}^-]$  = 171.0121. Found = 171.0122.

**Sodium 3,5-bis(trifluoromethyl)benzenecarboxylate (Ar<sup>F</sup>CO<sub>2</sub>Na) (S5)**. To a 250 mL round-bottom flask was added 3,5-bis(trifluoromethyl)benzenecarboxylic acid (1g, 3.90 mmol, 1 equiv.), NaOH (138 mg, 3.45 mmol, 0.95 equiv.), and  $\text{CH}_3\text{CN}$  (50 mL, 0.08 M). The reaction was stirred for 90 min and the solvent was removed under vacuum. To remove leftover carboxylic acid, the product was suspended in diethyl ether and filtered. The diethyl ether was removed, and 711 mg (2.54 mmol, 74%) of **S5** was isolated as a white power.  $^1\text{H}$  NMR (500.0 MHz,  $\text{CD}_3\text{OD}$ )  $\delta$  8.52 (s, 2H), 8.00 (s, 1H);  $^{13}\text{C}$  NMR (125.7 MHz,  $\text{CD}_3\text{OD}$ )  $\delta$  169.7, 140.68, 130.1 (q,  $J_{\text{C-F}} = 33.3$  Hz), 129.1 (q,  $J_{\text{C-F}} = 3.2$  Hz), 123.5 (q,  $J_{\text{C-F}} = 272.4$  Hz), 122.9 (sept,  $J_{\text{C-F}} = 3.9$  Hz);  $^{19}\text{F}$  NMR (376.5 MHz,  $\text{CD}_3\text{OD}$ )  $\delta$  -64.3.

**[Ru(btmb)<sub>3</sub>](Ar<sup>F</sup>CO<sub>2</sub>)<sub>2</sub> (3f)**. Prepared according to the procedure outlined for **3d** using **S3** (150 mg, 0.143 mmol, 1 equiv.), **S5** (43.2 mg, 0.222 mmol, 2.8 equiv.), and MeOH (4.0 mL, 0.02 M). Obtained 77.1 mg (0.0584 mmol, 73% yield) of **3f** as a reddish/orange solid.  $^1\text{H}$  NMR (500.0 MHz,  $\text{CD}_3\text{OD}$ )  $\delta$  9.31 (s, 6H), 8.36 (s, 4H), 8.07 (d,  $J = 5.9$  Hz, 6H), 7.89 (s, 2H), 7.76 (dd,  $J_{\text{C-F}} = 5.9, 1.6$  Hz, 6H);  $^{13}\text{C}$  NMR (125.7 MHz,  $\text{CD}_3\text{OD}$ )  $\delta$  169.3, 157.1, 153.4, 140.7, 139.9 (q,  $J_{\text{C-F}} = 35.8$  Hz), 130.8 (q,  $J_{\text{C-F}} = 33.1$  Hz), 129.1 (q,  $J_{\text{C-F}} = 3.6$  Hz), 124.1 (q,  $J_{\text{C-F}} = 3.5$  Hz), 123.5 (q,  $J_{\text{C-F}} = 271.9$  Hz), 122.9 (sept,  $J_{\text{C-F}} = 123.4$  Hz), 122.1 (q,  $J_{\text{C-F}} = 273.3$  Hz), 121.9 (q,  $J_{\text{C-F}} = 3.6$  Hz);  $^{19}\text{F}$  NMR (376.5 MHz,  $\text{CD}_3\text{OD}$ )  $\delta$  -64.3, -66.1. HRMS (+ p): calculated for  $\text{C}_{45}\text{H}_{21}\text{F}_{24}\text{N}_6\text{O}_2\text{Ru}^+ [\text{M}^{2+} + \text{A}^-]^+$  = 1271.0051. Found = 1271.0053. Calculated for  $\text{C}_{36}\text{H}_{18}\text{F}_{18}\text{N}_6\text{Ru}^{2+} [\text{M}]^{2+}$  = 489.0169. Found = 489.0167. (- p): calculated  $\text{C}_9\text{H}_3\text{F}_6\text{O}_2^- [\text{A}^-]$  = 257.0043. Found = 257.0044.

**[Ru(btmb)<sub>3</sub>](PF<sub>6</sub>)<sub>2</sub> (3c)**. To a 25 mL round-bottom flask with a magnetic stirrer was charged **S3** (261 mg, 0.258 mmol, 1 equiv.) and millipore  $\text{H}_2\text{O}$  (13 mL, 0.02 M). To the resulting dark red solution was added ammonium hexafluorophosphate (88.2 mg, 0.541 mmol, 2.1 equiv.). A reddish/orange solid immediately precipitated and stirring was continued for 10 min before the solid was isolated on a fritted funnel, washed with  $\text{H}_2\text{O}$  (2 x 3 mL), and dried. Recrystallization from an acetone/ $\text{Et}_2\text{O}$  bilayer provided 252 mg (0.199 mmol, 77% yield) of **3c** as a reddish/orange solid.  $^1\text{H}$  NMR (500.0 MHz,  $(\text{CD}_3)_2\text{SO}$ )  $\delta$  9.57 (s, 6H), 8.03 (d,  $J = 6.0$  Hz, 6H), 7.88 (dd,  $J = 6.0, 1.4$  Hz, 6H);  $^{13}\text{C}$  NMR (125.7 MHz,  $(\text{CD}_3)_2\text{SO}$ )  $\delta$  157.4, 153.8, 137.9 (q,  $J_{\text{C-F}} = 34.7$  Hz), 124.0 (q,  $J_{\text{C-F}} = 3.4$  Hz), 122.5 (q,  $J_{\text{C-F}} = 273.4$  Hz), 121.9 (q,  $J_{\text{C-F}} = 3.4$  Hz);  $^{19}\text{F}$  NMR (376.5 MHz,  $(\text{CD}_3)_2\text{SO}$ )  $\delta$  -63.0, -70.1 (d,  $J_{\text{F-P}} = 711.2$  Hz);  $^{31}\text{P}$  NMR (162.0 MHz,  $(\text{CD}_3)_2\text{SO}$ )  $\delta$  -144.2 (septet,  $J_{\text{P-F}} = 711.5$  Hz). These data are consistent with previously reported values.<sup>3</sup>  $\text{C}_{36}\text{H}_{18}\text{F}_{24}\text{N}_6\text{PRu}^+ [\text{M}^{2+} + \text{A}^-]^+$  = 1122.9990. Found = 1123.0004. Calculated for  $\text{C}_{36}\text{H}_{18}\text{F}_{18}\text{N}_6\text{Ru}^{2+} [\text{M}]^{2+}$  = 489.0169. Found = 489.0171. (- p): calculated  $\text{PF}_6^- [\text{A}^-]$  = 144.9647. Found = 144.9648.

### III. Visible Light Photocatalysis of Radical Cation [4+2] Diels–Alder Cycloadditions

**General procedure for experiments in Table 1:** A stock solution of anethole (54.6 mg, 55.3  $\mu\text{L}$ , 0.368 mmol), isoprene (75.3 mg, 111  $\mu\text{L}$ , 1.11 mmol), and trimethyl(phenyl)silane internal standard (55.4 mg, 63.4  $\mu\text{L}$ , 0.368 mmol) in dry  $\text{CH}_2\text{Cl}_2$  (4.38 mL) was prepared. 810  $\mu\text{L}$  aliquots of this stock solution were added to oven-dried 25 mL Schlenk tubes containing the appropriate ruthenium photocatalyst ( $6.14 \times 10^{-4}$  mmol, 1 mol%). This afforded reaction mixtures containing anethole (9.1 mg, 0.0614 mmol, 1 equiv.), isoprene (12.5 mg, 0.184 mmol, 3 equiv.), and trimethyl(phenyl)silane internal standard (9.2 mg, 0.0614 mmol, 1 equiv.) in  $\text{CH}_2\text{Cl}_2$  (0.77 mL, 0.08 M). A stir bar was added to each reaction. The solutions were submitted to three freeze-pump-thaw cycles, purged with  $\text{N}_2$ , and irradiated at room temperature using a 23 W compact fluorescent light (CFL) bulb. The yields and amount of remaining anethole in Table 1 were determined by  $^1\text{H}$  NMR analysis of the unpurified reaction mixtures.  $^1\text{H}$  NMR analysis of the cycloadduct was consistent with previously reported values.<sup>4</sup>

**General procedure for experiments with anion binder 7 in Table 4:** A stock solution of anethole, isoprene, and trimethyl(phenyl)silane internal standard in dry  $\text{CH}_2\text{Cl}_2$  was added to oven-dried 25 mL Schlenk tubes containing the appropriate ruthenium photocatalyst ( $6.14 \times 10^{-4}$  mmol, 1 mol%) and thiophosphotriamide **7** (9.2 mg, 0.0123 mmol, 20 mol%).<sup>5</sup> A stir bar was added to each reaction. The solutions were submitted to three freeze-pump-thaw cycles, purged with  $\text{N}_2$ , and irradiated at room temperature using a 23 W compact fluorescent light (CFL) bulb. The yields in Table 4 were determined by  $^1\text{H}$  NMR analysis of the unpurified reaction mixtures.

### IV. UV-Vis Spectra, Photoluminescence Spectra, and Chain Length Measurements

*UV-Vis spectroscopy:* Solution spectra were measured in  $\text{CH}_2\text{Cl}_2$  or acetonitrile at a ruthenium photocatalyst concentration of  $3.9 \times 10^{-5}$  M. UV-vis absorption spectra were recorded at room temperature using a Cary 50 spectrophotometer over a scan range of 600 nm $\rightarrow$ 200 nm at a scan rate of 300 nm/min and resolution of 0.5 nm.

*Steady-state photoluminescence spectroscopy:* Steady-state photoluminescence spectra were obtained at room temperature using a Hitachi F4500 fluorescence spectrophotometer with a scan range of 478 nm $\rightarrow$ 678 nm at a scan rate of 240 nm/min and resolution of 0.5 nm. The excitation wavelength was the peak of the MLCT absorbance spectra. Emission and excitation slit widths were maintained at 5 nm.

Solution spectra were measured in  $\text{CH}_2\text{Cl}_2$  or acetonitrile at a ruthenium photocatalyst [Ru] concentration of  $3.9 \times 10^{-5}$  M. The following sample preparation procedure was carried out in the dark. Samples were degassed by three freeze-pump-thaw cycles and subsequently transferred to fluorescence cuvettes that had been purged with  $\text{N}_2$  for 30 min. All photoluminescence spectra were acquired normal to the incident beam.

Excited-state photoluminescence quenching experiments were carried out as follows: the luminescence intensity of a  $3.9 \times 10^{-5}$  M solution of [Ru] in  $\text{CH}_2\text{Cl}_2$  was measured. Subsequently, aliquots of a  $1.6 \times 10^{-2}$  M stock solution of anethole quencher in  $\text{CH}_2\text{Cl}_2$  were added to 2.0 mL of  $7.8 \times 10^{-5}$  M solutions of [Ru] in  $\text{CH}_2\text{Cl}_2$ . The final solution volume was adjusted to 4.0 mL via dilution with  $\text{CH}_2\text{Cl}_2$ . Samples were degassed as described above, and the luminescence intensities were determined. The ratio of unquenched ( $F_0$ ) to quenched ( $F$ ) photoluminescence intensity was plotted against [anethole]. The data were linear and followed Stern–Volmer kinetics. A linear regression yielded the Stern–Volmer constants ( $K_{\text{SV}}$ ) and division by the unquenched excited-state lifetime provided the bimolecular quenching rate constants ( $k_q$ ).

The effect of thiophosphotriamide **7** on the photoluminescence of the  $[\text{Ru}(\text{btfmb})_3](\text{Ar}^{\text{F}}\text{SO}_3)_2$  photocatalyst was investigated as follows:  $[\text{Ru}(\text{btfmb})_3](\text{Ar}^{\text{F}}\text{SO}_3)_2$  (**3d**, 15.3 mg, 9.8  $\mu\text{mol}$ ) was dissolved in  $\text{CH}_2\text{Cl}_2$  (25 mL) to produce a  $3.9 \times 10^{-4}$  M stock solution. A 10 mL aliquot of the stock solution was diluted to 50 mL with  $\text{CH}_2\text{Cl}_2$  to produce a final concentration of  $7.8 \times 10^{-5}$  M. Thiophosphotriamide **7** (81.5 mg, 0.109 mmol) was dissolved in  $\text{CH}_2\text{Cl}_2$  to produce a 0.0109 M solution. Both solutions were transferred to a respective 25 mL Schlenk tubes (8 mL of solution **7**, 14 mL of solution **3d**). To another Schlenk tube was added 8 mL  $\text{CH}_2\text{Cl}_2$ . The three Schlenk tubes were then subjected to 3 freeze-pump-thaw cycles. Aliquots of each solution were transferred under  $\text{N}_2$  to a  $\text{N}_2$  sparged cuvette. The ruthenium concentration was maintained at  $4.0 \times 10^{-5}$  M, while the concentration of **7** was varied through different

addition volumes of the stock solution. The neat CH<sub>2</sub>Cl<sub>2</sub> was used to maintain an overall total volume of 3 mL in the cuvette.

Sample preparation for excited-state lifetime measurements was as follows: a  $3.9 \times 10^{-5}$  M solution of the respective ruthenium photosensitizer in CH<sub>2</sub>Cl<sub>2</sub> was degassed by 3 freeze-pump-thaw cycles and transferred to a N<sub>2</sub>-purged cuvette using standard Schlenk technique. Lifetime measurements were collected by the frequency-domain method with an ISS K2 multifrequency cross-correlation phase and modulation fluorometer. The excitation source was intensity modulated through varying MHz frequencies at the sample's absorption maximum, producing shifts in the intensity and phase of fluorescence emission. Comparison to a standard (in this case fluorescein and glycogen) allows lifetime determination. Data was analyzed in Vinci (ISS).

*Chain Length:* Chain lengths of radical cation Diels–Alder cycloadditions were determined as follows. The quantum yields ( $\Phi$ ) for the respective reactions were determined by the method outlined by Cismesia and Yoon.<sup>6</sup> To ascertain chain length, the following formula was employed:

$$\text{chain length} = \frac{\Phi(\tau^{-1} + k_{q,\text{anethole}}[\text{anethole}] + k_{q,\text{isoprene}}[\text{isoprene}] + k_{q,[2+2]}[2 + 2])}{k_{q,\text{anethole}}[\text{anethole}]}$$

where  $\tau$  is the excited-state lifetime of the respective photocatalyst ( $\tau^{-1} = k_r + k_{nr}$ ),  $k_{q,\text{anethole}}$ ,  $k_{q,\text{isoprene}}$ , and  $k_{q,[2+2]}$  are the rates of excited-state quenching by the designated species, and [anethole], [isoprene], and [2+2] are the concentrations of the designated species. The [2+2] product results from homodimerization of anethole and forms in very small amounts (~2%) at low conversions of anethole. Furthermore, the rate of excited-state quenching by isoprene was very small. Therefore, the final two terms in the numerator were determined to be negligible, and thus were ignored. Using this formula, chain lengths were determined for radical cation Diels–Alder cycloadditions catalyzed by [Ru(btfmtb)<sub>3</sub>](BAr<sup>F</sup><sub>4</sub>)<sub>2</sub> (quantum yield = 26, chain length = 26) and [Ru(btfmtb)<sub>3</sub>](Ar<sup>F</sup>SO<sub>3</sub>)<sub>2</sub> (quantum yield = 0.35, chain length = 0.40). Subsequently, a radical cation cycloaddition catalyzed by [Ru(btfmtb)<sub>3</sub>](Ar<sup>F</sup>SO<sub>3</sub>)<sub>2</sub> was performed in the presence of thiophosphotriamide **7** (20 mol%) (quantum yield = 7, chain length = 8). Therefore, thiophosphotriamide **7** exerts its greatest effect on chain length. See Table S11.

**Table S11. Quantum Yield and Chain Length of Diels–Alder Reaction**

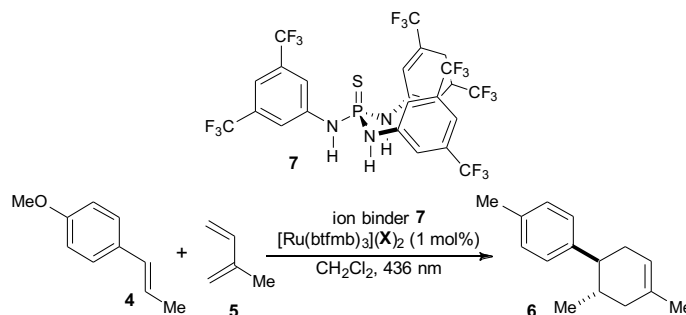

| entry | counteranion (X)                                           | H-bond cat 7 | quantum yield | chain length |
|-------|------------------------------------------------------------|--------------|---------------|--------------|
| 1     | BAr <sup>F</sup> <sub>4</sub> <sup>-</sup> ( <b>3a</b> )   | 0 mol%       | 26            | 26           |
| 2     | Ar <sup>F</sup> SO <sub>3</sub> <sup>-</sup> ( <b>3d</b> ) | 0 mol%       | 0.35          | 0.4          |
| 3     | Ar <sup>F</sup> SO <sub>3</sub> <sup>-</sup> ( <b>3d</b> ) | 20 mol%      | 7             | 8            |

## V. Cyclic Voltammetry Experiments

Cyclic voltammetry was performed on a BASi EC Epsilon potentiostat connected to a BASi C3 cell stand and analyzed on a PC using Epsilon software. A three-electrode setup was employed: Pt wire counter electrode, glassy carbon working electrode, and a Ag/AgNO<sub>3</sub> (0.01 M AgNO<sub>3</sub>, 0.1 M *n*-Bu<sub>4</sub>N<sup>+</sup> PF<sub>6</sub><sup>-</sup> in CH<sub>3</sub>CN) quasi-reference electrode containing a polished silver wire immersed in the electrolyte solution. The entire assembly of this electrode was contained in a glass body, the tip of which consisted of a Vycor plug. The electrolyte solution in the electrode was replaced daily to ensure the Vycor plug was free of contaminants. With this setup, Fc/Fc<sup>+</sup> (0.1 M *n*-Bu<sub>4</sub>N<sup>+</sup> PF<sub>6</sub><sup>-</sup> in CH<sub>3</sub>CN) was measured to be 0.093 V vs. Ag/AgNO<sub>3</sub>. A typical experiment was performed as follows: dry solvent and *n*-Bu<sub>4</sub>N<sup>+</sup> X<sup>-</sup> electrolyte (0.1 M) (for example, *n*-Bu<sub>4</sub>N<sup>+</sup> BAR<sup>F</sup><sub>4</sub><sup>-</sup> was used in the analysis of [Ru(btmb)<sub>3</sub>](BAR<sup>F</sup><sub>4</sub>)<sub>2</sub>) were introduced to the cell, the solution was sparged with dry N<sub>2</sub> with stirring for 5 min, and subsequently a voltammogram was recorded to establish background. Thereafter, the appropriate ruthenium catalyst complex (0.001 M) was introduced under N<sub>2</sub> and a second spectrum was collected. Finally, ferrocene internal standard (~0.001 M) was added, and a final voltammogram was collected. After referencing to ferrocene, voltammograms were referenced to SCE by adding 0.30 V to all potentials. Stirring was performed prior to each run to ensure exposure of electrodes to fresh analyte. The scan rate was typically 100 mV/s. Between each catalyst complex analyzed, the glassy carbon working electrode was polished on Al<sub>2</sub>O<sub>3</sub>, sonicated in ultrapure H<sub>2</sub>O, and washed in the organic solvent used for analysis.

For experiments performed in CH<sub>2</sub>Cl<sub>2</sub>, the working and reference electrodes were placed as close as possible without touching to minimize Ohmic drop in the poorly conductive, highly resistive CH<sub>2</sub>Cl<sub>2</sub> solvent. IR compensation experiments were performed in CH<sub>2</sub>Cl<sub>2</sub> in the presence of an appropriate *n*-Bu<sub>4</sub>N<sup>+</sup> X<sup>-</sup> electrolyte.<sup>7</sup> The uncompensated resistance was found to vary slightly with *n*-Bu<sub>4</sub>N<sup>+</sup> X<sup>-</sup> electrolyte and was typically between 550–850 Ohm. However, when IR compensation was applied, the half-wave potentials of both ferrocene and the catalyst redox couple of interest showed minimal (< 30 mV) shifts, and due to distortions sometimes introduced into the data by using IR compensation, compensation was not employed. It should be noted that all redox couples in CH<sub>2</sub>Cl<sub>2</sub> exhibited quasi-reversible behavior, with 90 mV < ΔE<sub>p</sub> < 180 mV (peak separation increased with increasing Lewis basicity of X<sup>-</sup> in supporting electrolyte and catalyst complex) and 1.1 < i<sub>p</sub>/i<sub>pa</sub> < 1.4. Redox couples in CH<sub>3</sub>CN exhibited reversible, Nernstian behavior.

### Preparation of supporting electrolytes

**Tetrabutylammonium tetrakis-(3,5-bis(trifluoromethyl)phenyl)borate (*n*-Bu<sub>4</sub>N<sup>+</sup> BAR<sup>F</sup><sub>4</sub><sup>-</sup>) (S6).** To a 25 mL round-bottom flask with a stir bar was added NaBAR<sup>F</sup><sub>4</sub> (1.33 g, 1.53 mmol, 1 equiv.) and distilled acetone (5.0 mL, 0.3 M). The solution was stirred until homogeneous, and subsequently, a solution of tetrabutylammonium chloride (426 mg, 1.53 mmol, 1 equiv.) in acetone (1.2 mL) was added. NaCl immediately precipitated from solution. The reaction was stirred for an additional 15 min before being filtered through a 0.2 μM Whatman filter. Acetone was removed *in vacuo*, and the resulting viscous oil was dried under high vacuum for 1 h. Thereafter, the oil was dissolved in CH<sub>2</sub>Cl<sub>2</sub> (10 mL), filtered, and CH<sub>2</sub>Cl<sub>2</sub> was removed *in vacuo*. The oil was again dried on high vacuum and crystallization was induced by cooling to -78 °C and allowing slow warming to room temperature under high vacuum. The resulting white solid was dried to constant mass to obtain 1.68 g (1.52 mmol, 99% yield) of S6 as a white, hygroscopic solid. <sup>1</sup>H NMR (500.0 MHz, CDCl<sub>3</sub>) δ 7.69 (s, 8H), 7.53 (s, 4H), 2.99 (m, 8H), 1.53 (m, 8H), 1.33 (dq, *J* = 14.8, 7.2 Hz, 8H), 0.93 (t, *J* = 7.2 Hz, 12H); <sup>13</sup>C NMR (125.7 MHz, CDCl<sub>3</sub>) δ 161.7 (q, *J*<sub>C-B</sub> = 49.6 Hz), 134.8, 128.8 (qq, *J*<sub>C-F</sub> = 31.6, 3.1 Hz), 124.5 (q, *J*<sub>C-F</sub> = 271.6 Hz), 117.4 (m), 58.9, 23.6, 19.5, 13.1; <sup>19</sup>F NMR (376.5 MHz, CDCl<sub>3</sub>) δ -62.4; <sup>11</sup>B NMR (128.3 MHz, CDCl<sub>3</sub>) δ -6.63.

**Tetrabutylammonium 3,5-bis(trifluoromethyl)benzenesulfonate (*n*-Bu<sub>4</sub>N<sup>+</sup> Ar<sup>F</sup>SO<sub>3</sub><sup>-</sup>) (S7).** A 100 mL round-bottom flask with a magnetic stirrer was charged with 3,5-bis(trifluoromethyl)benzenesulfonyl chloride (Matrix Scientific) (1.99 g, 6.35 mmol) and H<sub>2</sub>O (15 mL, 0.4 M). A reflux condenser was attached, and the heterogeneous reaction was heated to an oil bath temperature of 107 °C and stirred for 3 h. Thereafter, the reaction was briefly

cooled, and a distillation head was attached. The residual H<sub>2</sub>O and dissolved HCl (g) were distilled off and the resulting pale-yellow solid remaining in the distillation flask was dried *in vacuo*. This solid was dissolved in H<sub>2</sub>O (4 mL, 1.6 M) and a 1.0 M solution of tetrabutylammonium hydroxide in MeOH was added to achieve pH = 7. Subsequently, H<sub>2</sub>O and MeOH were removed *in vacuo*, the residue obtained was dried on high vacuum and thereafter was dissolved in CH<sub>2</sub>Cl<sub>2</sub> and filtered to remove insoluble solids. Recrystallization from H<sub>2</sub>O followed by drying under high vacuum provided 2.06 g (3.85 mmol, 61% yield) of **S7** as colorless needles. <sup>1</sup>H NMR (500.0 MHz, CDCl<sub>3</sub>) δ 8.40 (s, 2H), 7.81 (s, 1H), 3.30 (m, 8H), 1.65 (m, 8H), 1.42 (dq, *J* = 14.8, 7.2 Hz, 8H), 0.99 (t, *J* = 7.2 Hz, 12H); <sup>13</sup>C NMR (125.7 MHz, CDCl<sub>3</sub>) δ 149.4, 131.2 (q, *J*<sub>C-F</sub> = 33.4 Hz), 126.8 (q, *J*<sub>C-F</sub> = 3.5 Hz), 123.0 (q, *J*<sub>C-F</sub> = 272.4 Hz), 122.5 (septet, *J*<sub>C-F</sub> = 3.8 Hz), 58.8, 23.9, 19.7, 13.5; <sup>19</sup>F NMR (376.5 MHz, CDCl<sub>3</sub>) δ -62.8.

**Tetrabutylammonium *p*-toluenesulfonate (*n*-Bu<sub>4</sub>N<sup>+</sup> OTs<sup>-</sup>) (**S8**).** A 25 mL round-bottom flask with a magnetic stirrer was charged with *p*-toluenesulfonic acid monohydrate (1.00 g, 5.26 mmol) and H<sub>2</sub>O (3 mL, 1.8 M). A 1.0 M solution of tetrabutylammonium hydroxide in MeOH was added over 5 min to achieve pH = 7 (5.2 mL added). The exothermic reaction was allowed to stir for 15 min, and subsequently, H<sub>2</sub>O and MeOH were removed *in vacuo*. The residue obtained was dissolved in CH<sub>2</sub>Cl<sub>2</sub>, transferred to a separatory funnel, separated from residual H<sub>2</sub>O, and filtered to remove insoluble solids. Removal of CH<sub>2</sub>Cl<sub>2</sub> *in vacuo* followed by recrystallization from H<sub>2</sub>O and drying under high vacuum provided 1.38 g (3.85 mmol, 63% yield) of **S8** as colorless needles. Spectral data were consistent with previously reported values.<sup>8</sup>

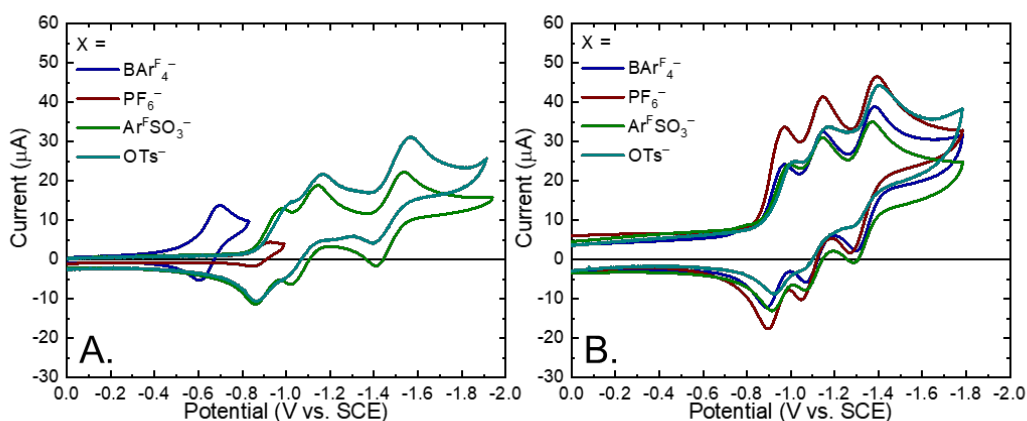

**Figure S11.** Cyclic voltammograms of the [Ru(btmb)<sub>3</sub>](X)<sub>2</sub> catalysts in A. CH<sub>2</sub>Cl<sub>2</sub> and B. CH<sub>3</sub>CN at a scan rate of 100 mV/sec and 0.1 M electrolyte solution composed of the *n*-Bu<sub>4</sub>N<sup>+</sup> salt of the indicated counterion.

**Table S12. Electrochemical potentials of [Ru(btmb)<sub>3</sub>](X)<sub>2</sub> in CH<sub>3</sub>CN.**

| entry | catalyst  | ΔG <sub>ES</sub><br>(eV) | Ru <sup>2+/+</sup><br>(V) | Ru <sup>2+*/+</sup><br>(V) | Ru <sup>+/0</sup><br>(V) | Ru <sup>0/-</sup><br>(V) |
|-------|-----------|--------------------------|---------------------------|----------------------------|--------------------------|--------------------------|
| 1     | <b>3a</b> | 2.04                     | -0.93                     | +1.11                      | -1.11                    | -1.35                    |
| 2     | <b>3c</b> | 2.04                     | -0.93                     | +1.11                      | -1.10                    | -1.33                    |
| 3     | <b>3d</b> | 2.04                     | -0.95                     | +1.09                      | -1.11                    | -1.34                    |
| 4     | <b>3e</b> | 2.04                     | -0.98                     | +1.06                      | -1.11                    | -1.35                    |



## VI. $^1\text{H}$ NMR Experiments

### Hydrogen-Bond Donor Co-Catalyst Titration:

The equilibrium constant for the binding of  $\text{Ar}^{\text{F}}\text{SO}_3^-$  to thiophosphotriamide **7** was determined through NMR titration studies. A solution of thiophosphotriamide **7** (0.16 mg, 0.21  $\mu\text{mol}$ , 1.0 equiv.) in  $\text{CD}_2\text{Cl}_2$  (500  $\mu\text{L}$ ) was transferred to an NMR tube. Separately, a stock solution containing both  $n\text{-Bu}_4\text{N}^+ \text{Ar}^{\text{F}}\text{SO}_3^-$  (5.6 mg, 10.5  $\mu\text{mol}$ ) and thiophosphotriamide **7** (1.3 mg, 1.74  $\mu\text{mol}$ ) in  $\text{CD}_2\text{Cl}_2$  (4.0 mL) was prepared. Increasing amounts of this solution were titrated into the NMR tube in 10  $\mu\text{L}$  aliquots. The titration was quantified by monitoring the chemical shift of the aromatic C–H resonances of **7**, which moved downfield with increasing concentration of  $n\text{-Bu}_4\text{N}^+ \text{Ar}^{\text{F}}\text{SO}_3^-$ .

The changes in chemical shift ( $\Delta\text{ppm}$ ) were fit to a 1:1 binding model. Microsoft Excel was used to alter  $K_a$  to minimize the error between the calculated and experimental chemical shifts. The resulting binding isotherm is shown below.  $K_a = 1.3 \times 10^6$ .

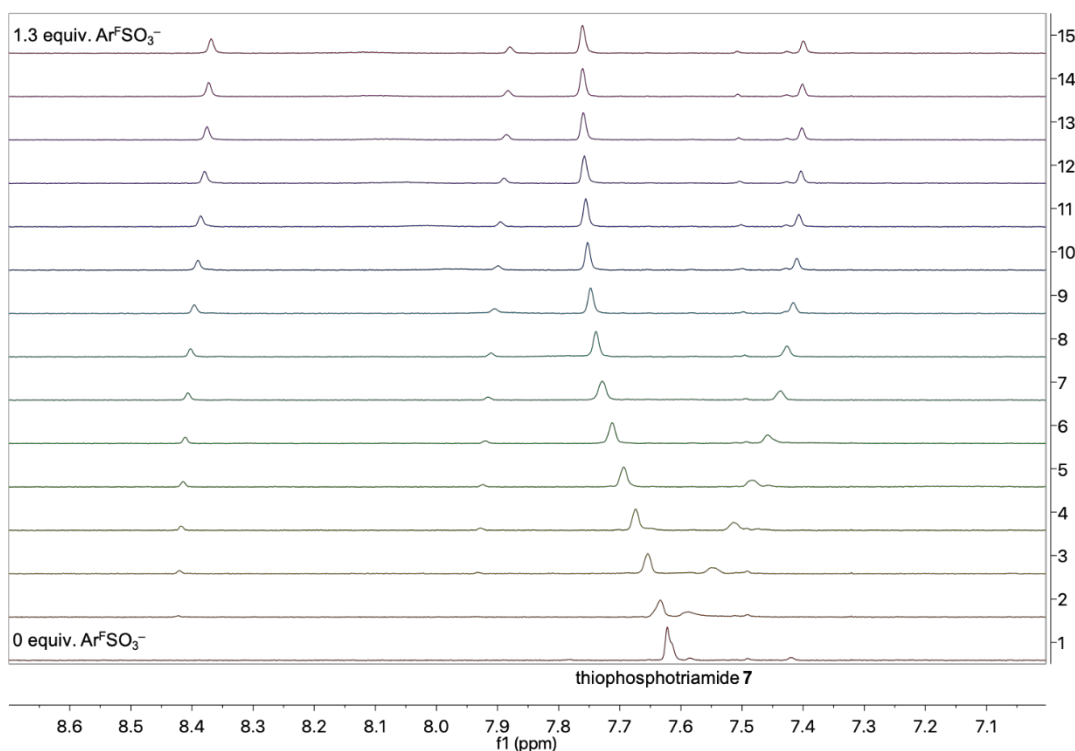

**Figure S12.** Aromatic region of the  $^1\text{H}$  NMR titration of thiophosphotriamide **7** with  $n\text{-Bu}_4\text{N}^+ \text{Ar}^{\text{F}}\text{SO}_3^-$  in  $\text{CD}_2\text{Cl}_2$ . The C–H chemical shift of **7** is noted in the figure.

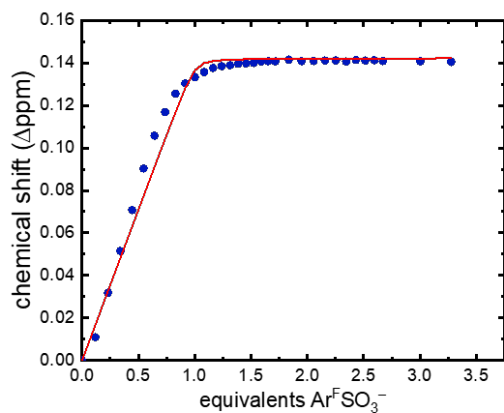

**Figure S13.** Change in chemical shift of the thiophosphotriamide **7** C–H resonance, blue circles. Overlaid is the best fit to a 1:1 binding model, solid line.

Chemical Shift Dependence on Counteranion Identity:

$^1\text{H}$  NMR Spectra of  $[\text{Ru}(\text{btfmb})_3](\text{X})_2$  (expansions of aromatic regions shown)

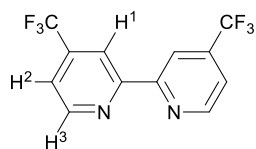

$^1\text{H}$  NMR Spectra in  $\text{CD}_3\text{OD}$

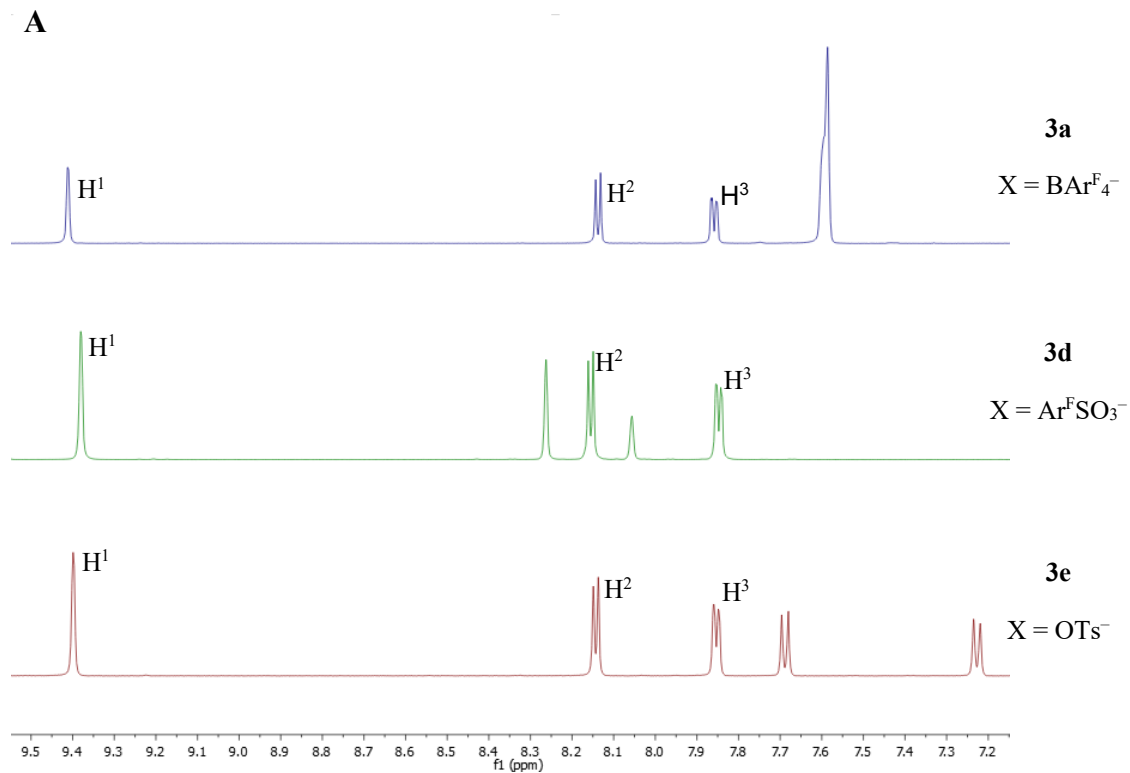

$^1\text{H}$  NMR Spectra in  $\text{CD}_2\text{Cl}_2$

**B**

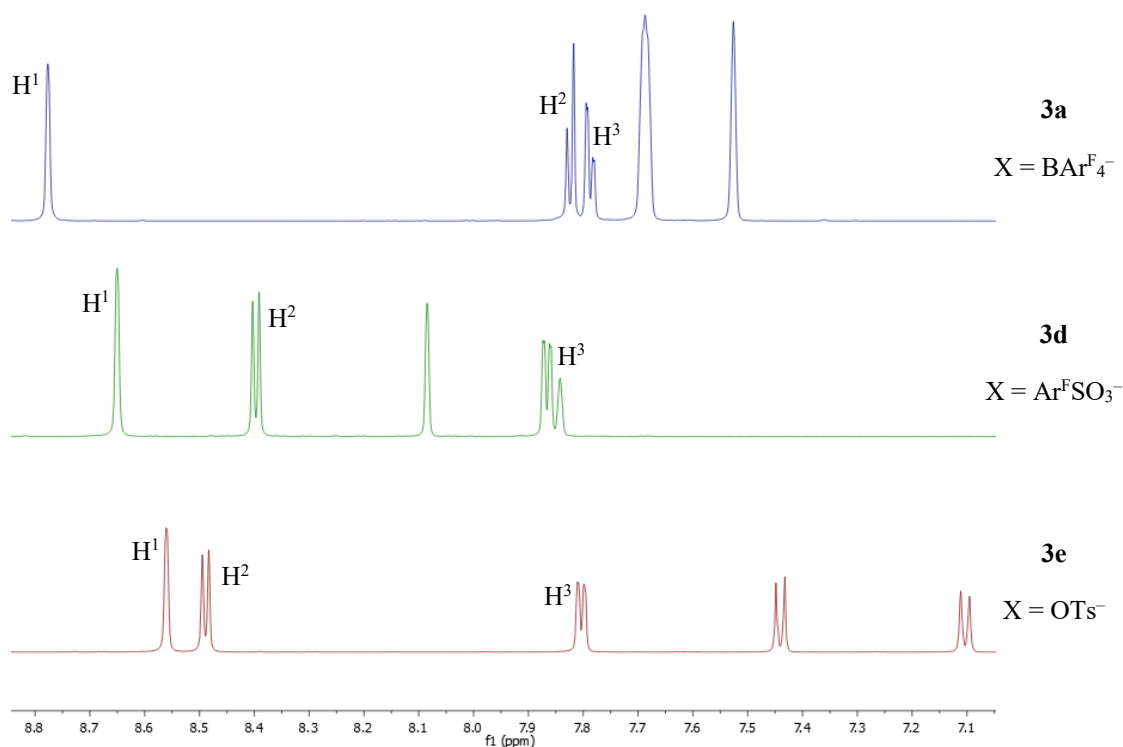

**Figure SI4.** The  $^1\text{H}$  NMR chemical shifts for catalysts **3a**, **3d**, and **3e** in  $\text{CD}_3\text{OD}$  (A) and  $\text{CD}_2\text{Cl}_2$  (B). In  $\text{CD}_2\text{Cl}_2$  significant changes in the proton spectra of the btmb ligands were measured between the photocatalysts. These changes tracked the coordinating ability of the counteranion in good agreement with the hypothesis of Meyer and coworkers of specific interactions between the counteranion and specific positions on the ligands.<sup>9</sup>

## VII. References

- <sup>1</sup> Schlosser, M.; Marull, M. "The Direct Metalation and Subsequent Functionalization of Trifluoromethyl-Substituted Pyridines and Quinolones," *Eur. J. Org. Chem.* **2003**, 1569–1575.
- <sup>2</sup> Schultz, D.M.; Sawicki, J.W.; Yoon, T.P. "An Improved Procedure for the Preparation of Ru(bpz)<sub>3</sub>(PF<sub>6</sub>)<sub>2</sub> Via a High-Yielding Synthesis of 2,2'-Bipyrazine," *Beilstein J. Org. Chem.* **2015**, *11*, 61–65.
- <sup>3</sup> Furue, M.; Maruyama, K.; Oguni, T.; Naiki, M.; Kamachi, M. "Trifluoromethyl-Substituted 2,2'-Bipyridine ligands. Synthetic Control of Excited-State Properties of Ruthenium(II) Tris-Chelate Complexes," *Inorg. Chem.* **1992**, *31*, 3792–3795.
- <sup>4</sup> Lin, S.; Ischay, M.A.; Fry, C.F.; Yoon, T.P. "Radical Cation Diels-Alder Cycloadditions by Visible Light Photocatalysis," *J. Am. Chem. Soc.* **2011**, *133*, 19350–19353.
- <sup>5</sup> Cranwell, P.B.; Hiscock, J.R.; Haynes, C.J.E.; Light, M.E.; Wells, N.J.; Gale, P.A. "Anion Recognition and Transport Properties of Sulfamide-, Phosphoric Triamide- and Thiophosphoric Triamide-Based Receptors," *Chem. Commun.* **2013**, *49*, 874–876.
- <sup>6</sup> Cismesia, M. A.; Yoon, T. P. "Characterizing Chain Processes in Visible Light Photoredox Catalysis," *Chem. Sci.* **2015**, *6*, 5426–5434.
- <sup>7</sup> Bond, A.M.; Oldham, K.B.; Snook, G.A. "Use of the Ferrocene Oxidation Process to Provide Both Reference Electrode Potential Calibration and a Simple Measurement (Via Semiintegration) of the Uncompensated Resistance in Cyclic Voltammetric Studies in High-Resistance Organic Solvents," *Anal. Chem.* **2000**, *72*, 3492–3496.
- <sup>8</sup> Kohno, Y.; Arai, H.; Saita, S.; Ohno, H. "Material Design of Ionic Liquids to Show Temperature-Sensitive LCST-Type Phase Transition After Mixing with Water," *Aust. J. Chem.* **2011**, *64*, 1560–1567.
- <sup>9</sup> Li, G.; Swords, W. B.; Meyer, G. J. "Bromide Photo-oxidation Sensitized to Visible light in Consecutive Ion Pairs," *J. Am. Chem. Soc.* **2017**, *139*, 14983–14991.

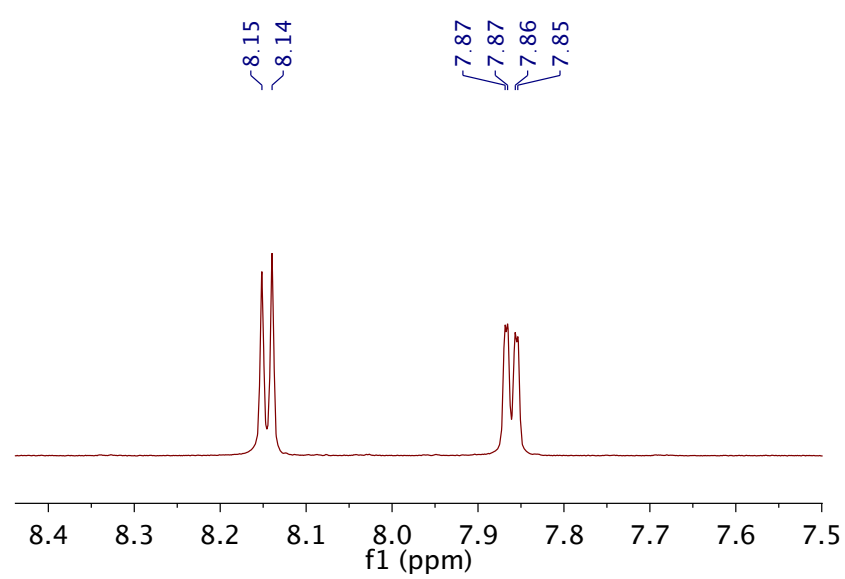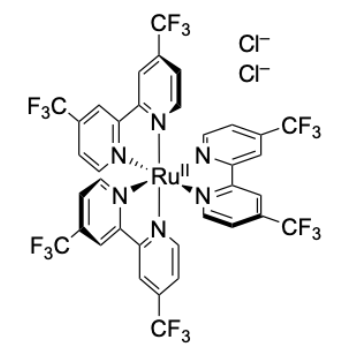

[Ru(btmb)<sub>3</sub>](Cl)<sub>2</sub> (S3)  
<sup>1</sup>H NMR (500.0 MHz, CD<sub>3</sub>OD)

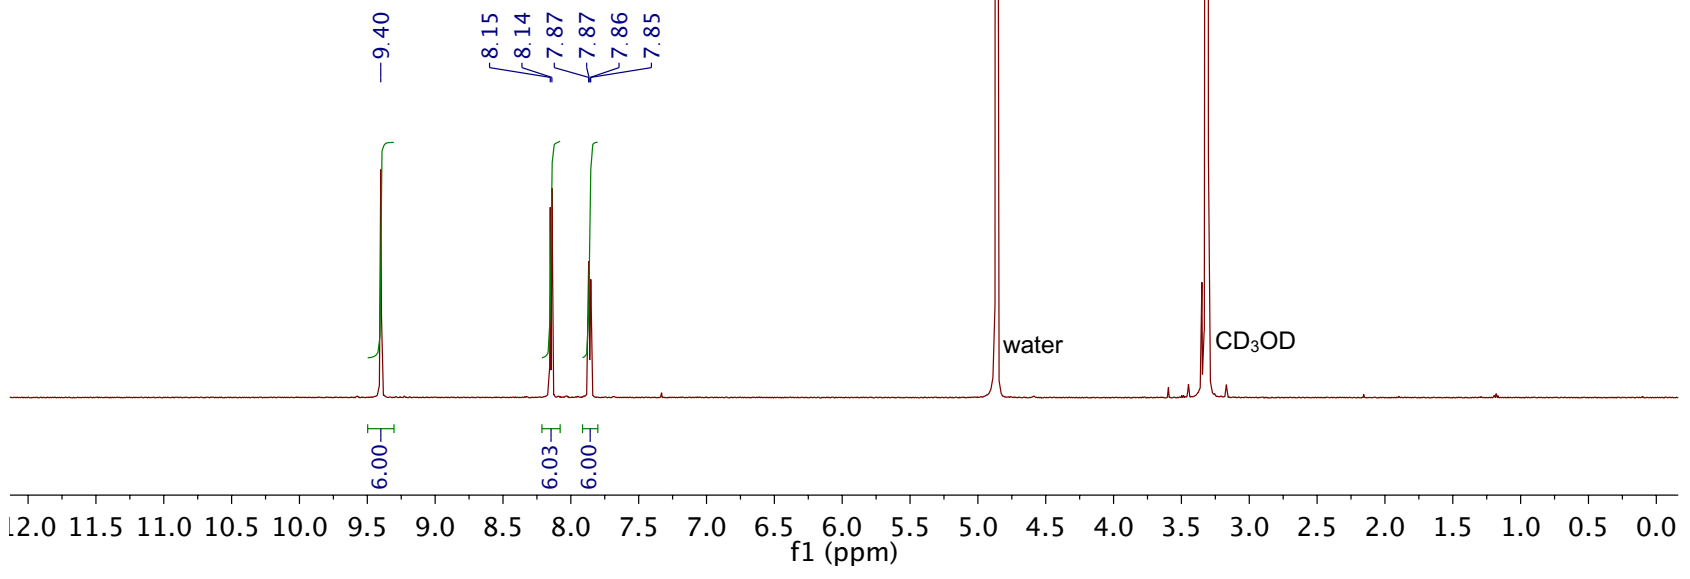

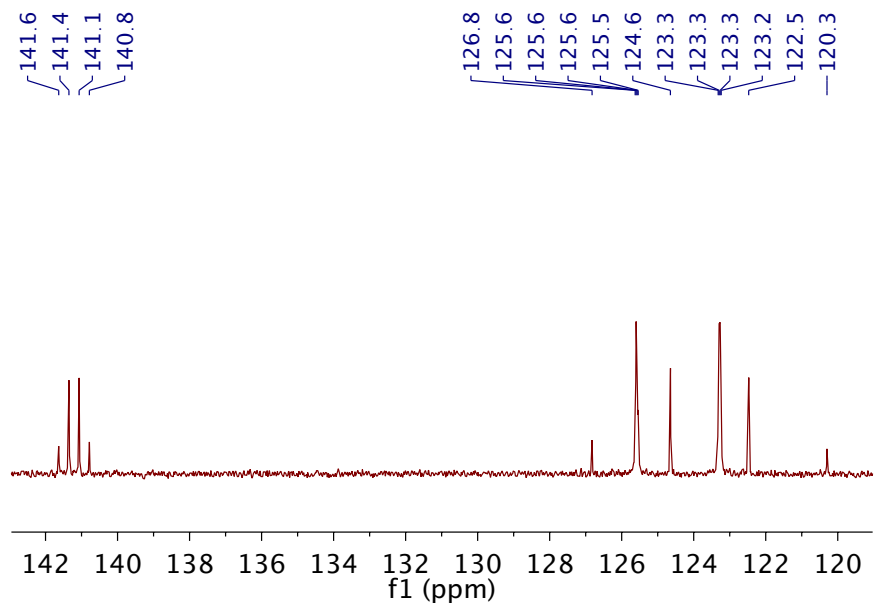

[Ru(btmb)<sub>3</sub>](Cl)<sub>2</sub> (S3)  
<sup>13</sup>C NMR (125.7 MHz, CD<sub>3</sub>OD)

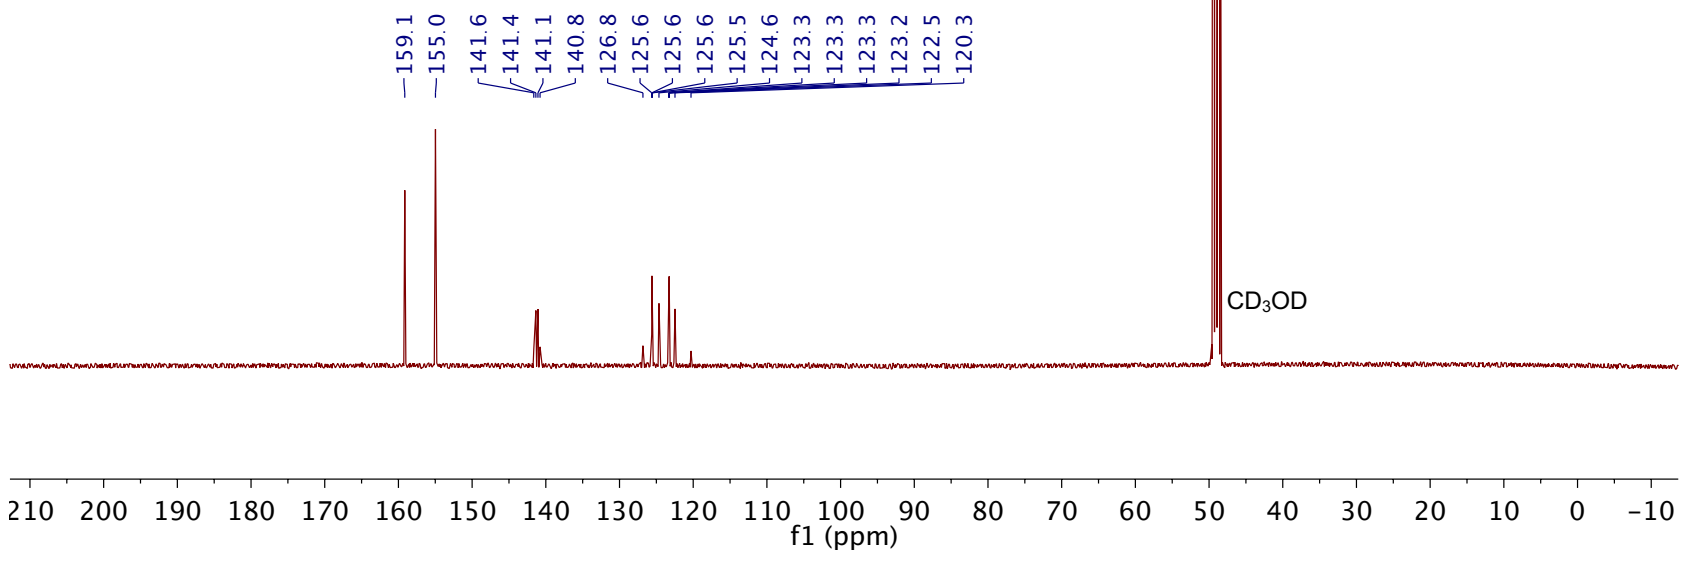

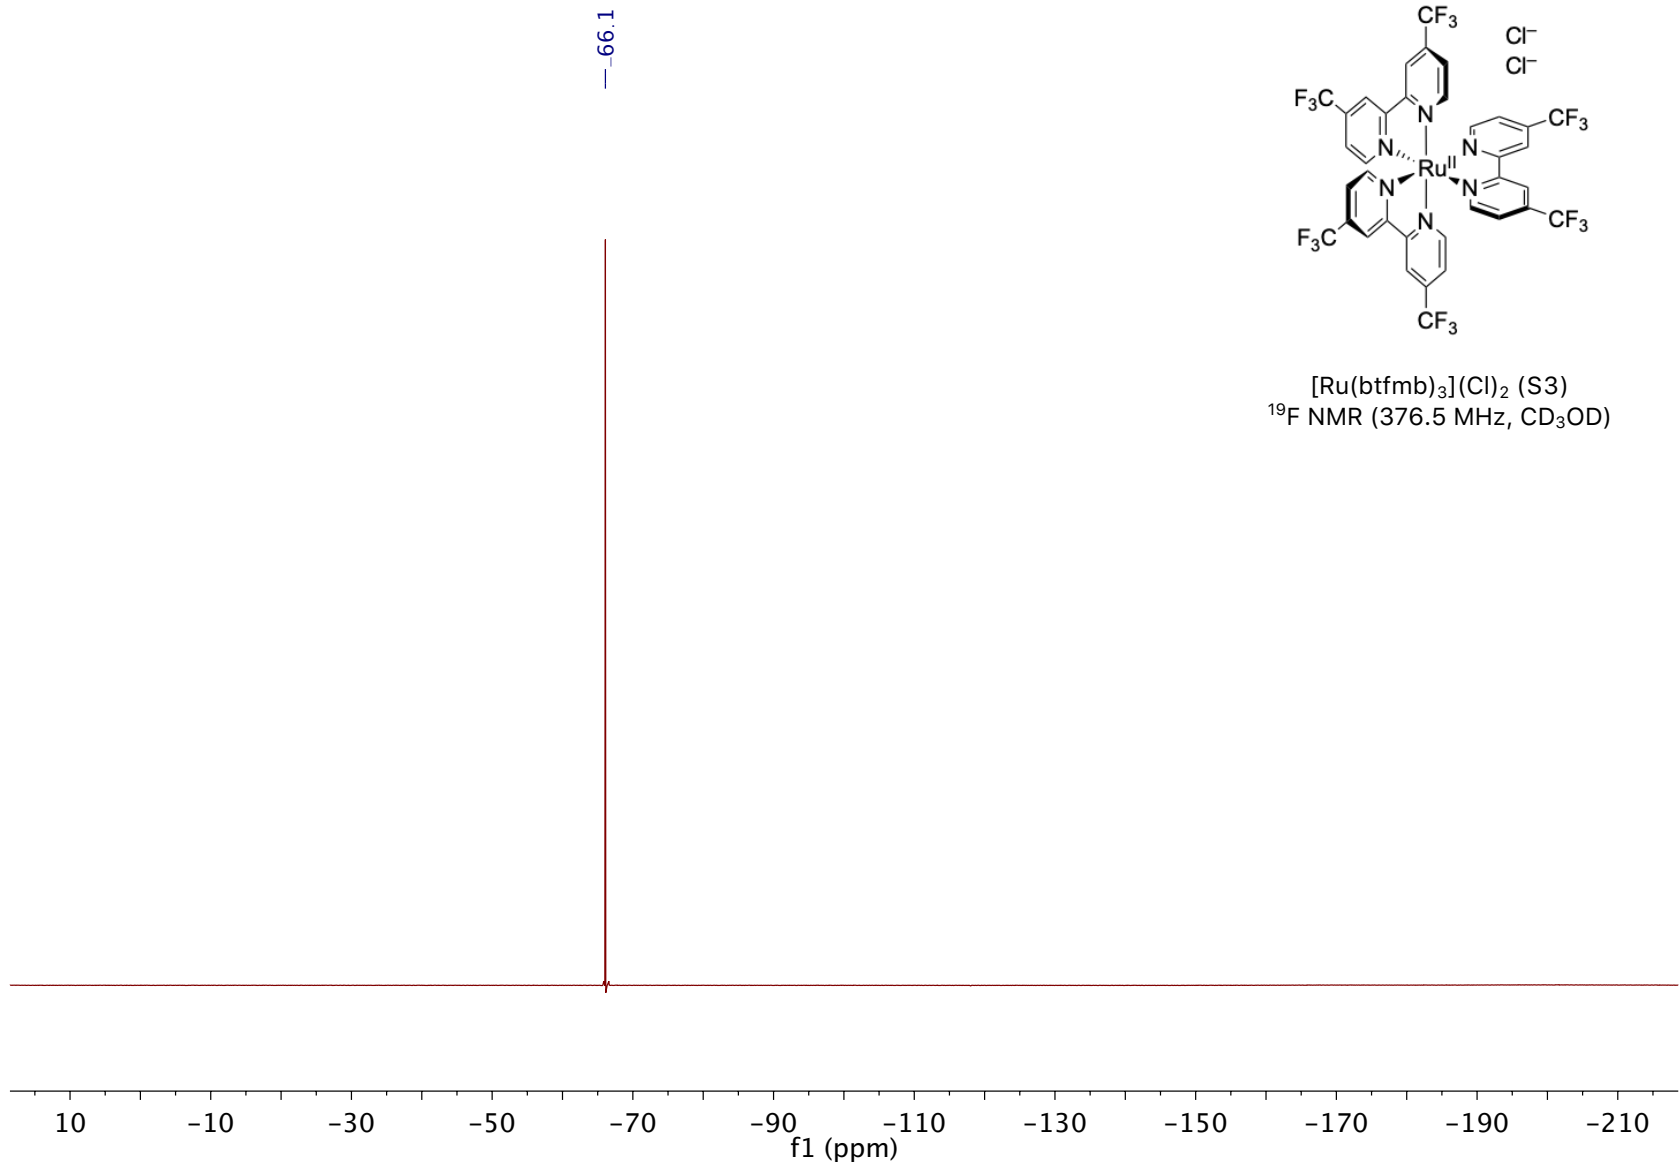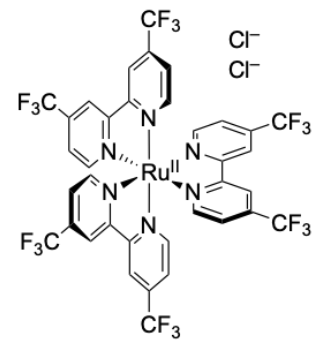

[Ru(btmb)<sub>3</sub>](Cl)<sub>2</sub> (S3)  
<sup>19</sup>F NMR (376.5 MHz, CD<sub>3</sub>OD)

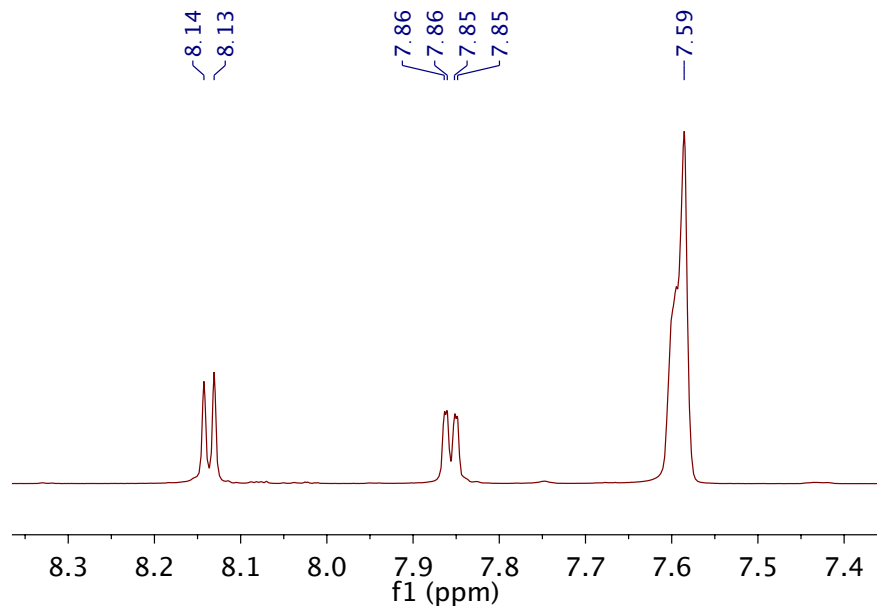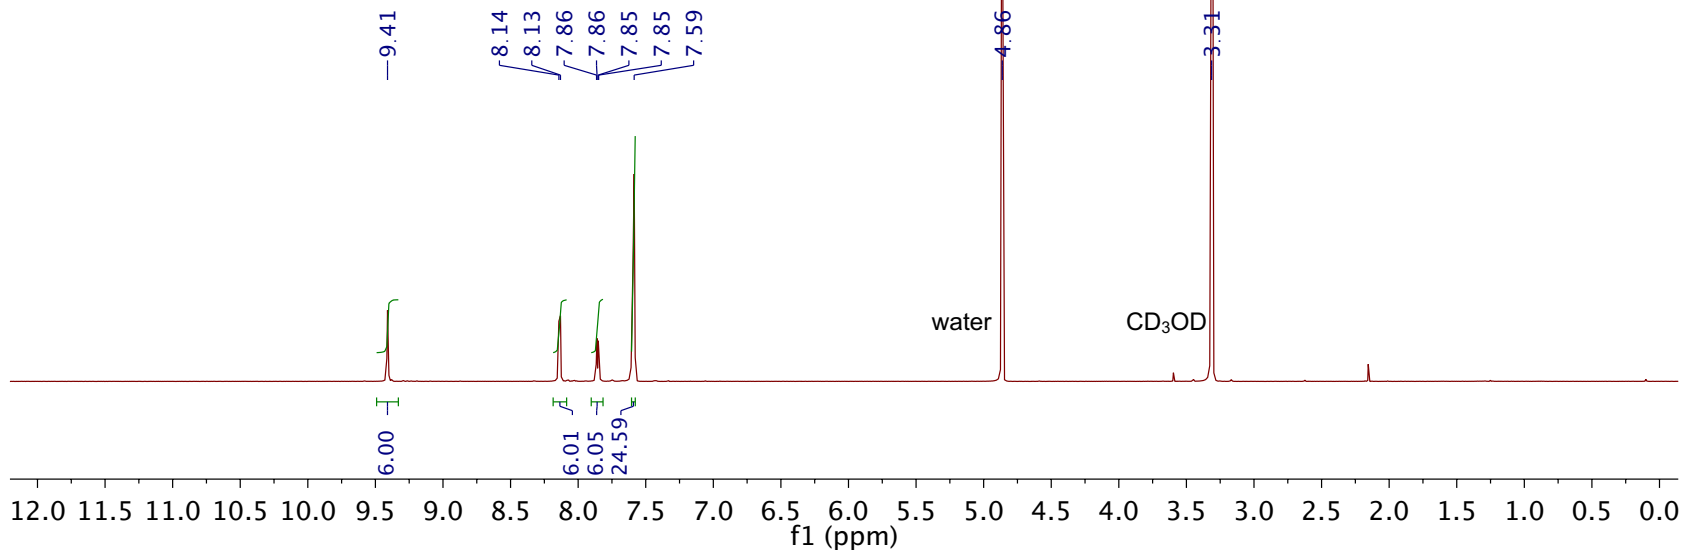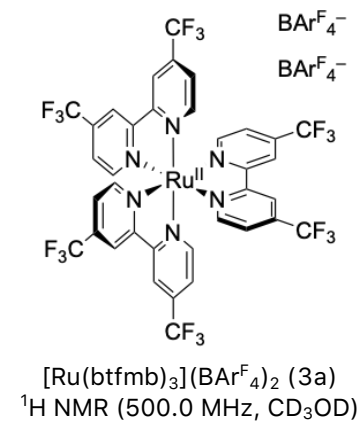



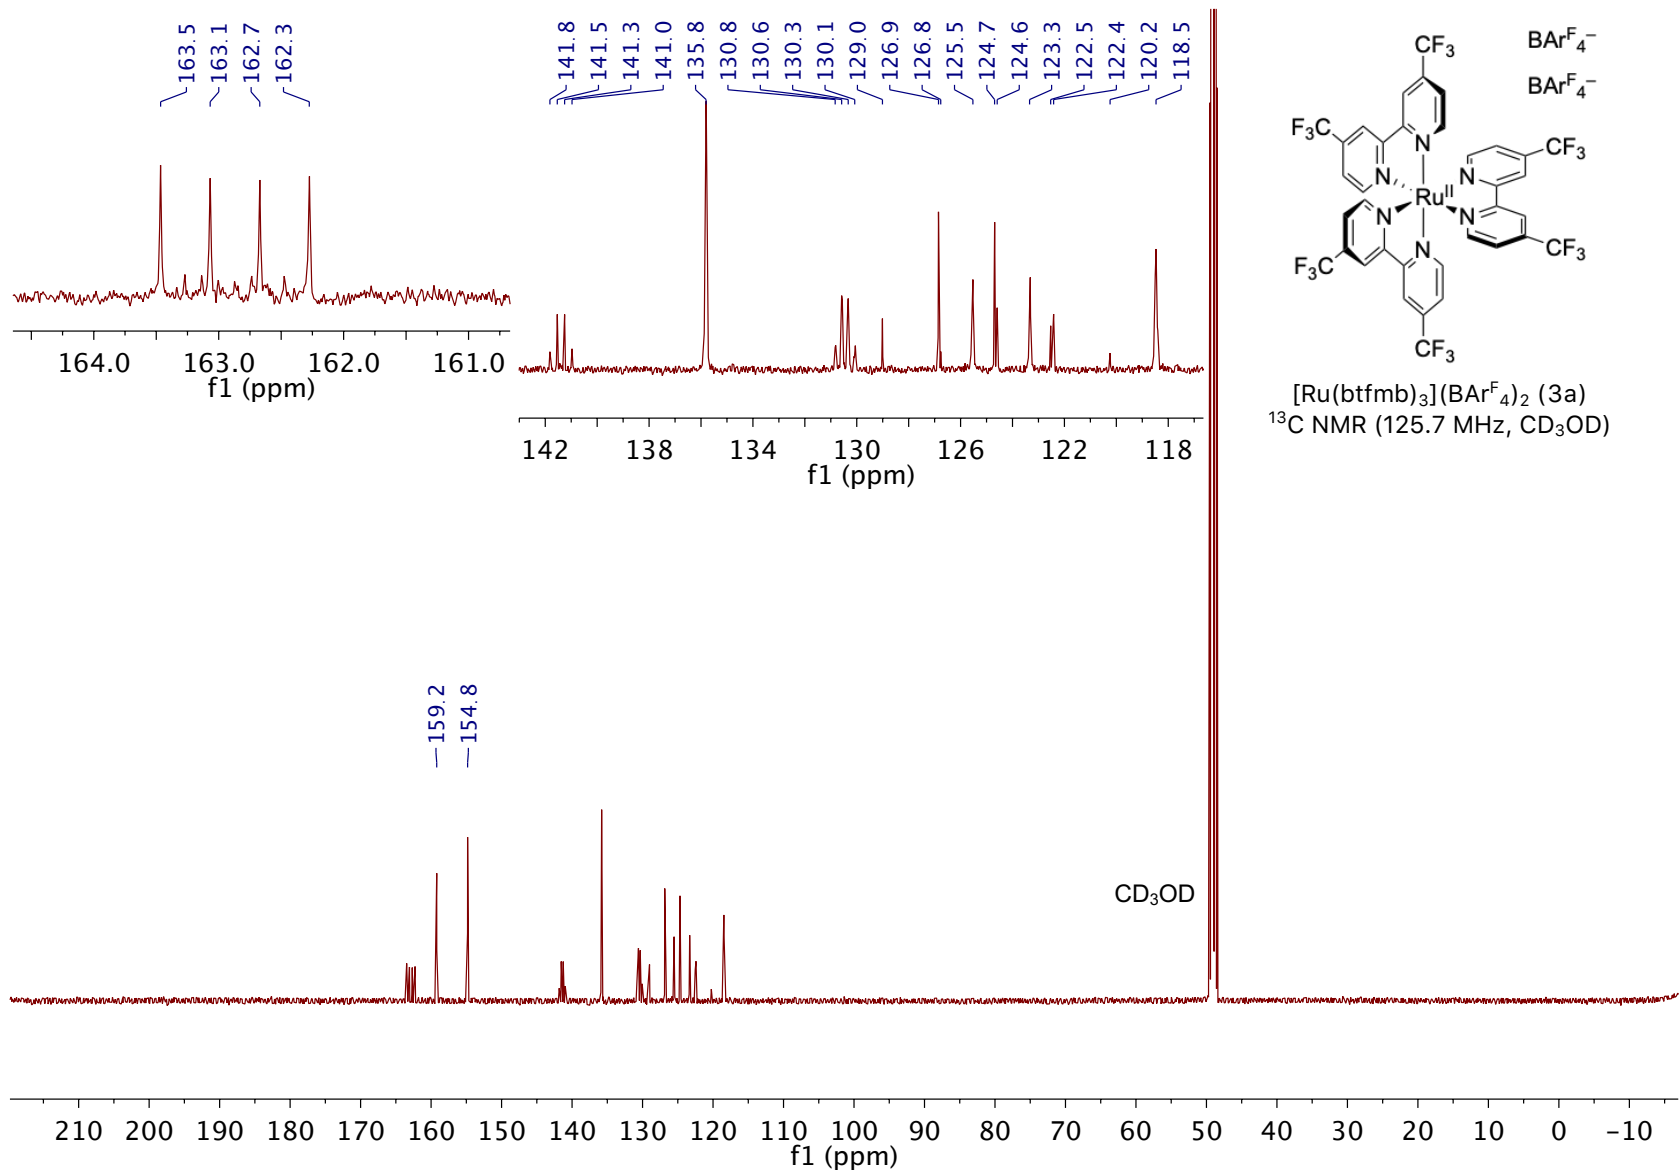

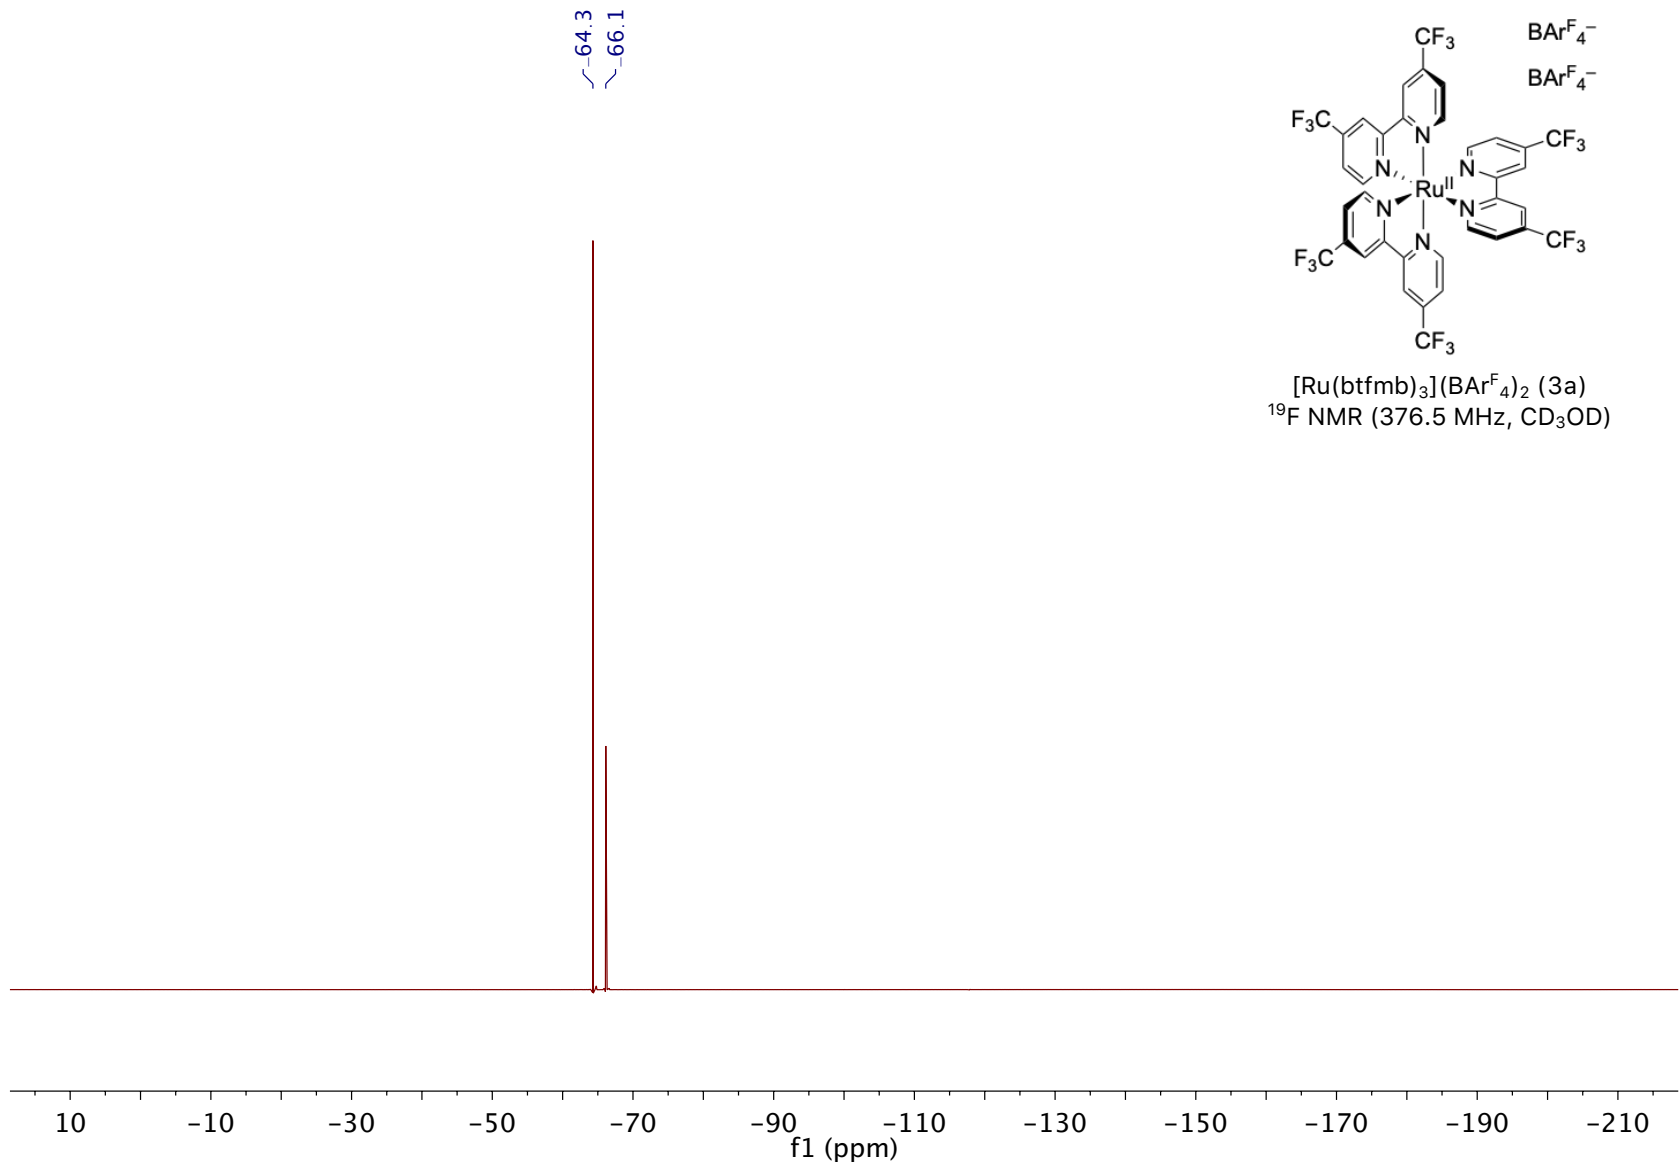

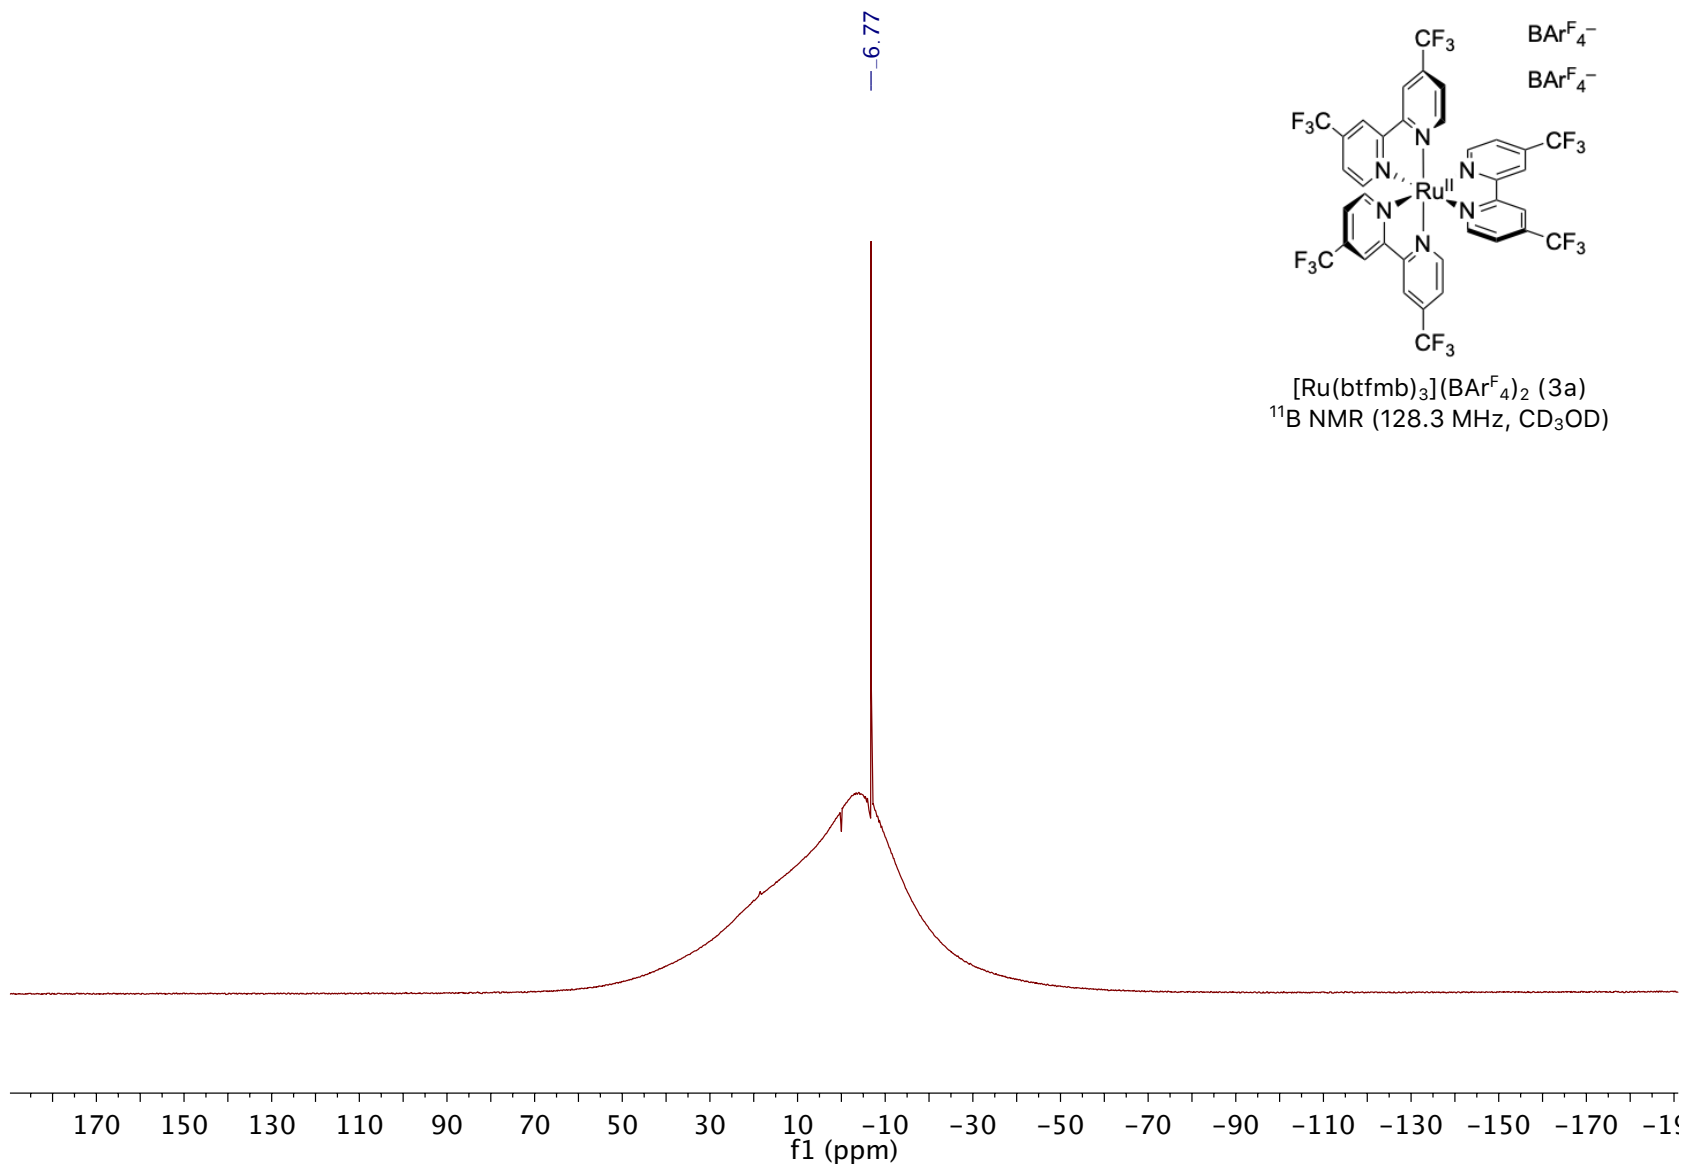

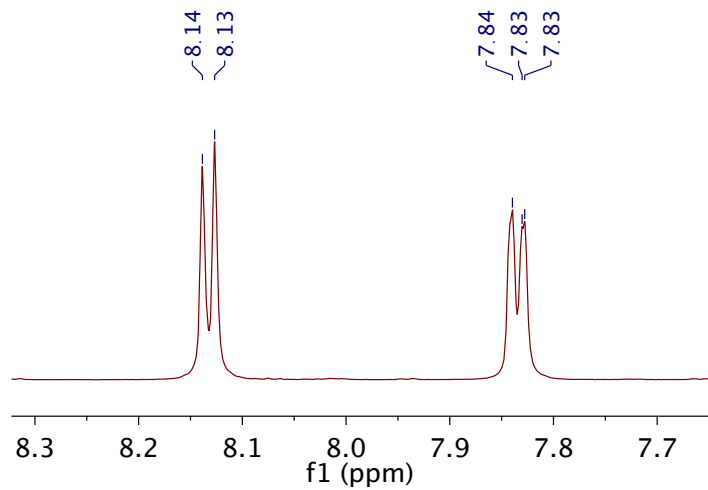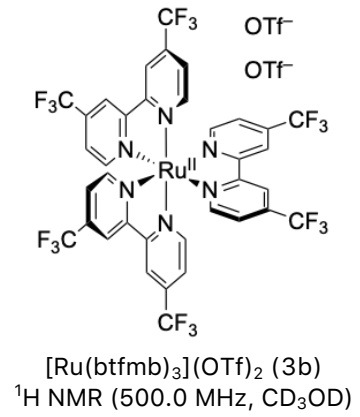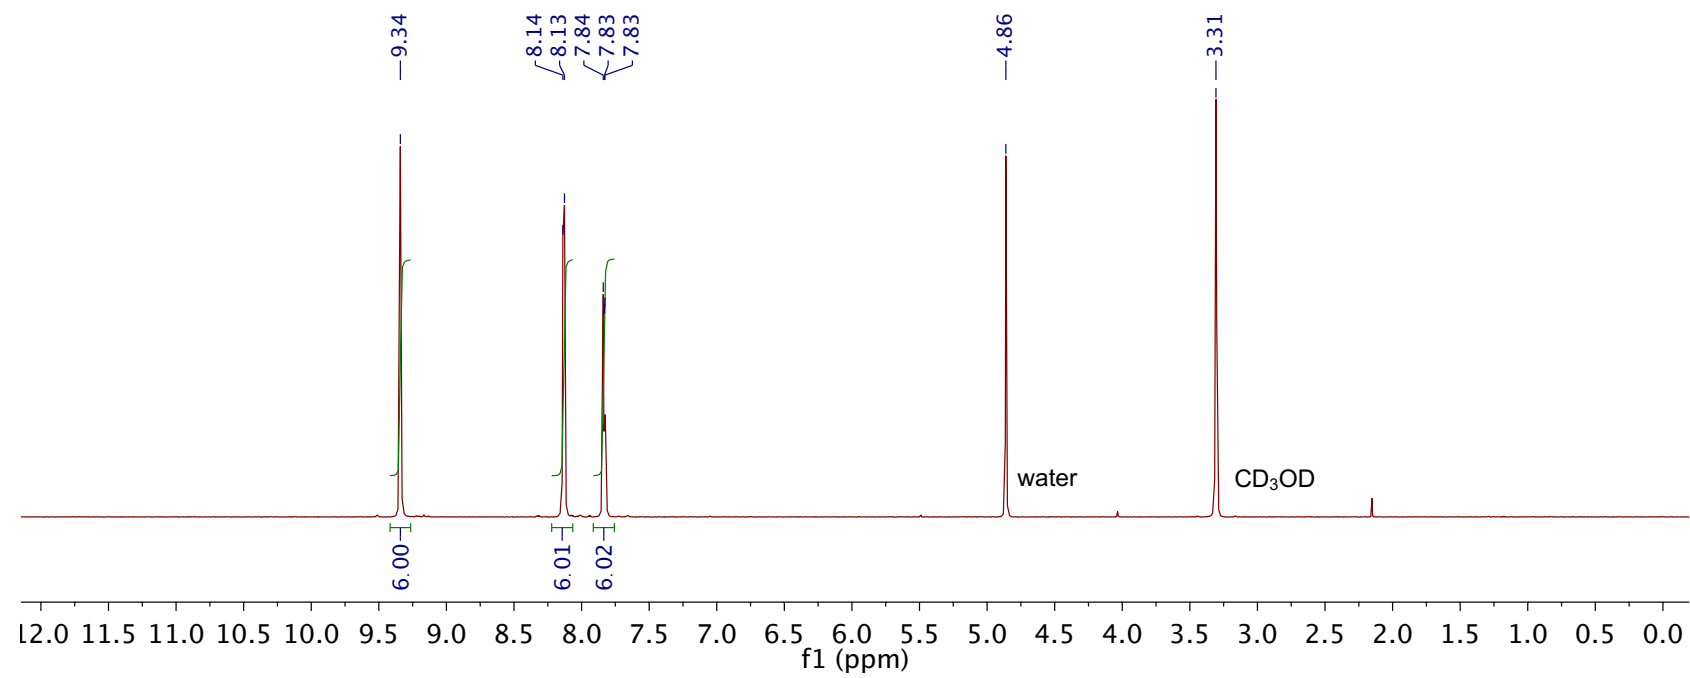

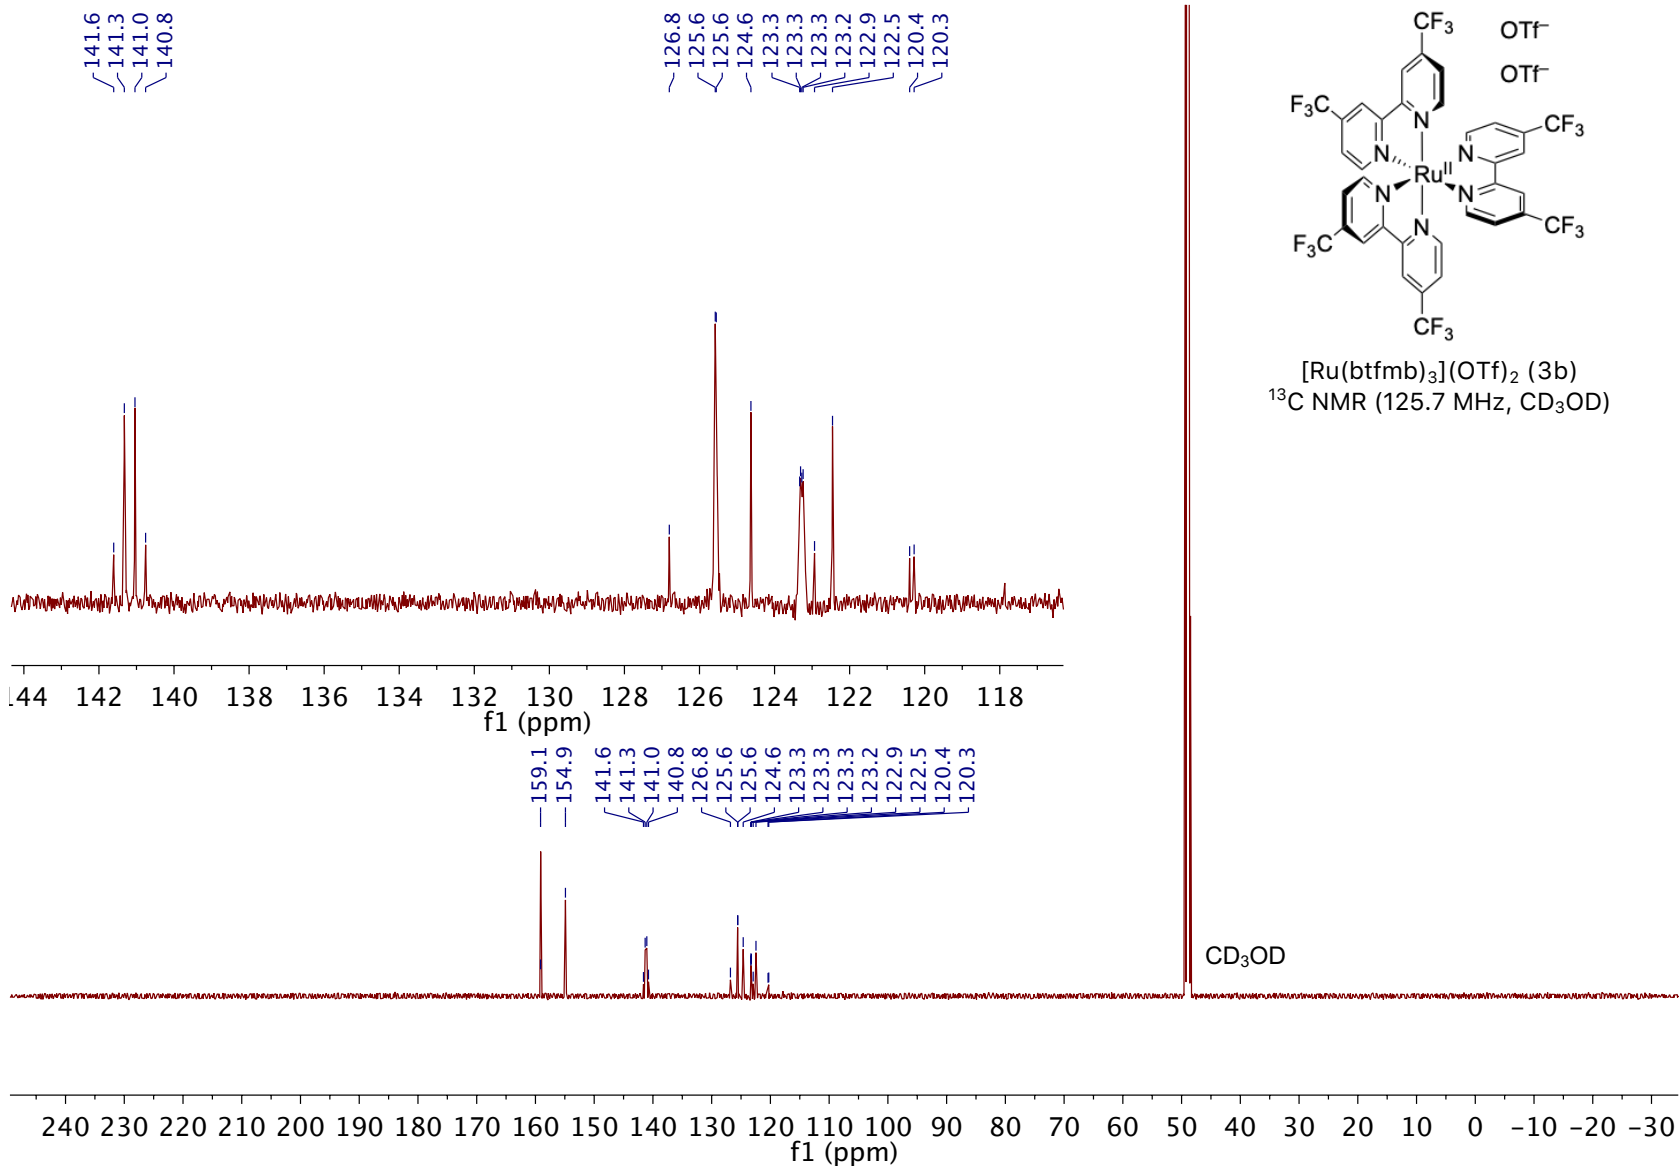

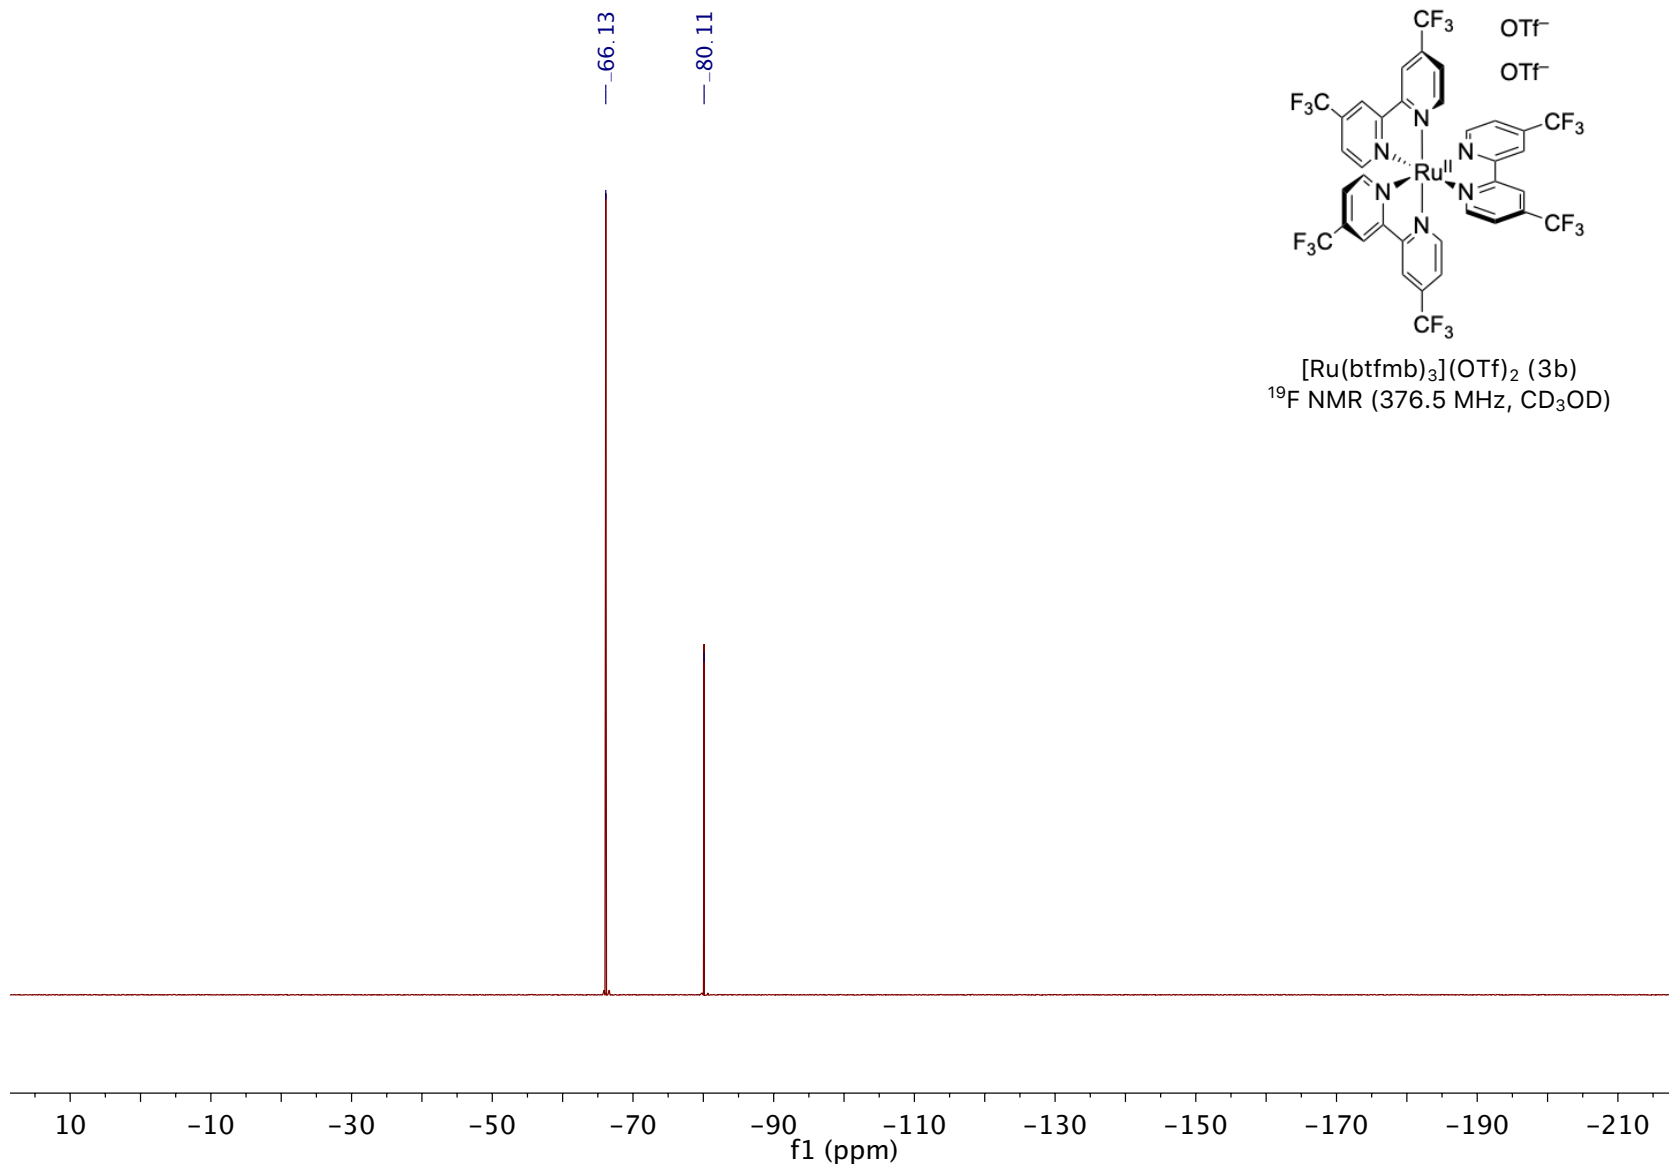

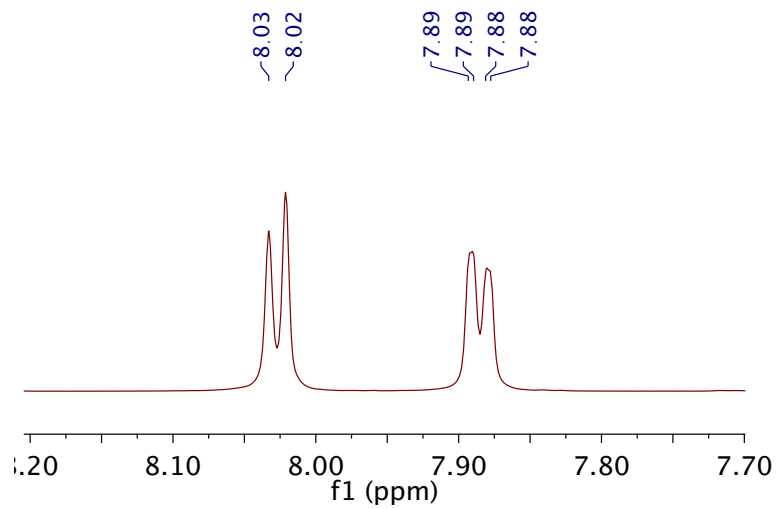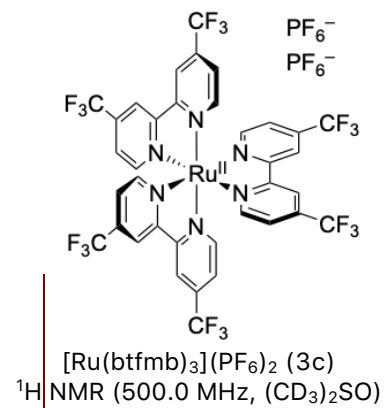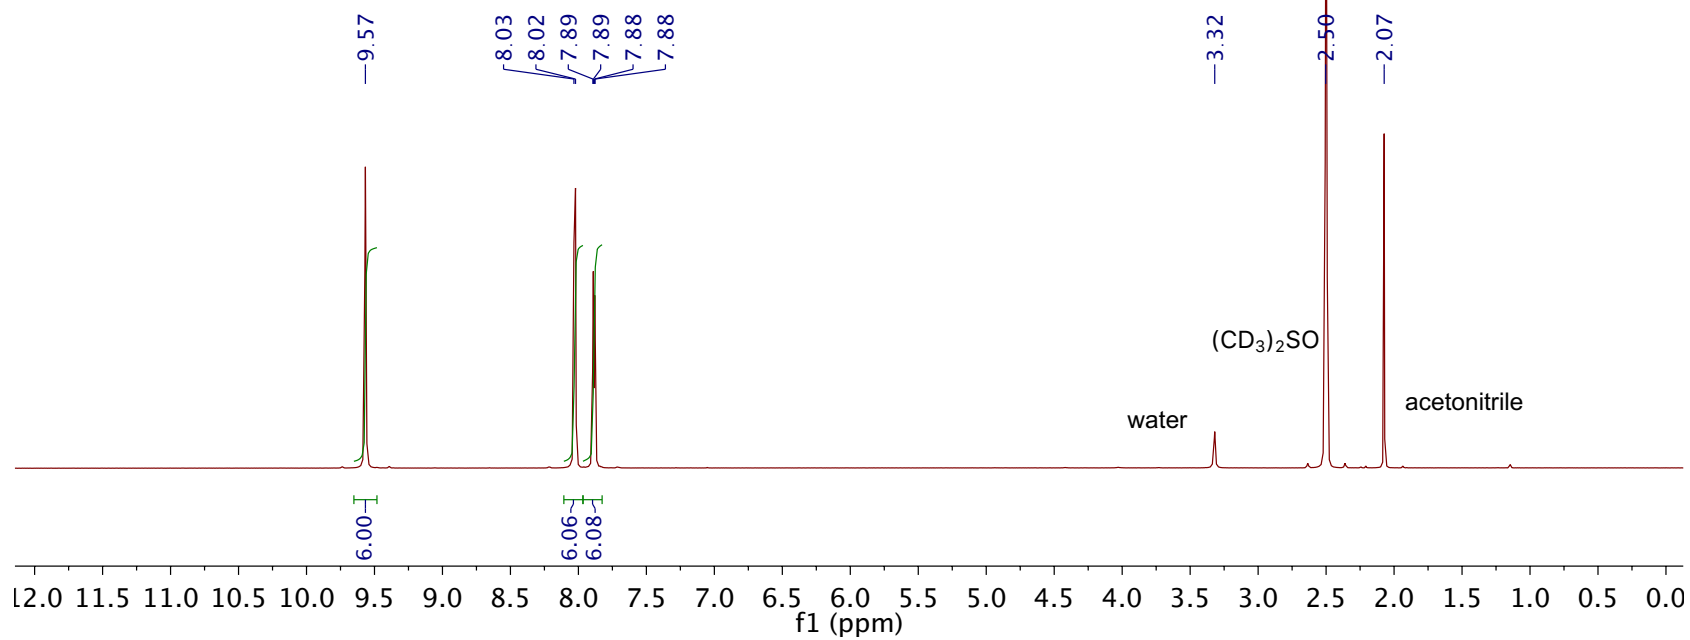

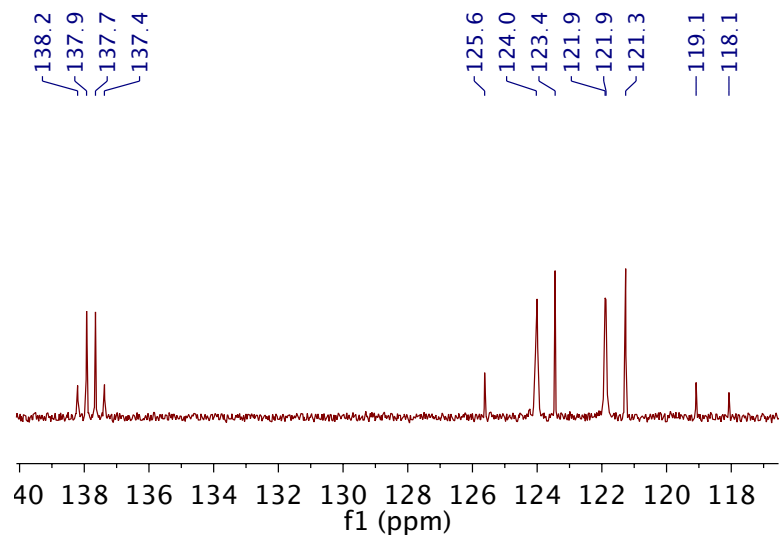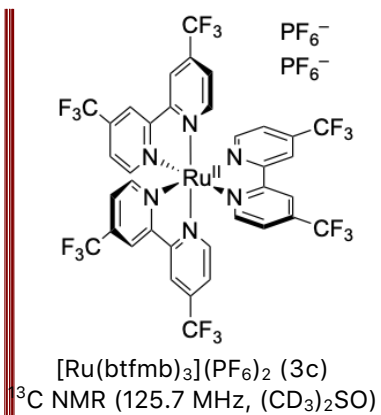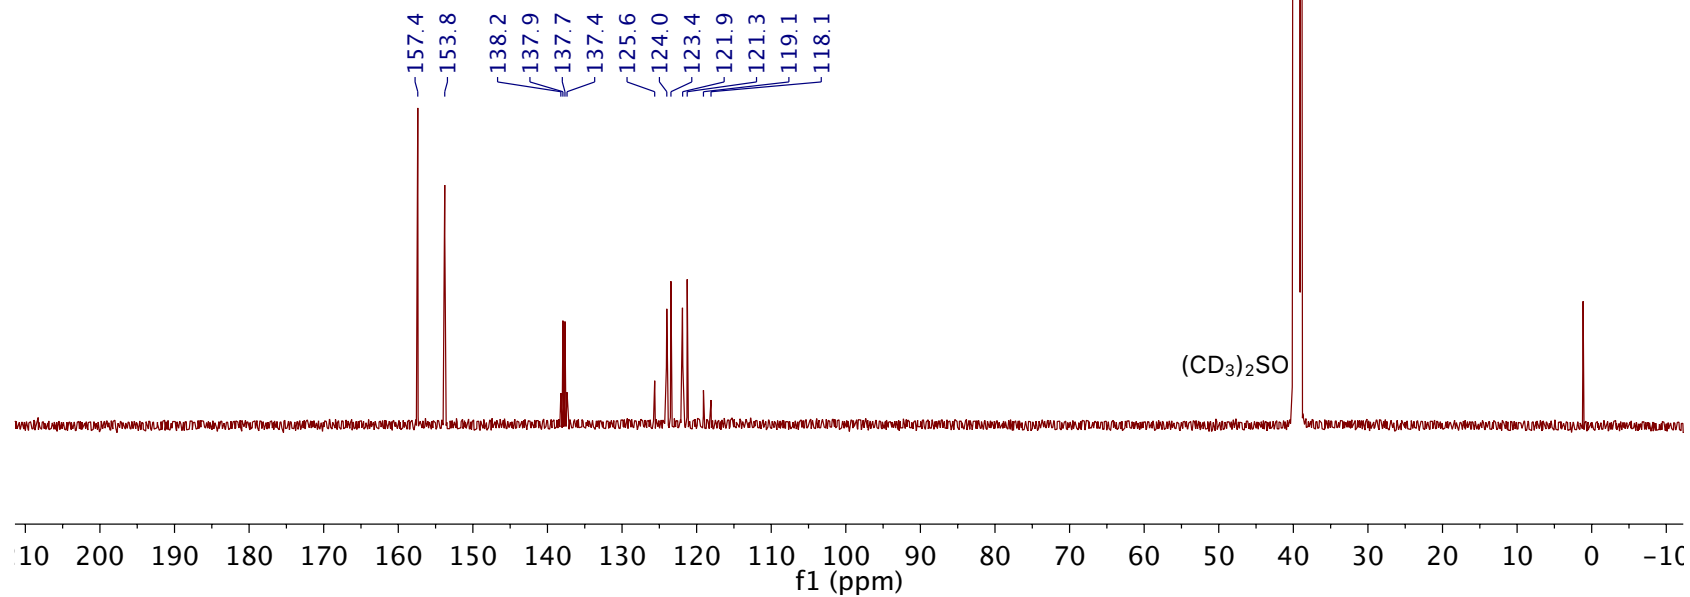



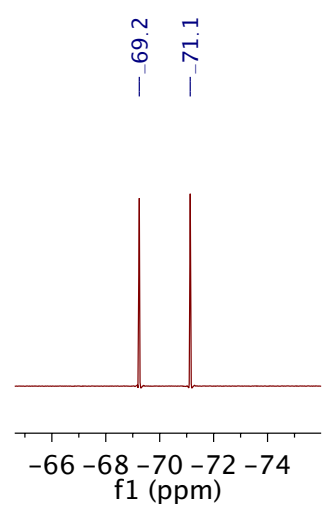

-63.0  
-69.2  
-71.1

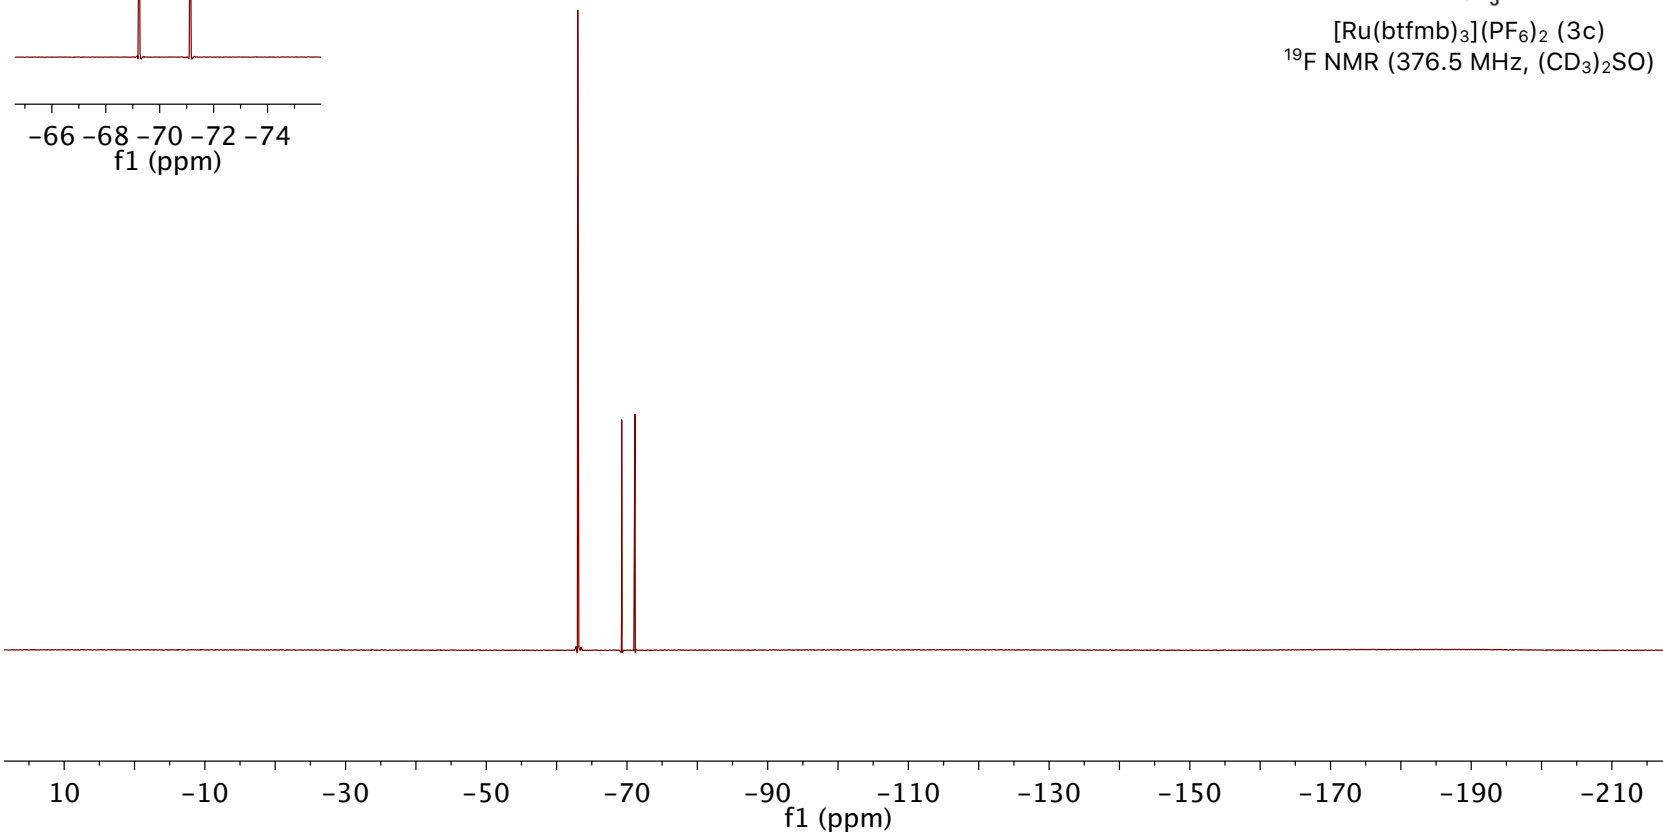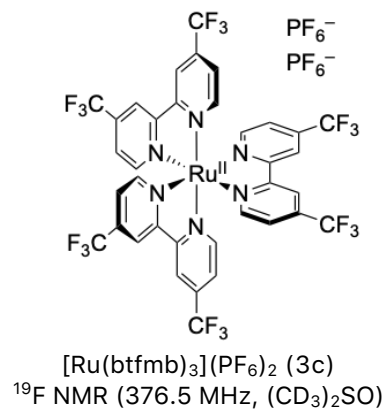

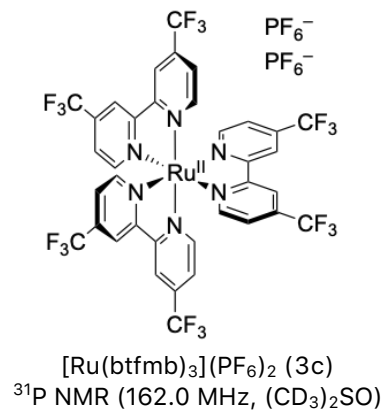

131.1  
135.4  
139.8  
144.2  
148.6  
153.0  
157.4

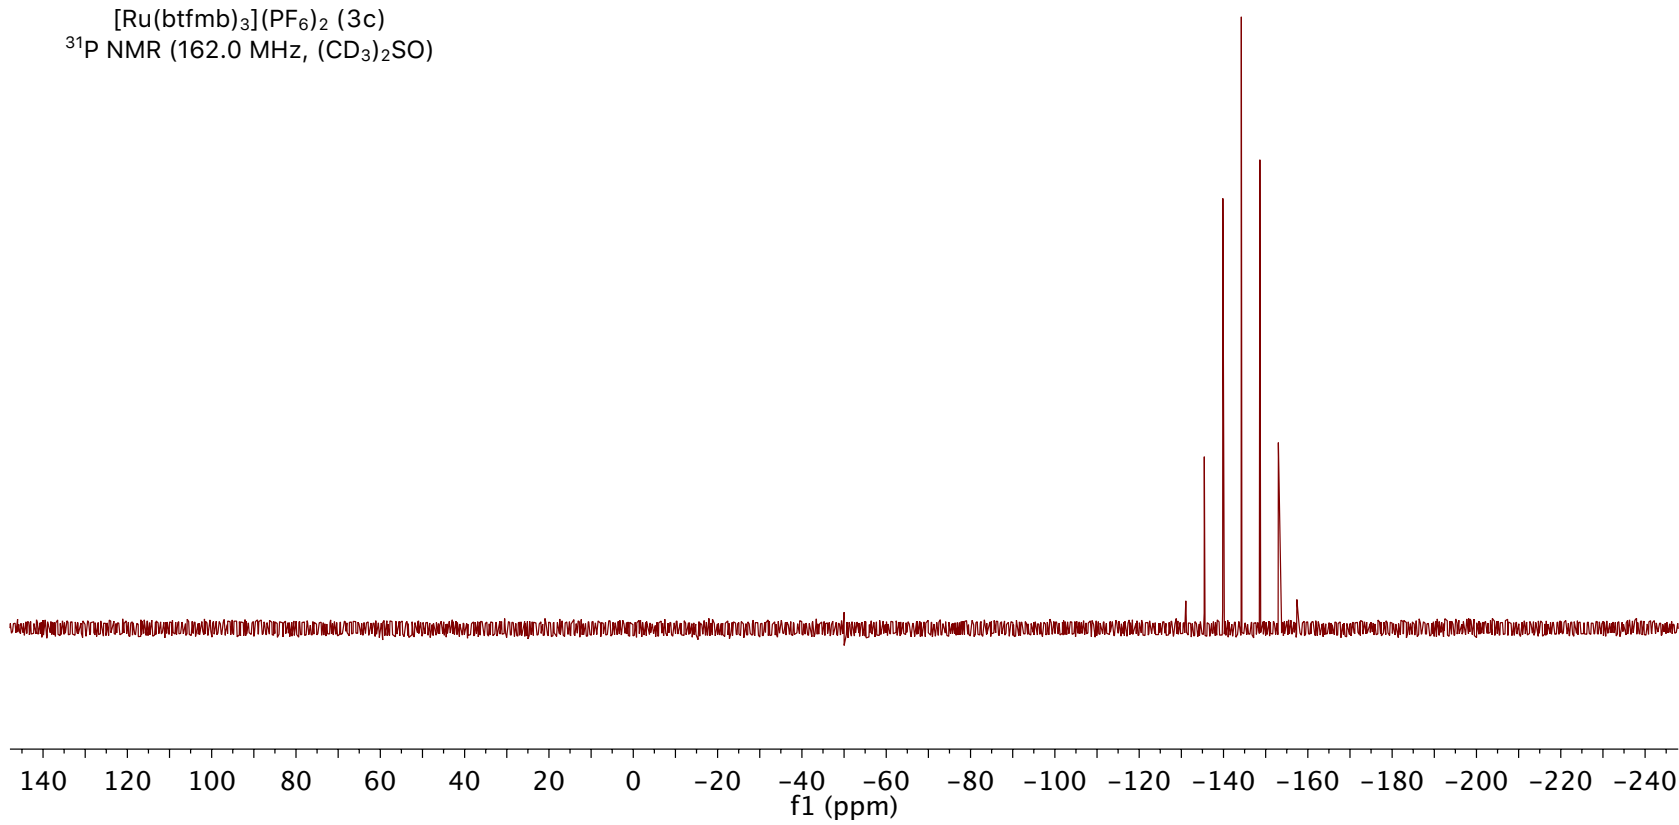

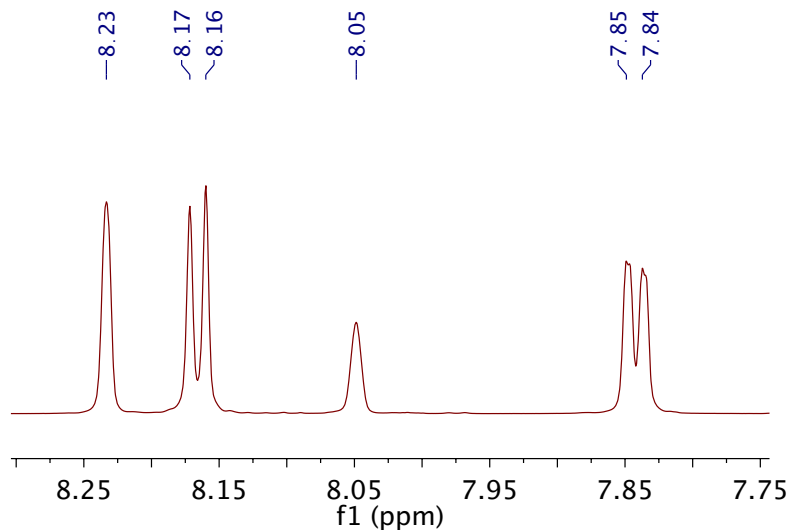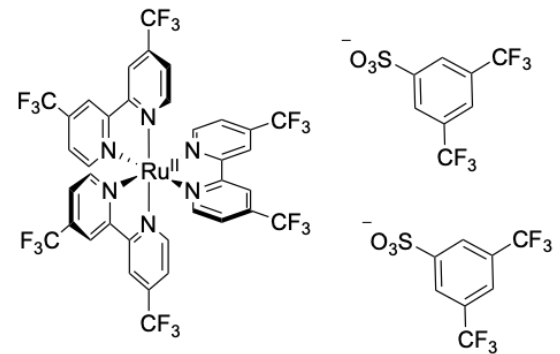

[Ru(btmb)<sub>3</sub>](Ar<sup>F</sup>SO<sub>3</sub>)<sub>2</sub> (3d)  
<sup>1</sup>H NMR (500.0 MHz, CD<sub>3</sub>OD)

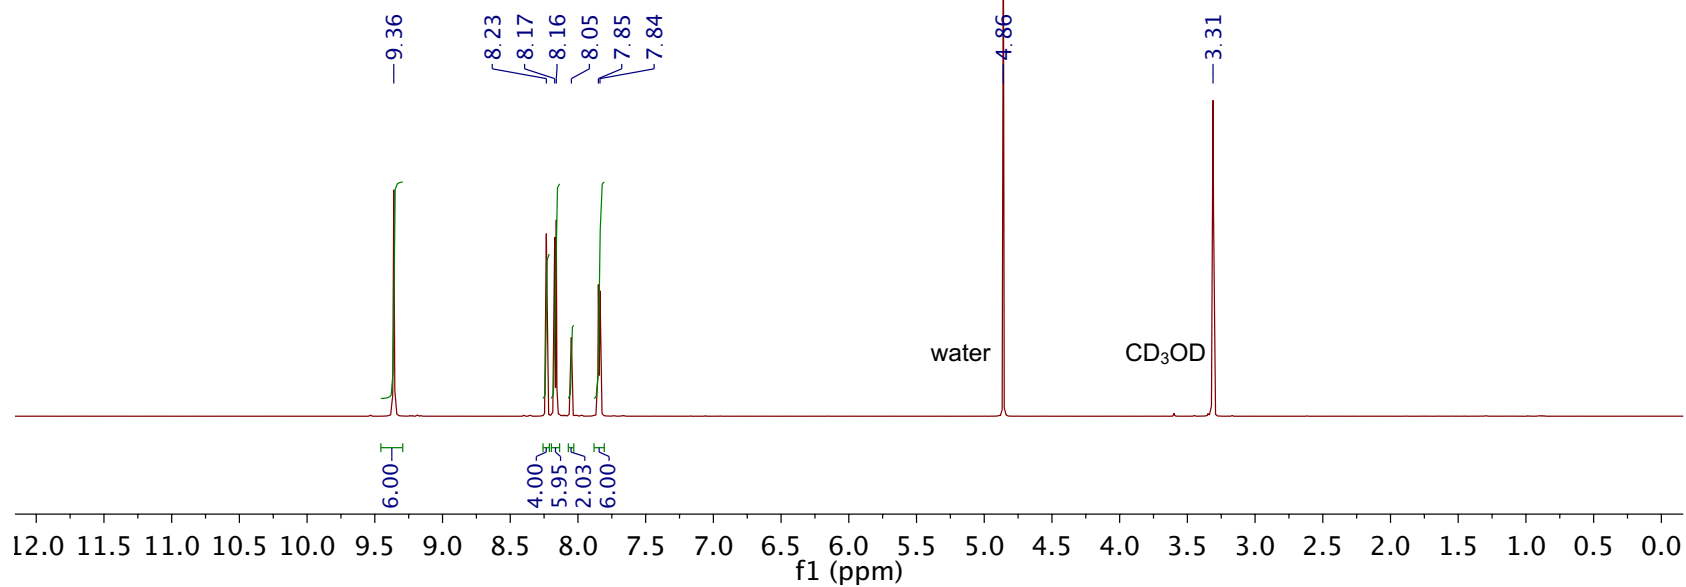

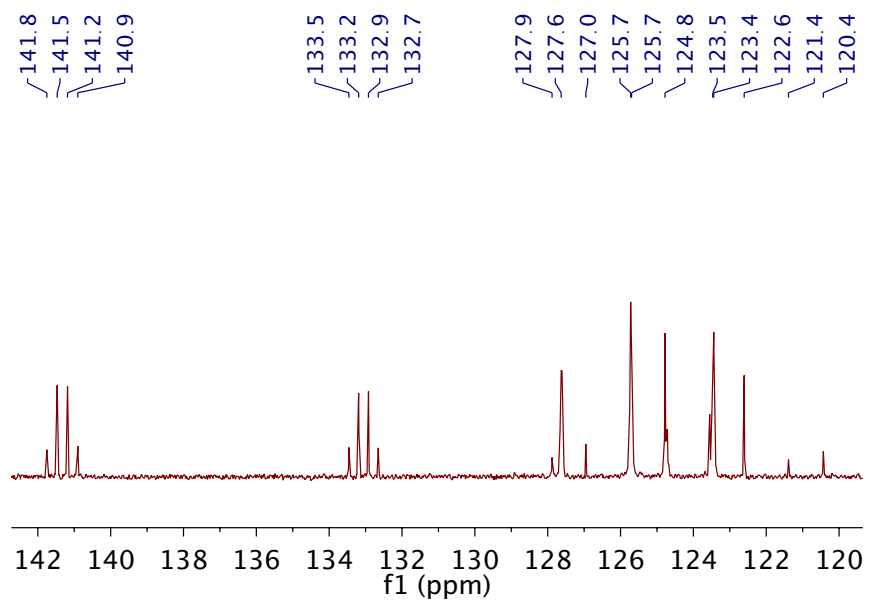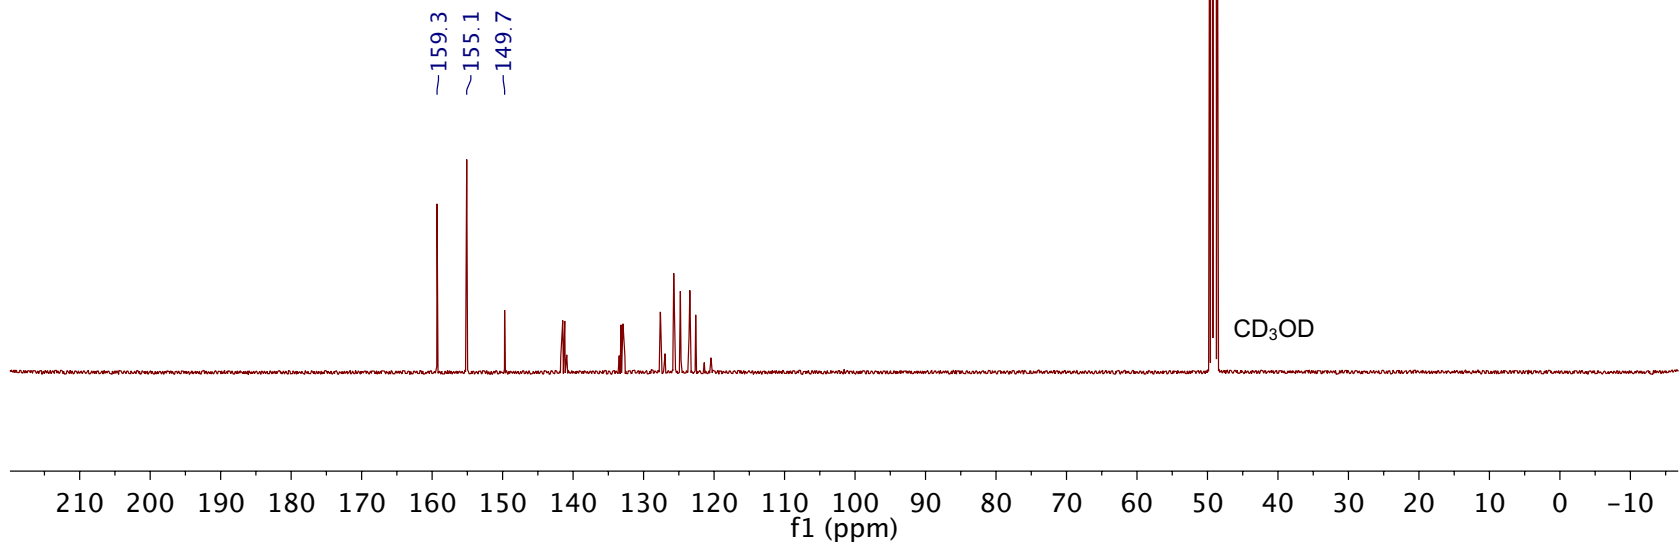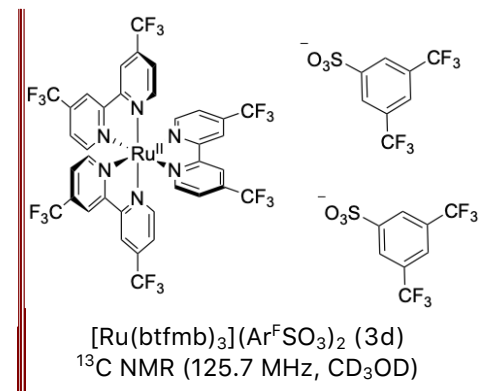

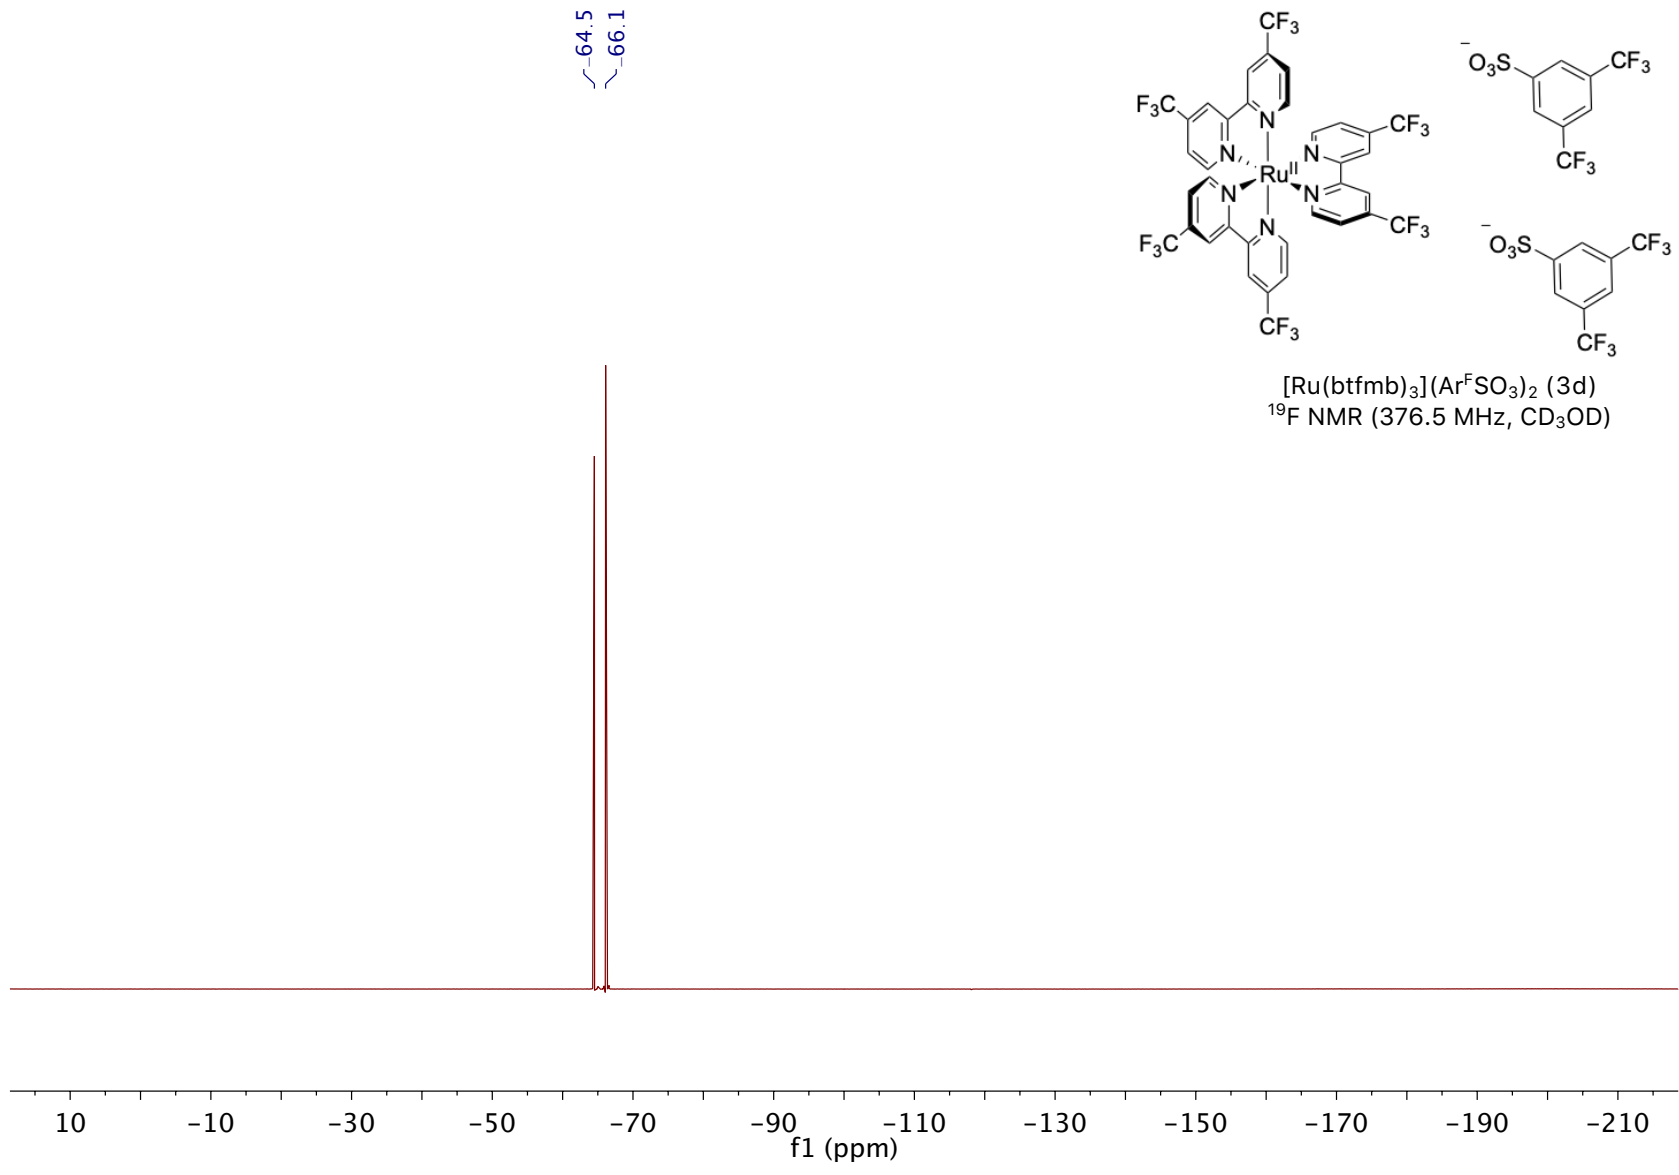

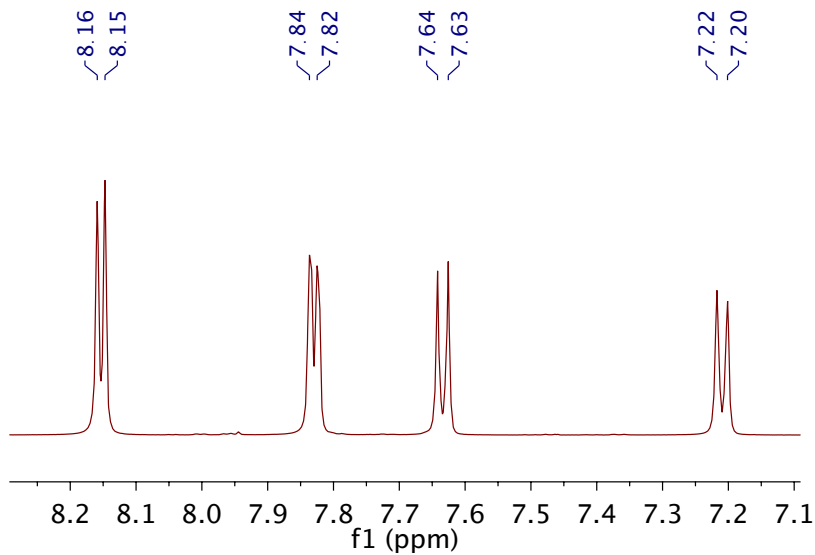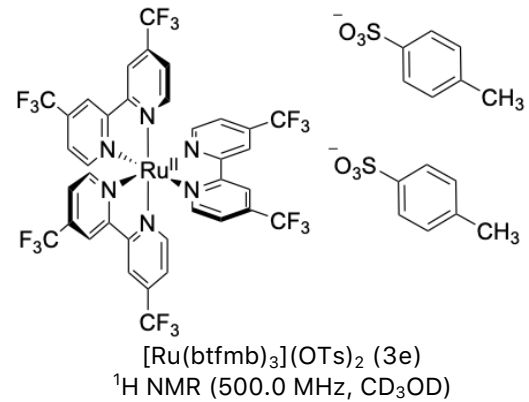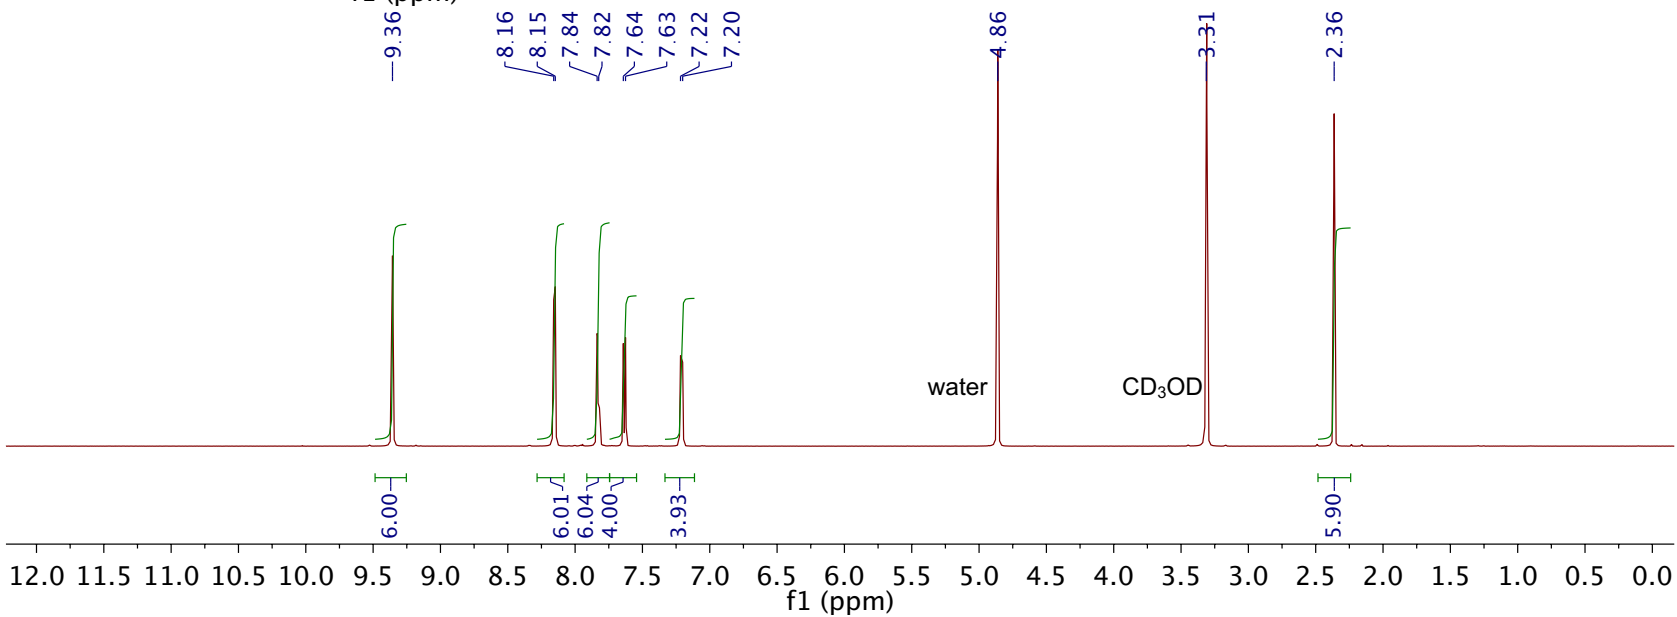

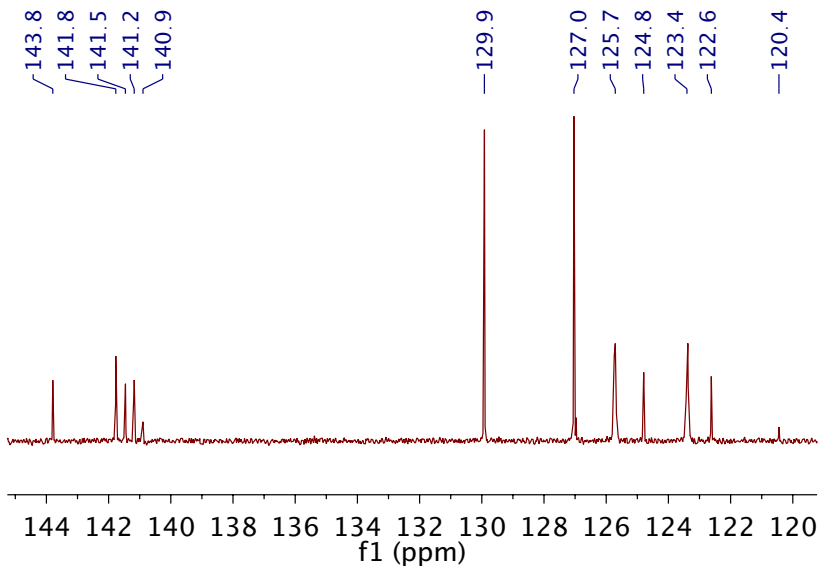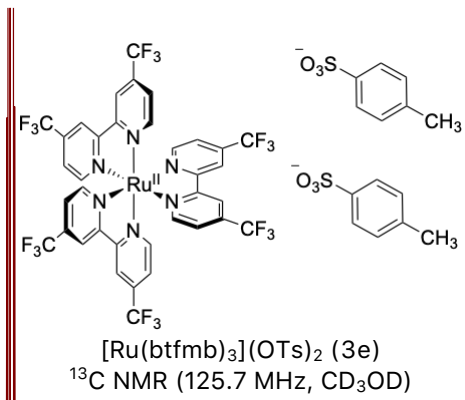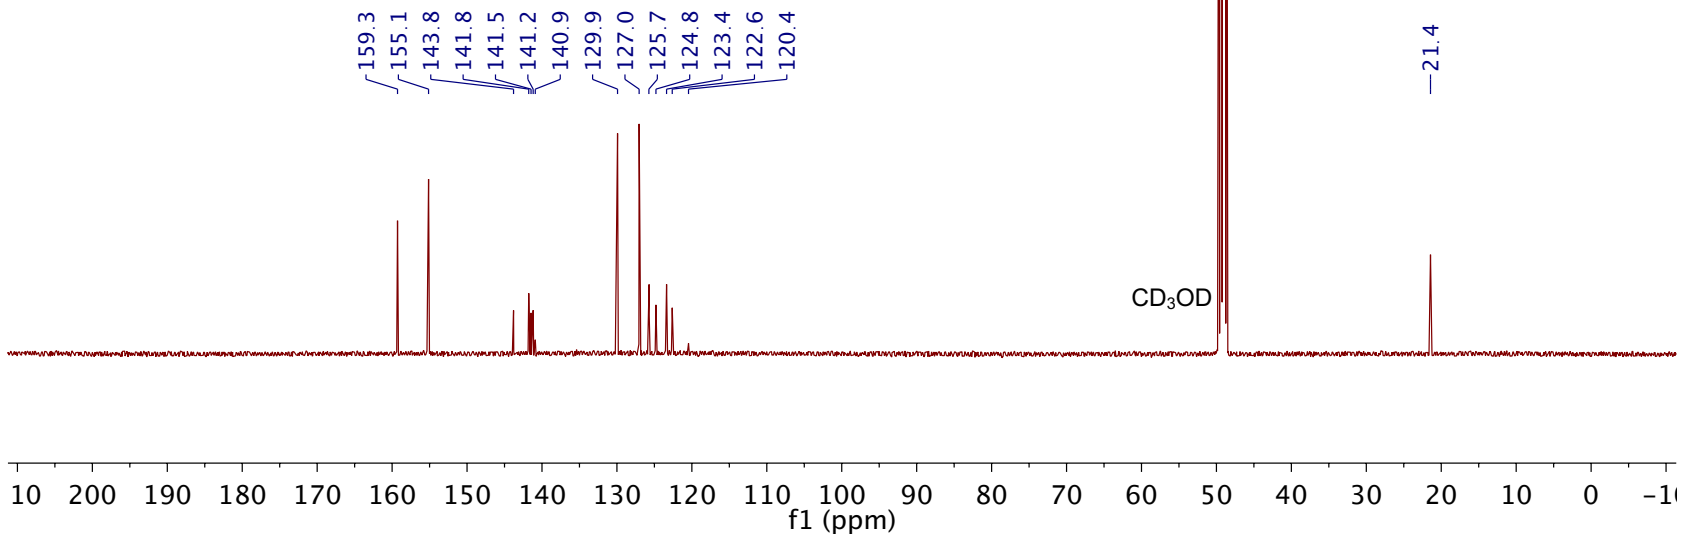

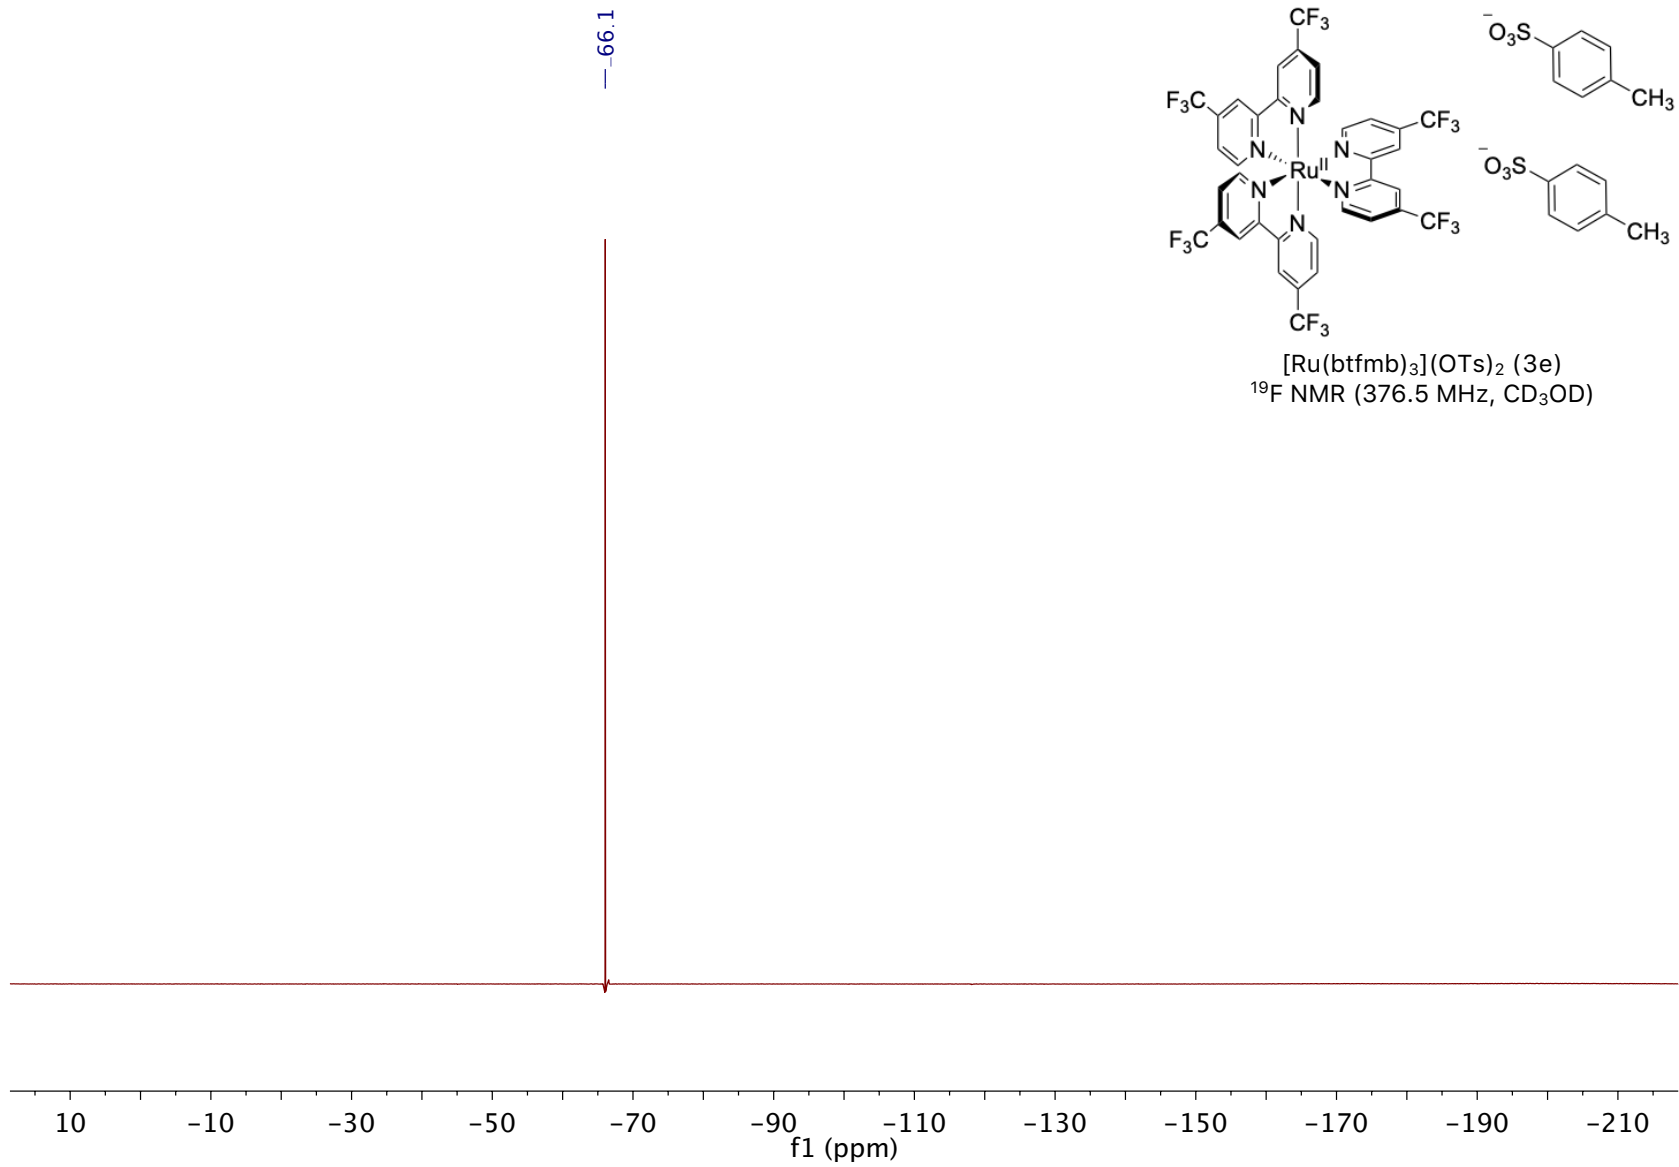



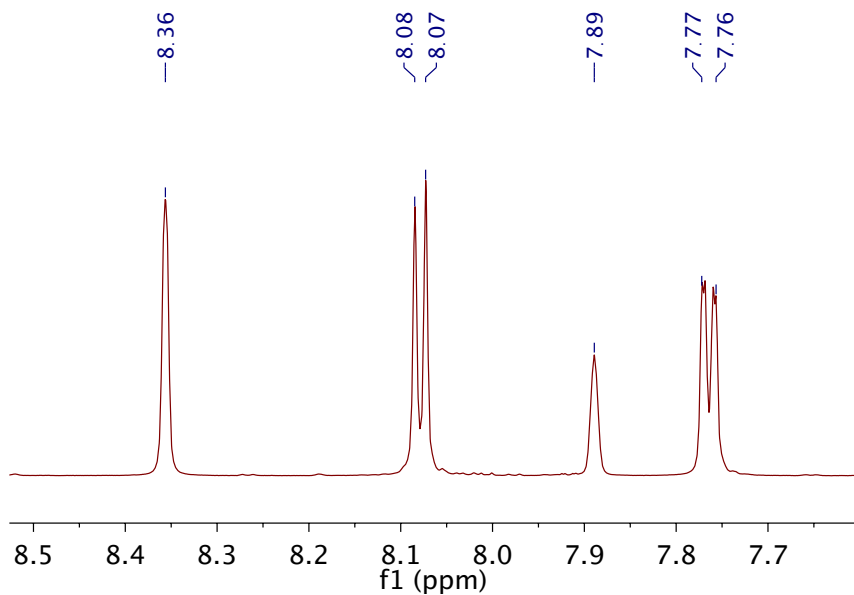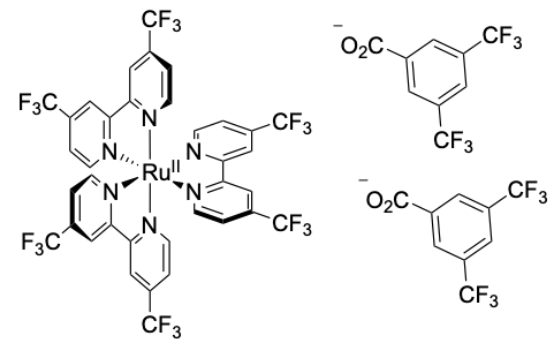

[Ru(btmb)<sub>3</sub>](Ar<sup>F</sup>CO<sub>2</sub>)<sub>2</sub> (3f)  
<sup>1</sup>H NMR (500.0 MHz, CD<sub>3</sub>OD)

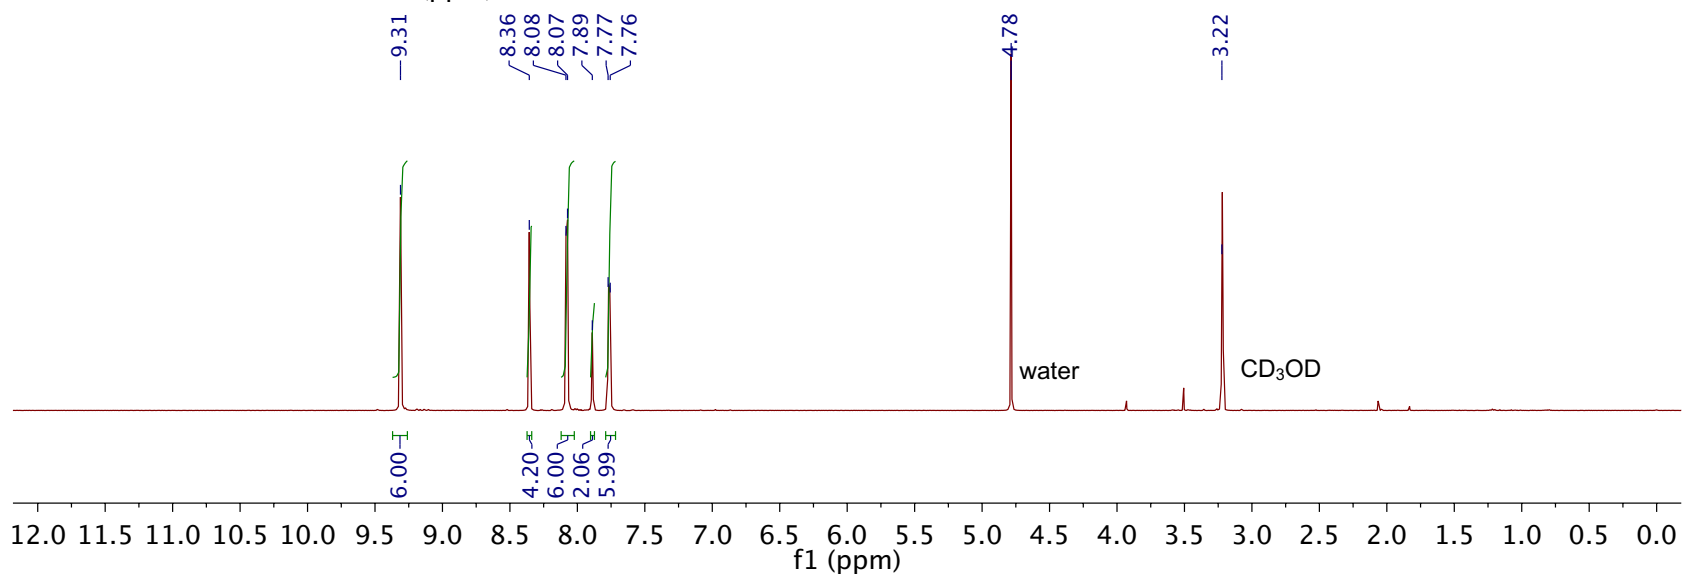

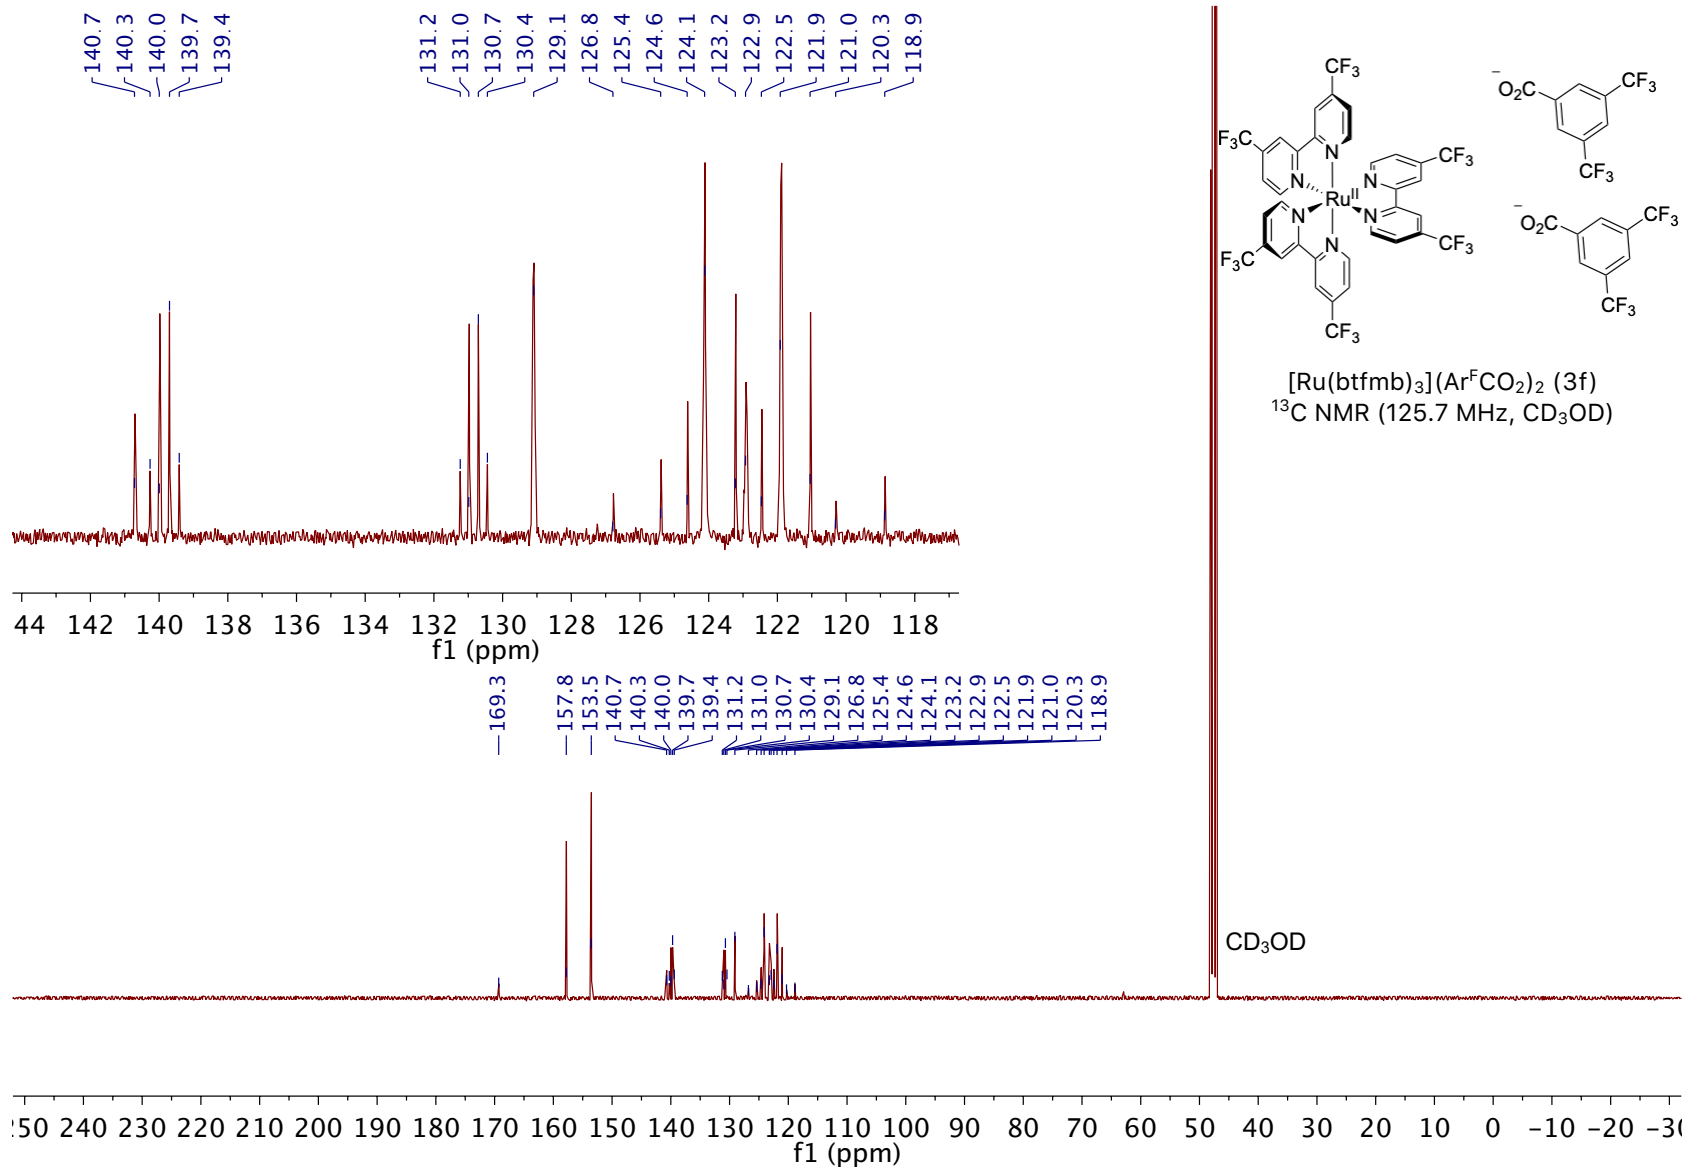

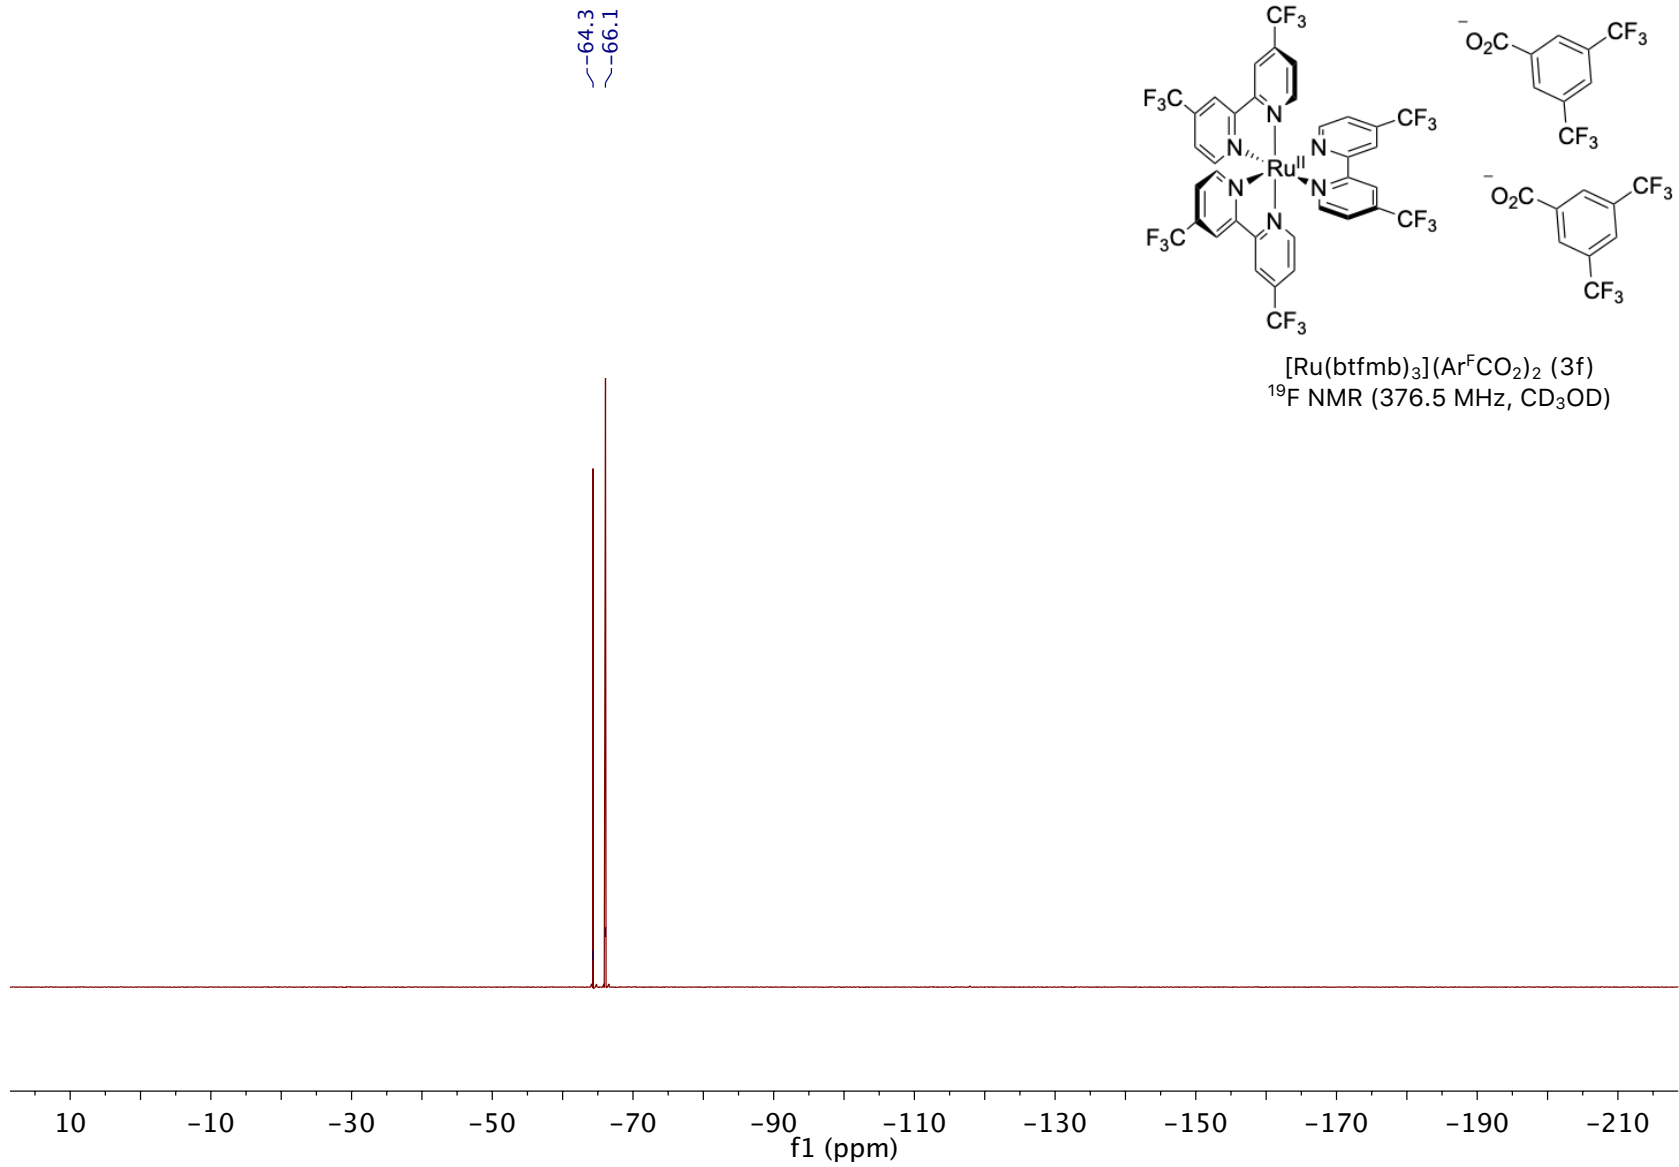

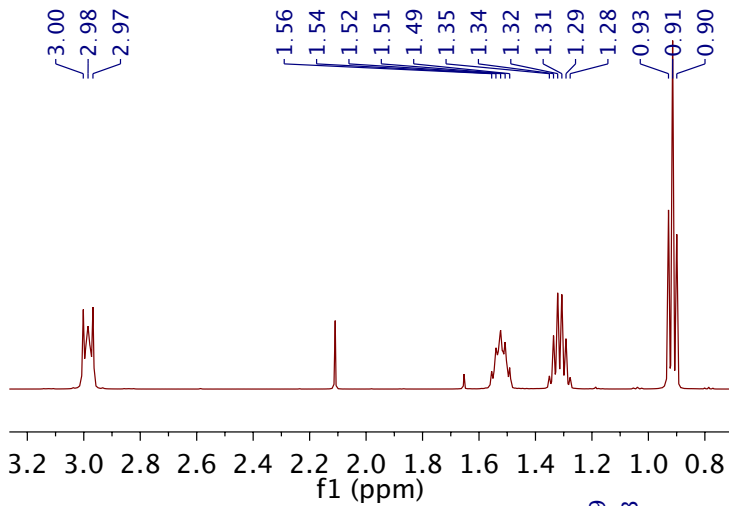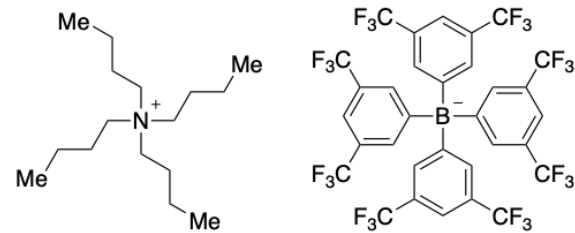

tetrabutylammonium tetrakis-(3,5-bis(trifluoromethyl)phenyl)borate (S6)  
 $^1\text{H}$  NMR (500.0 MHz,  $\text{CDCl}_3$ )

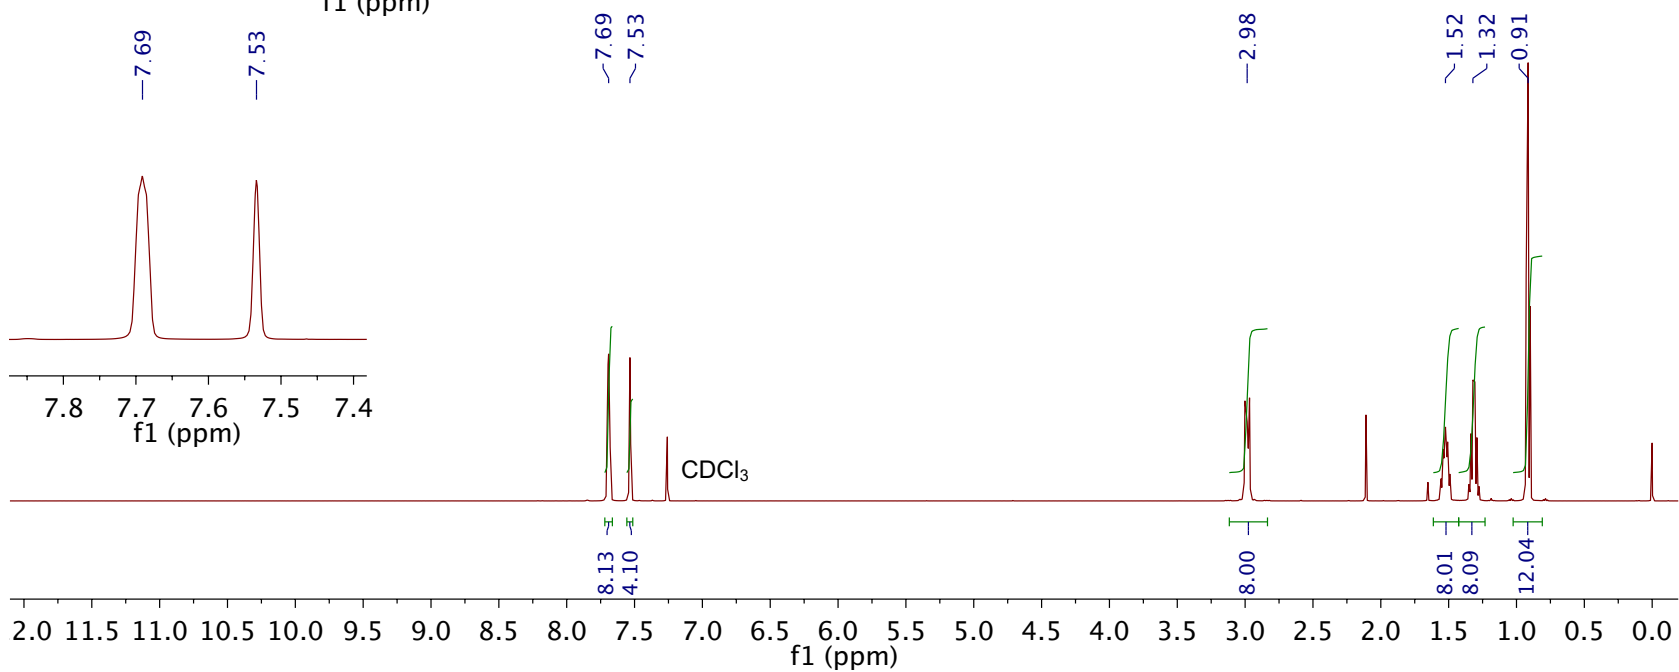

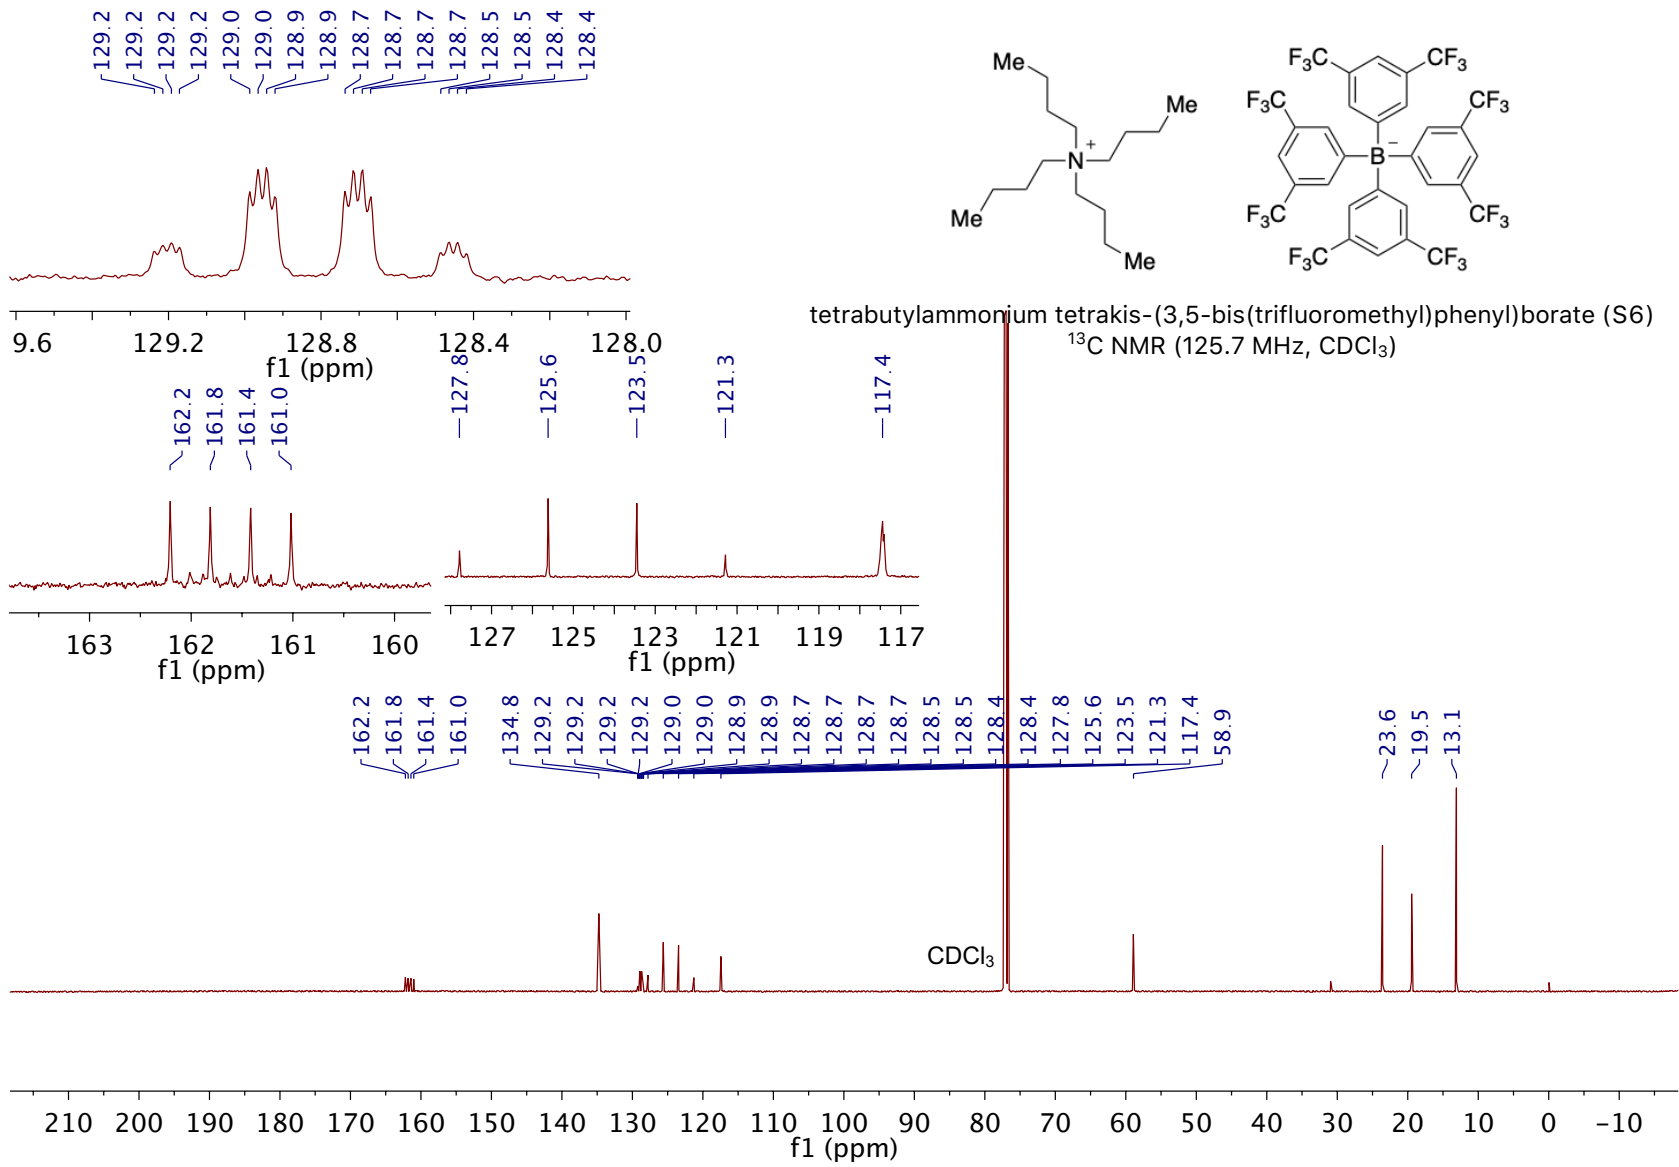

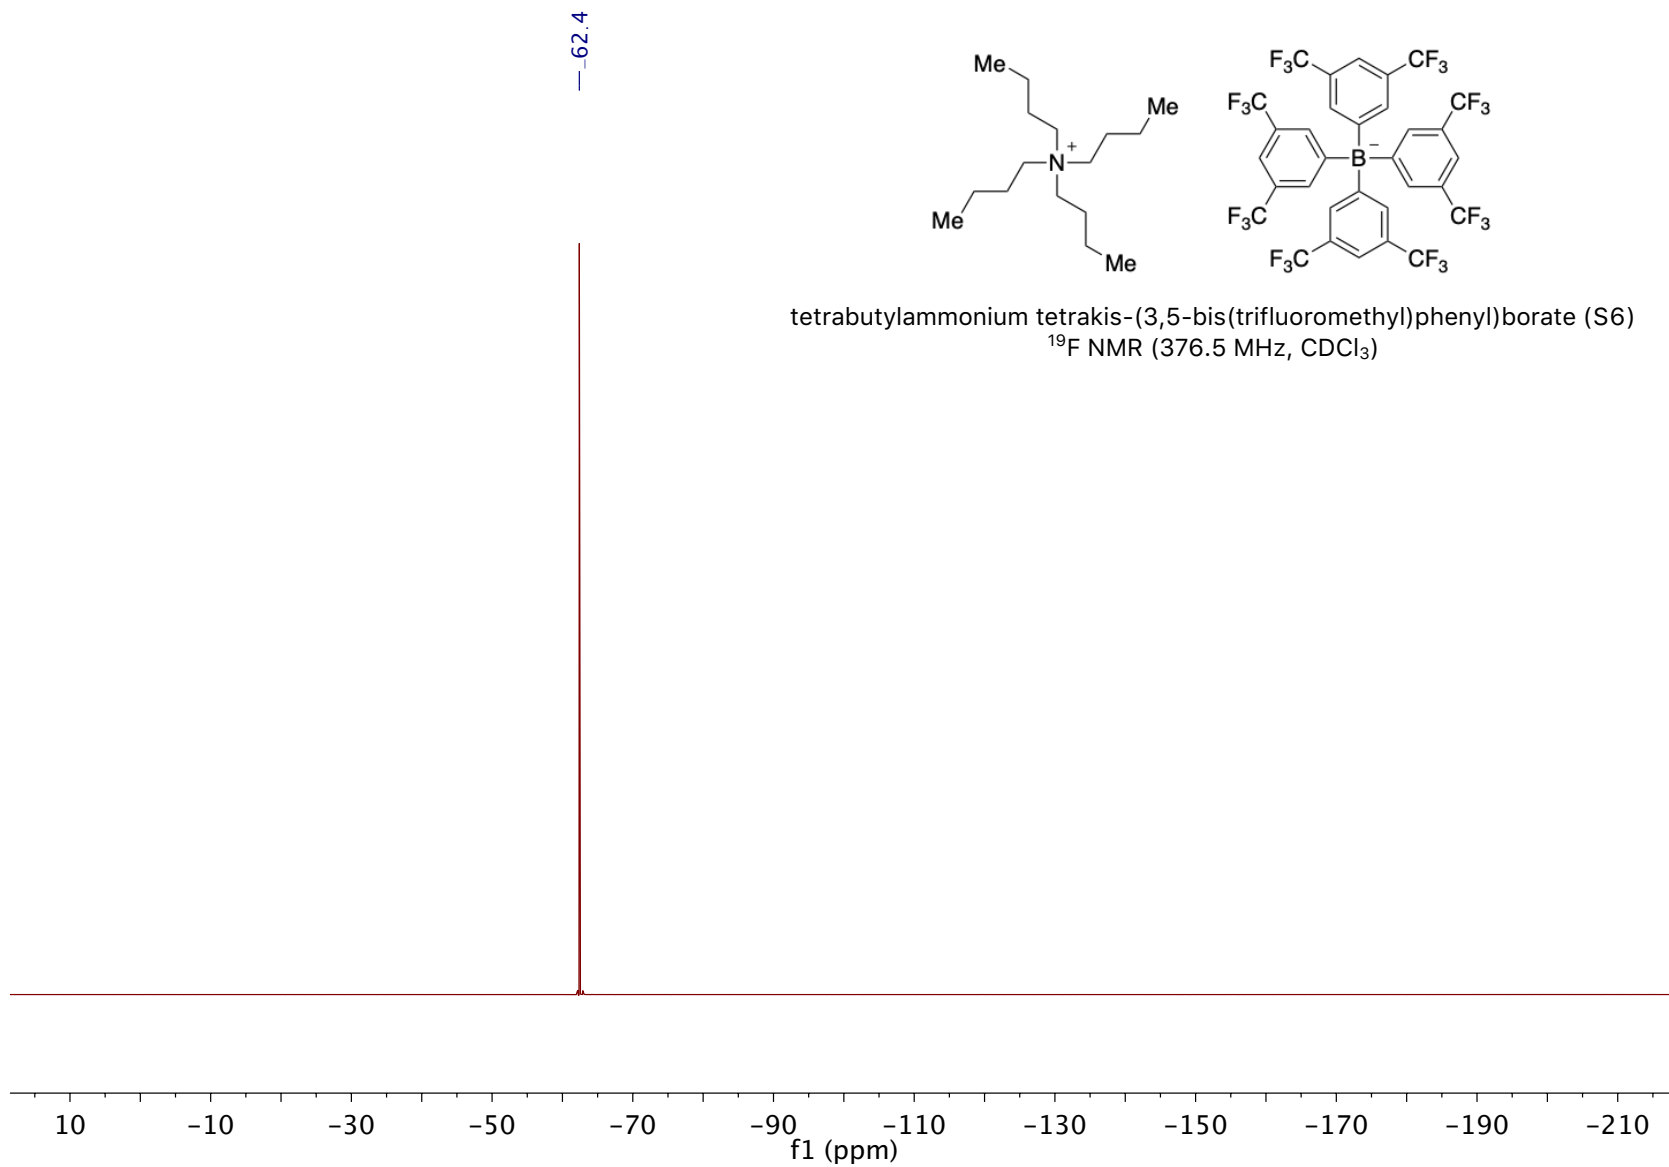

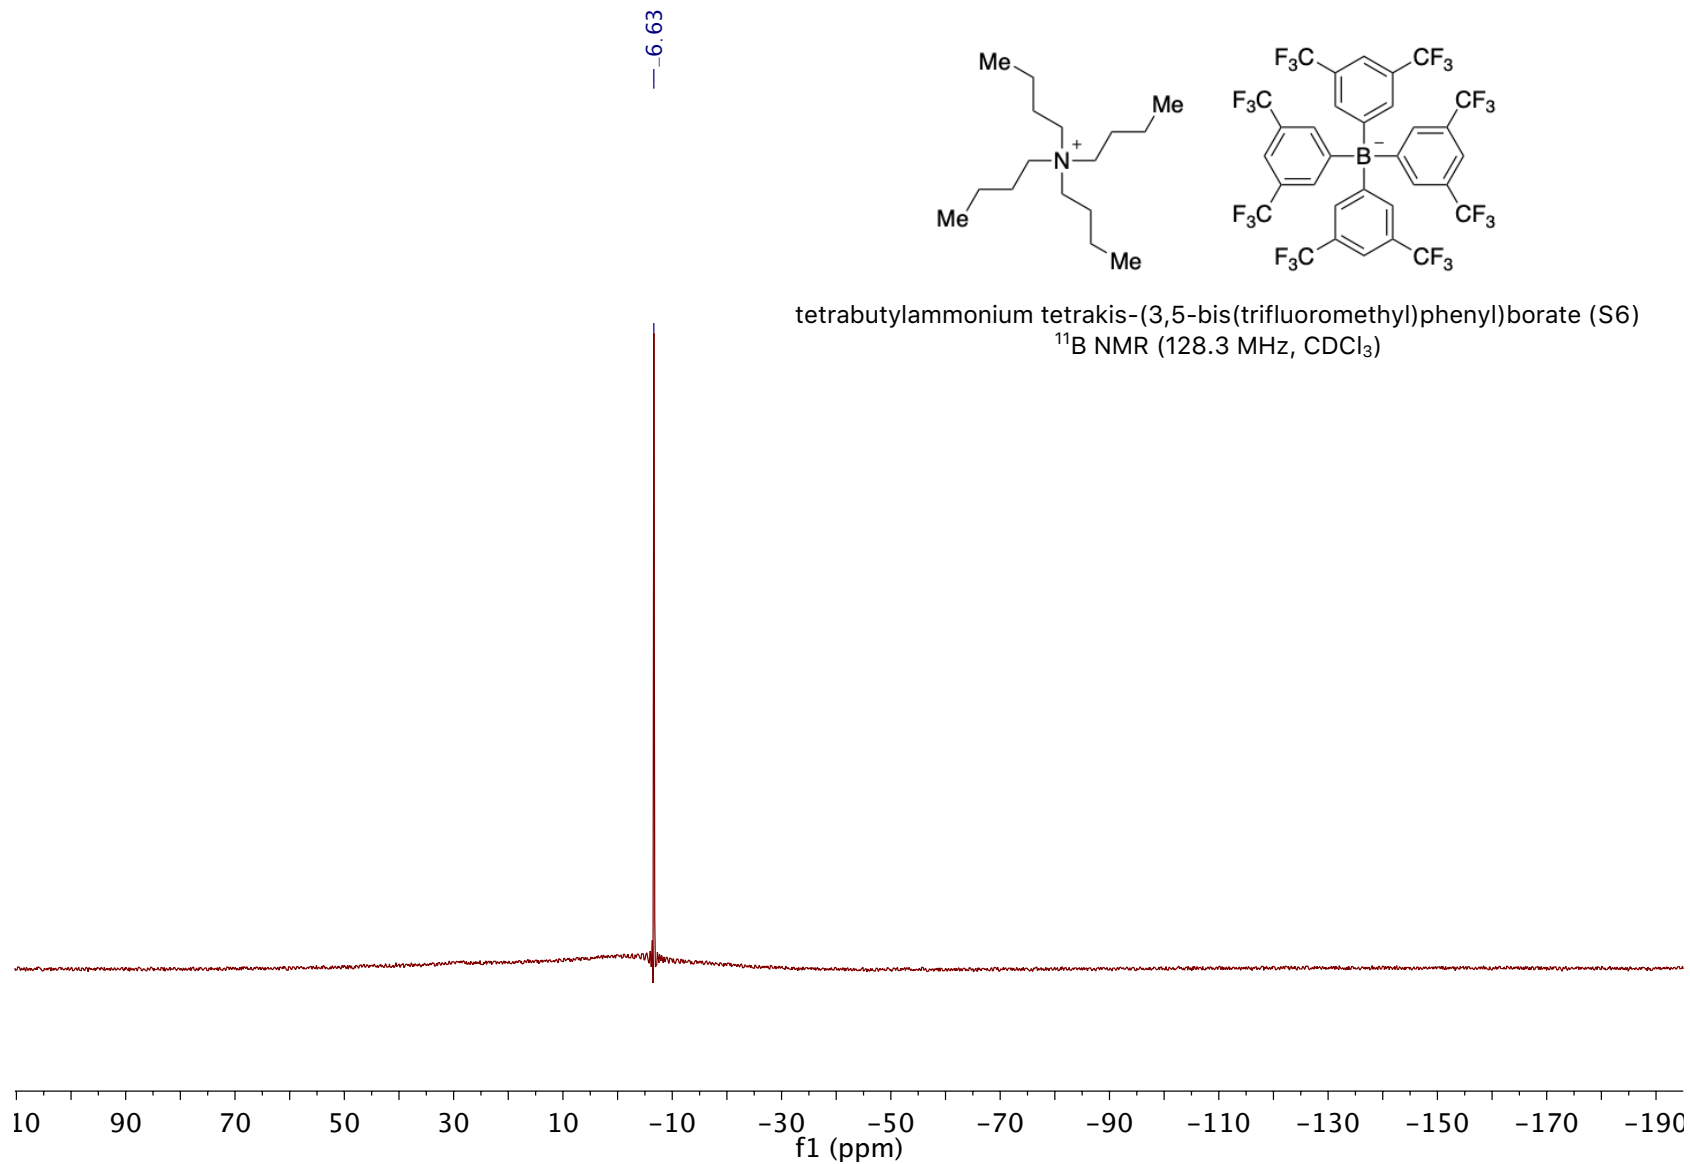

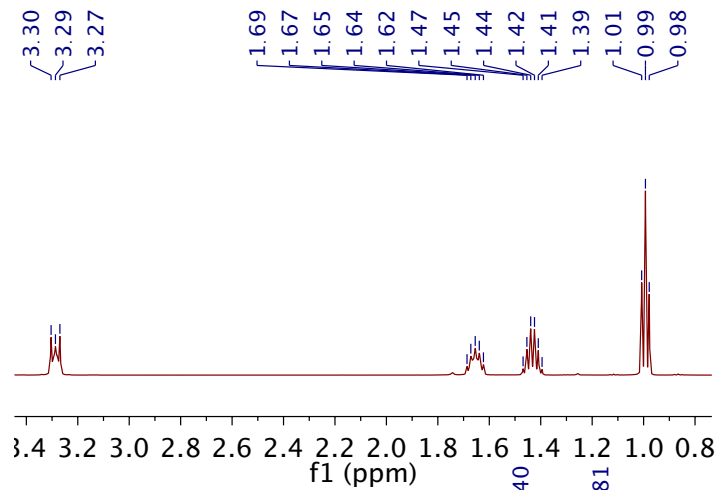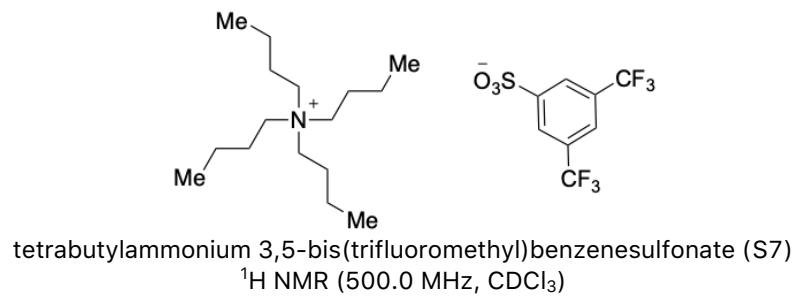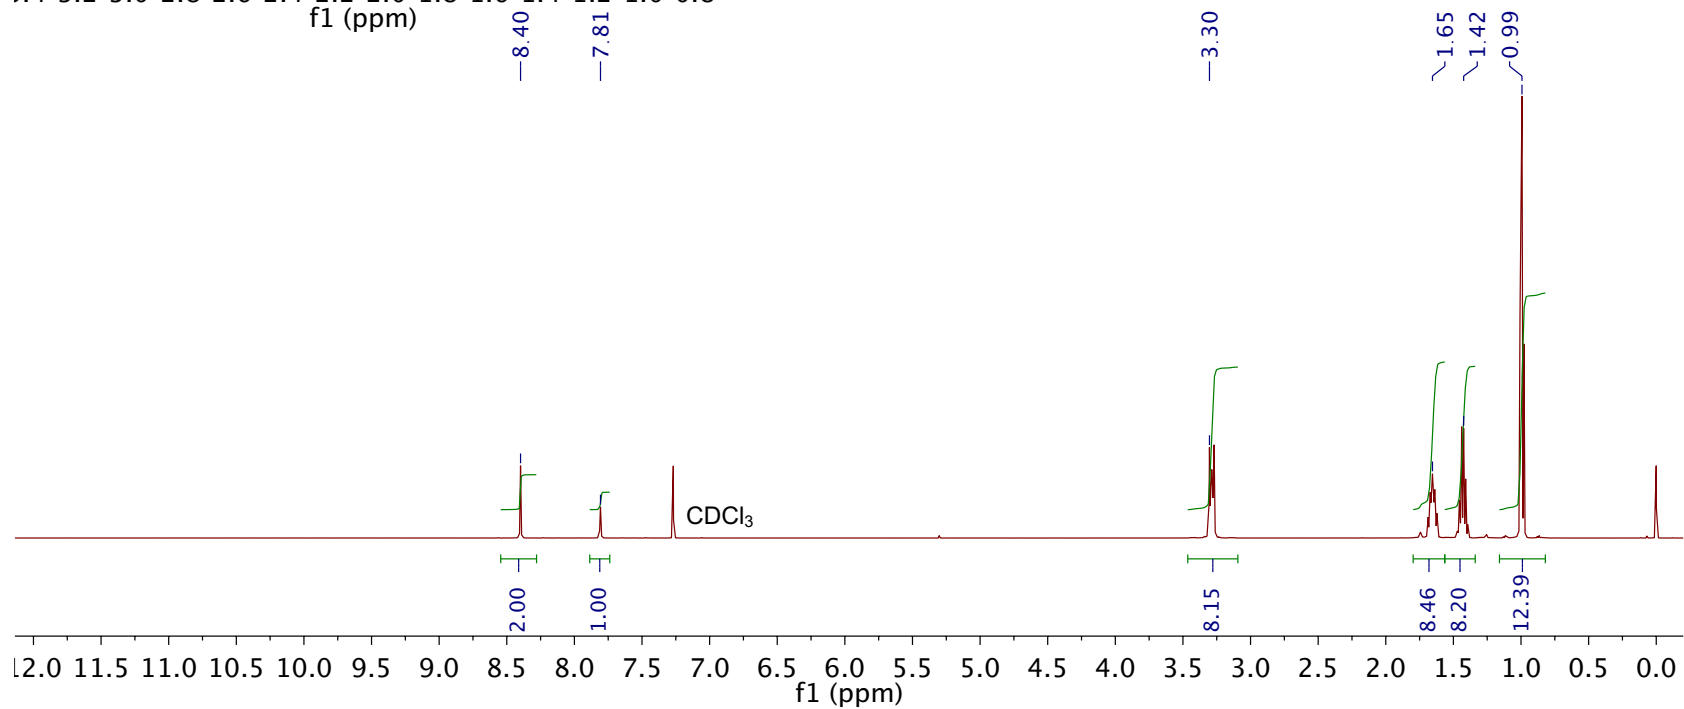



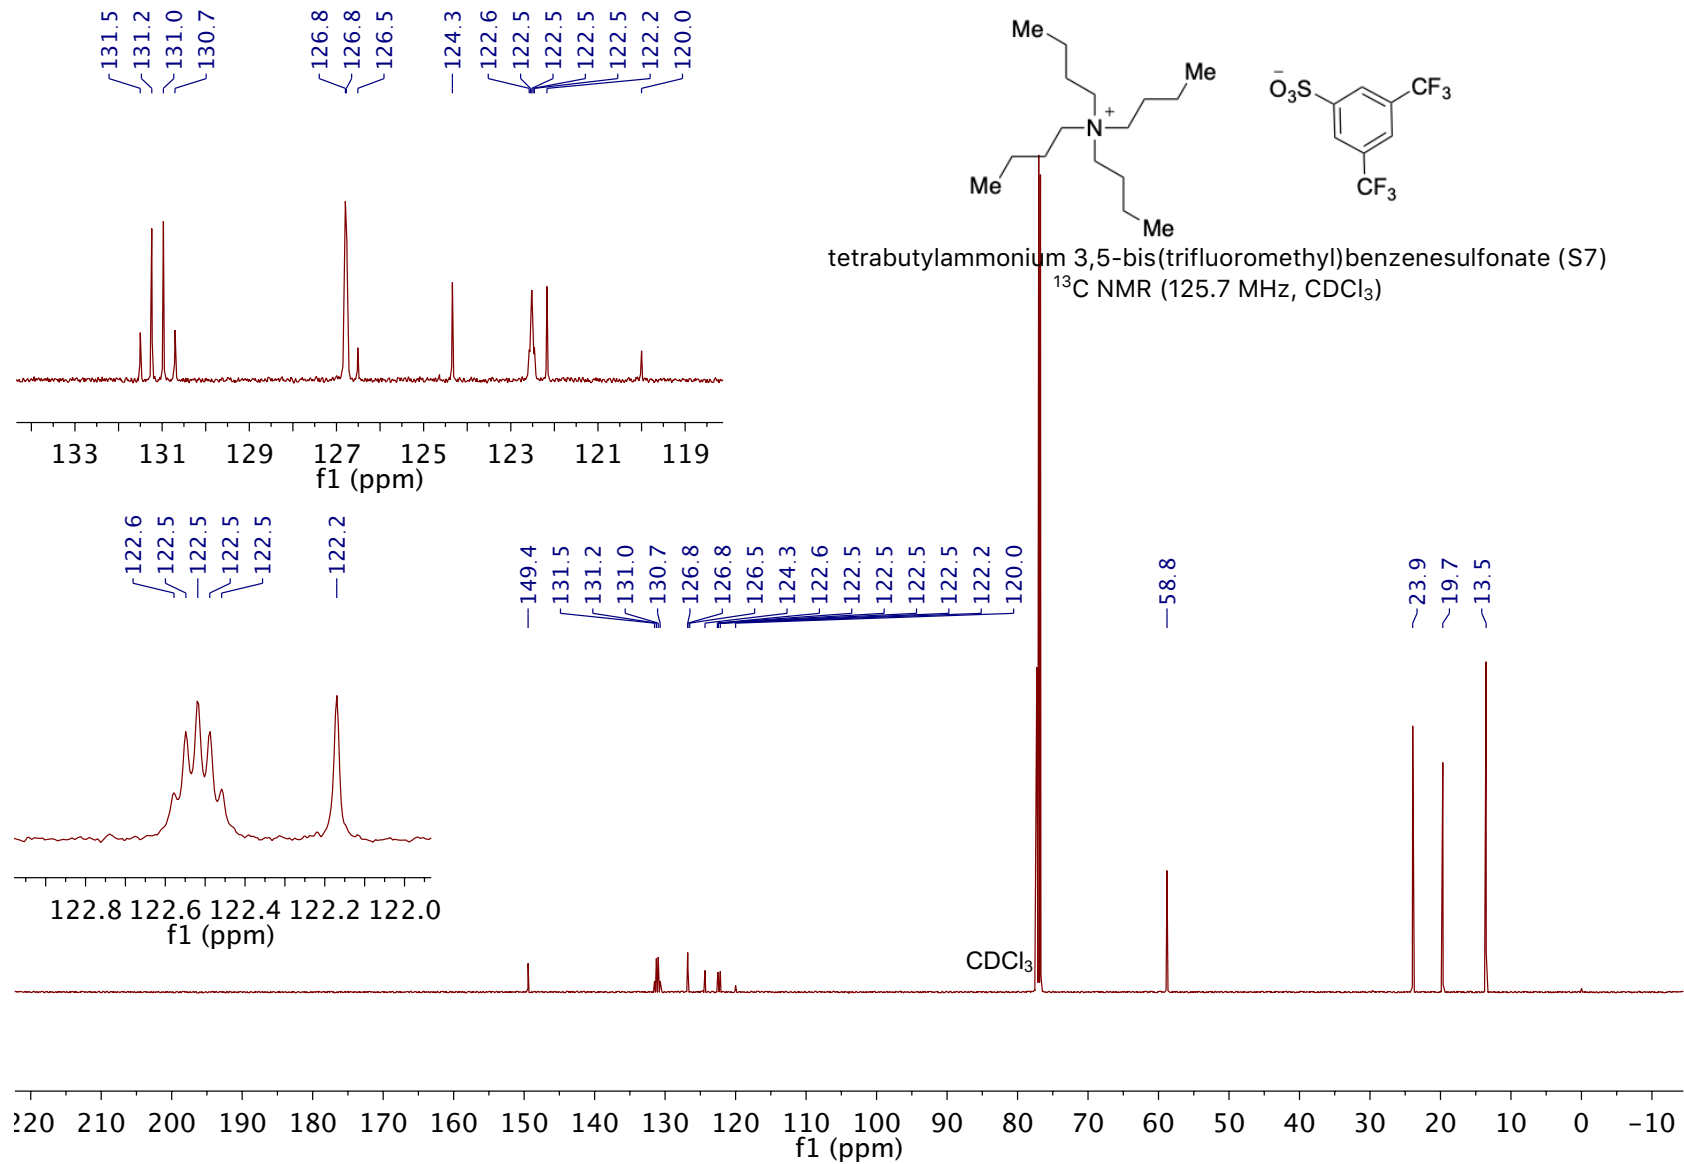

-62.8

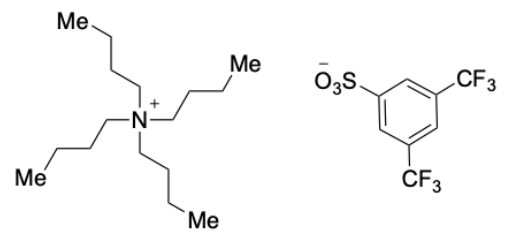

tetrabutylammonium 3,5-bis(trifluoromethyl)benzenesulfonate (S7)  
<sup>19</sup>F NMR (376.5 MHz, CDCl<sub>3</sub>)

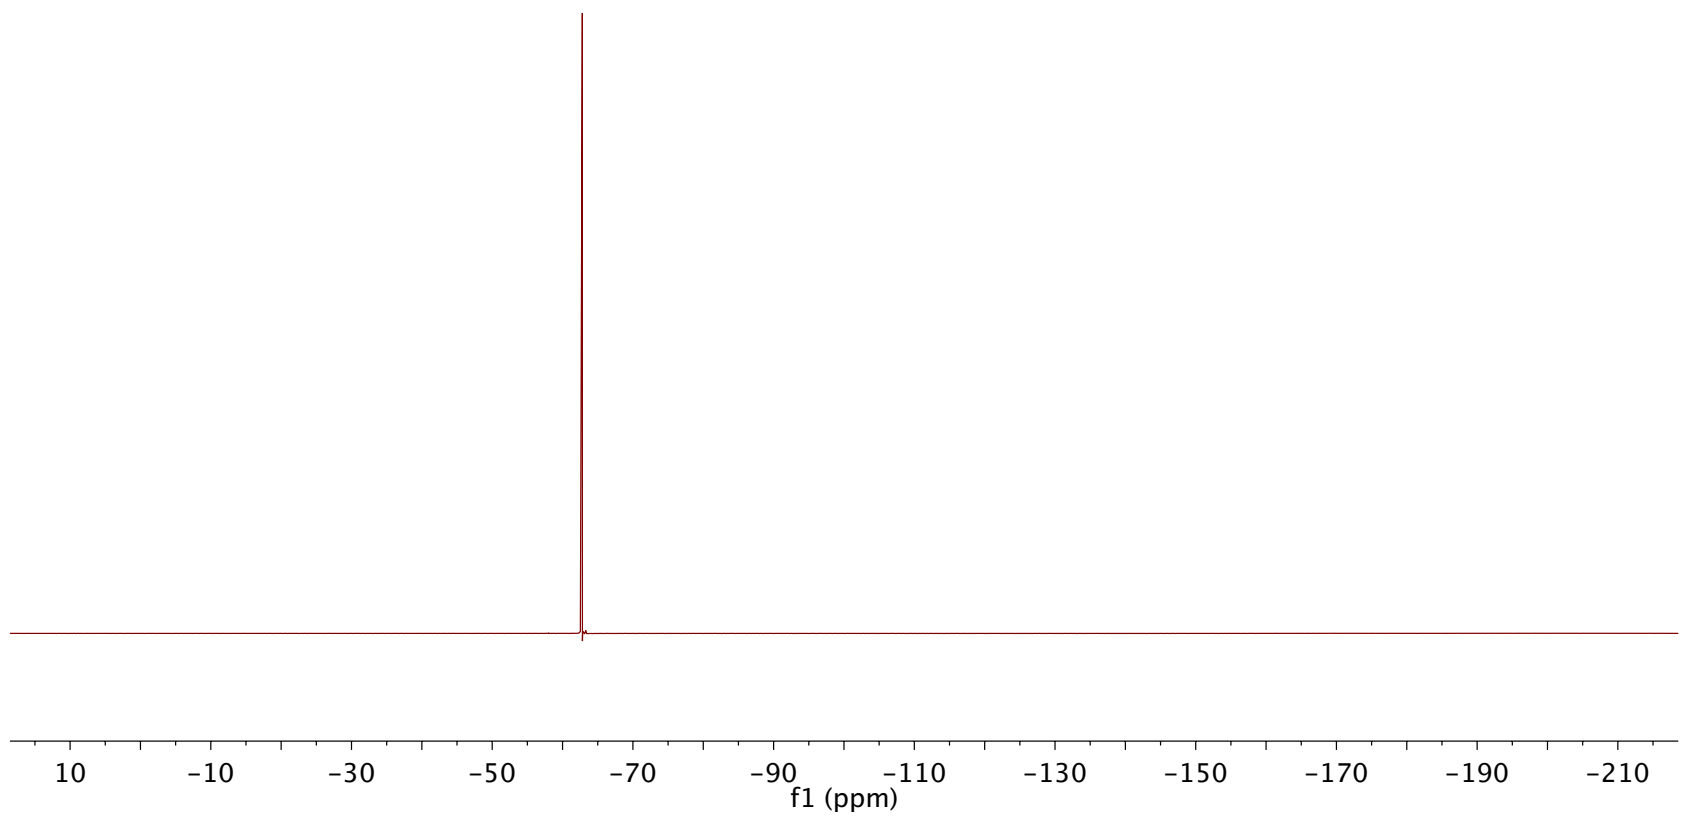

— 8.34  
— 8.06

— 4.84

— 3.31

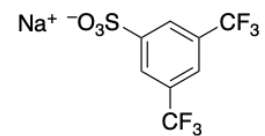

sodium 3,5-bis(trifluoromethyl)benzenesulfonate (S4)  
<sup>1</sup>H NMR (500.0 MHz, CD<sub>3</sub>OD)

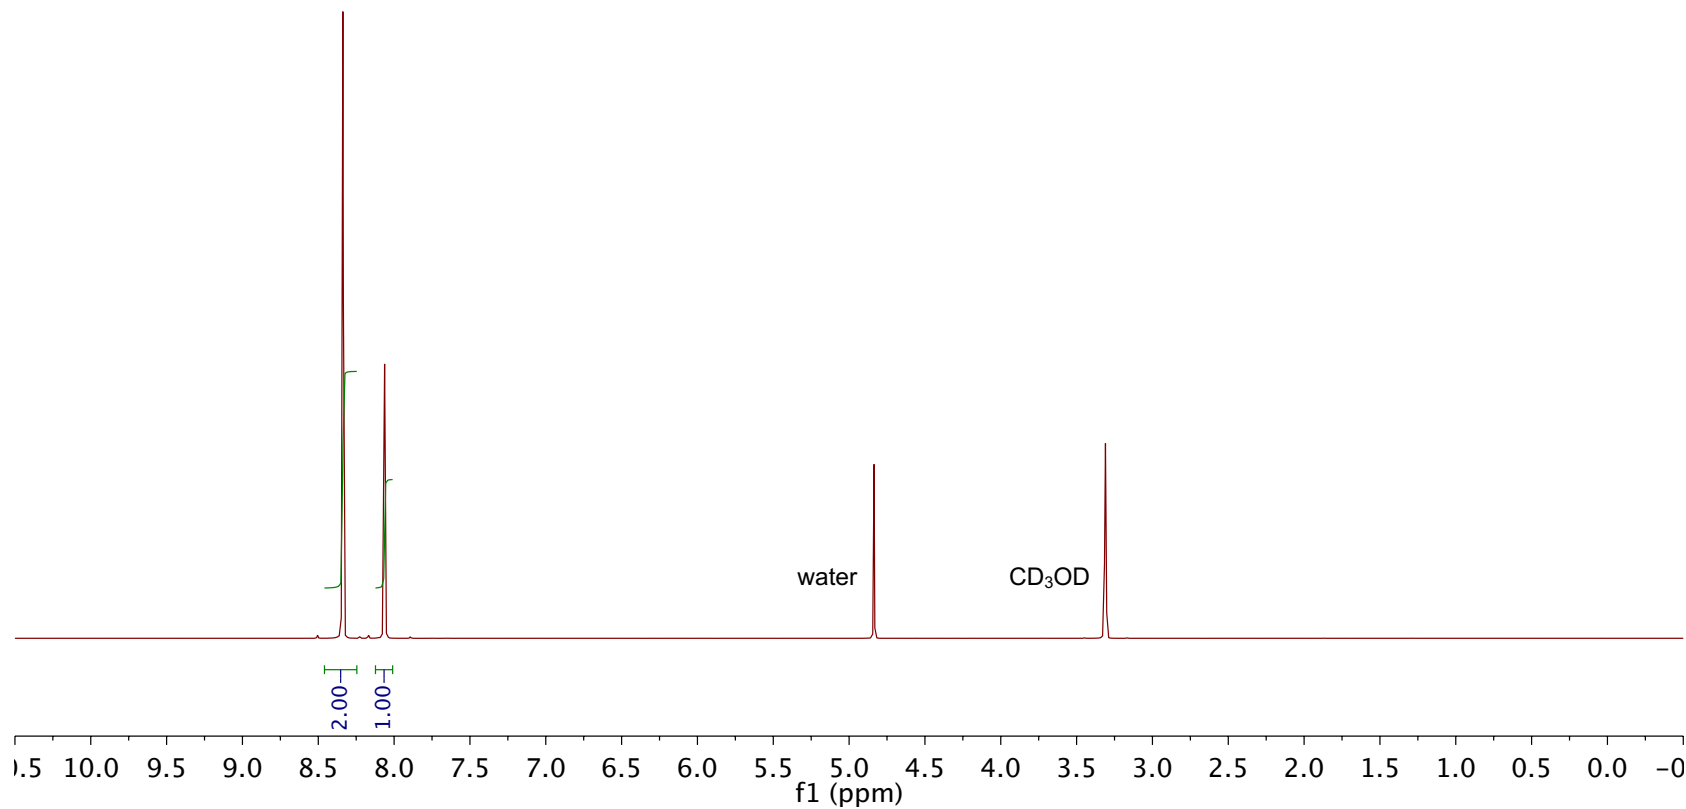

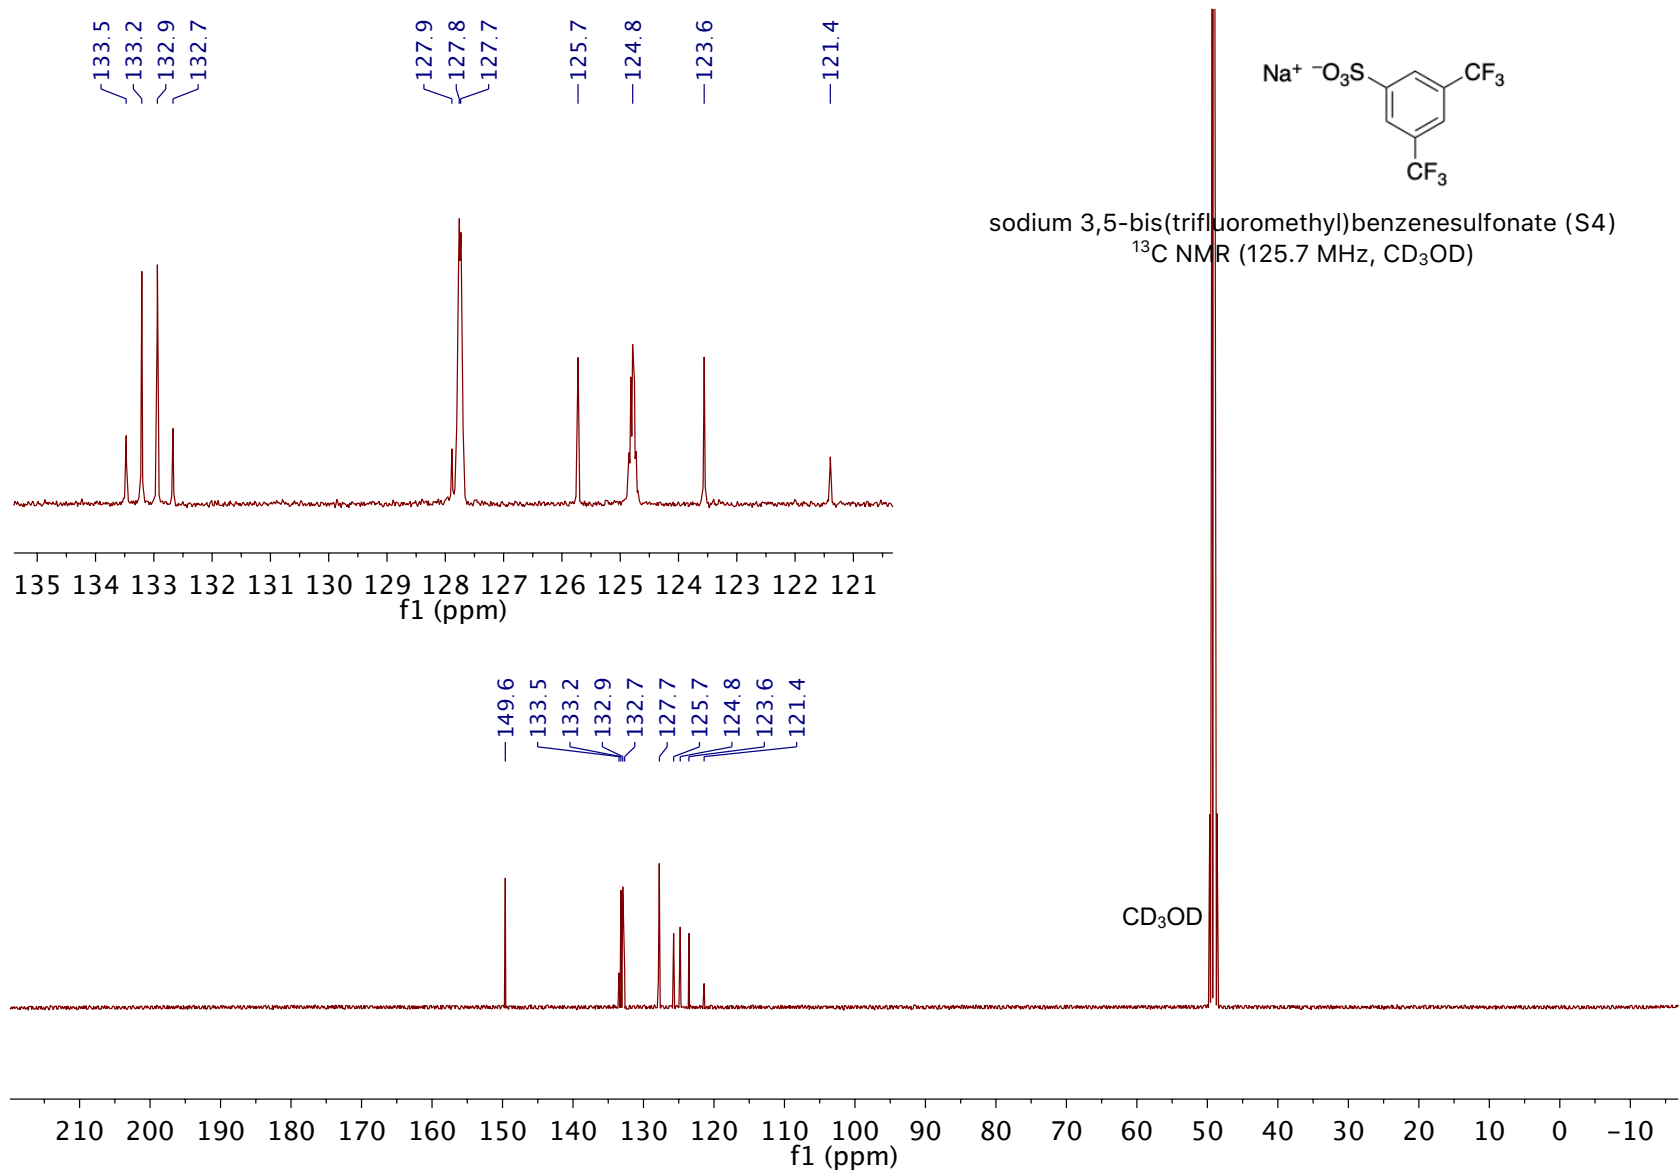

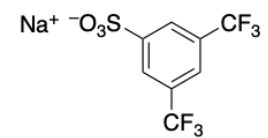

sodium 3,5-bis(trifluoromethyl)benzenesulfonate (S4)  
<sup>19</sup>F NMR (376.5 MHz, CD<sub>3</sub>OD)

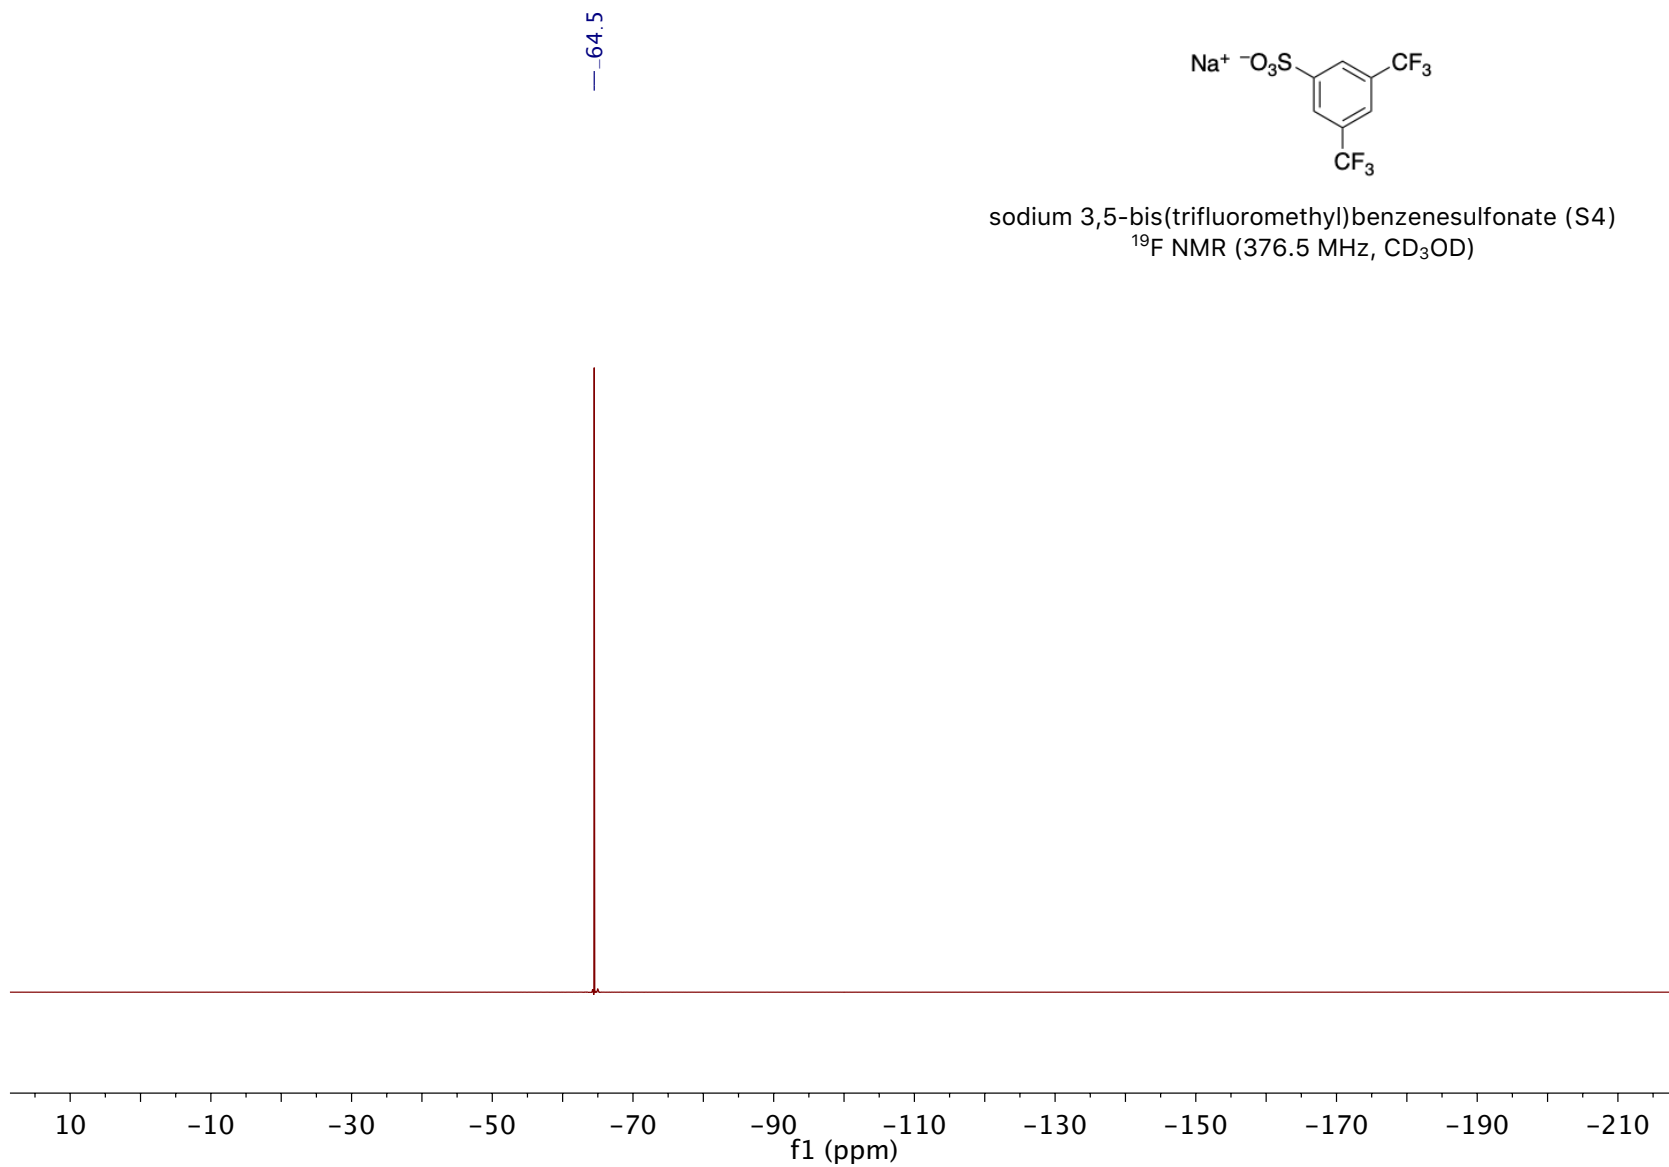

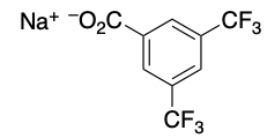

sodium 3,5-bis(trifluoromethyl)benzenecarboxylate (S5)  
<sup>1</sup>H NMR (500.0 MHz, CD<sub>3</sub>OD)

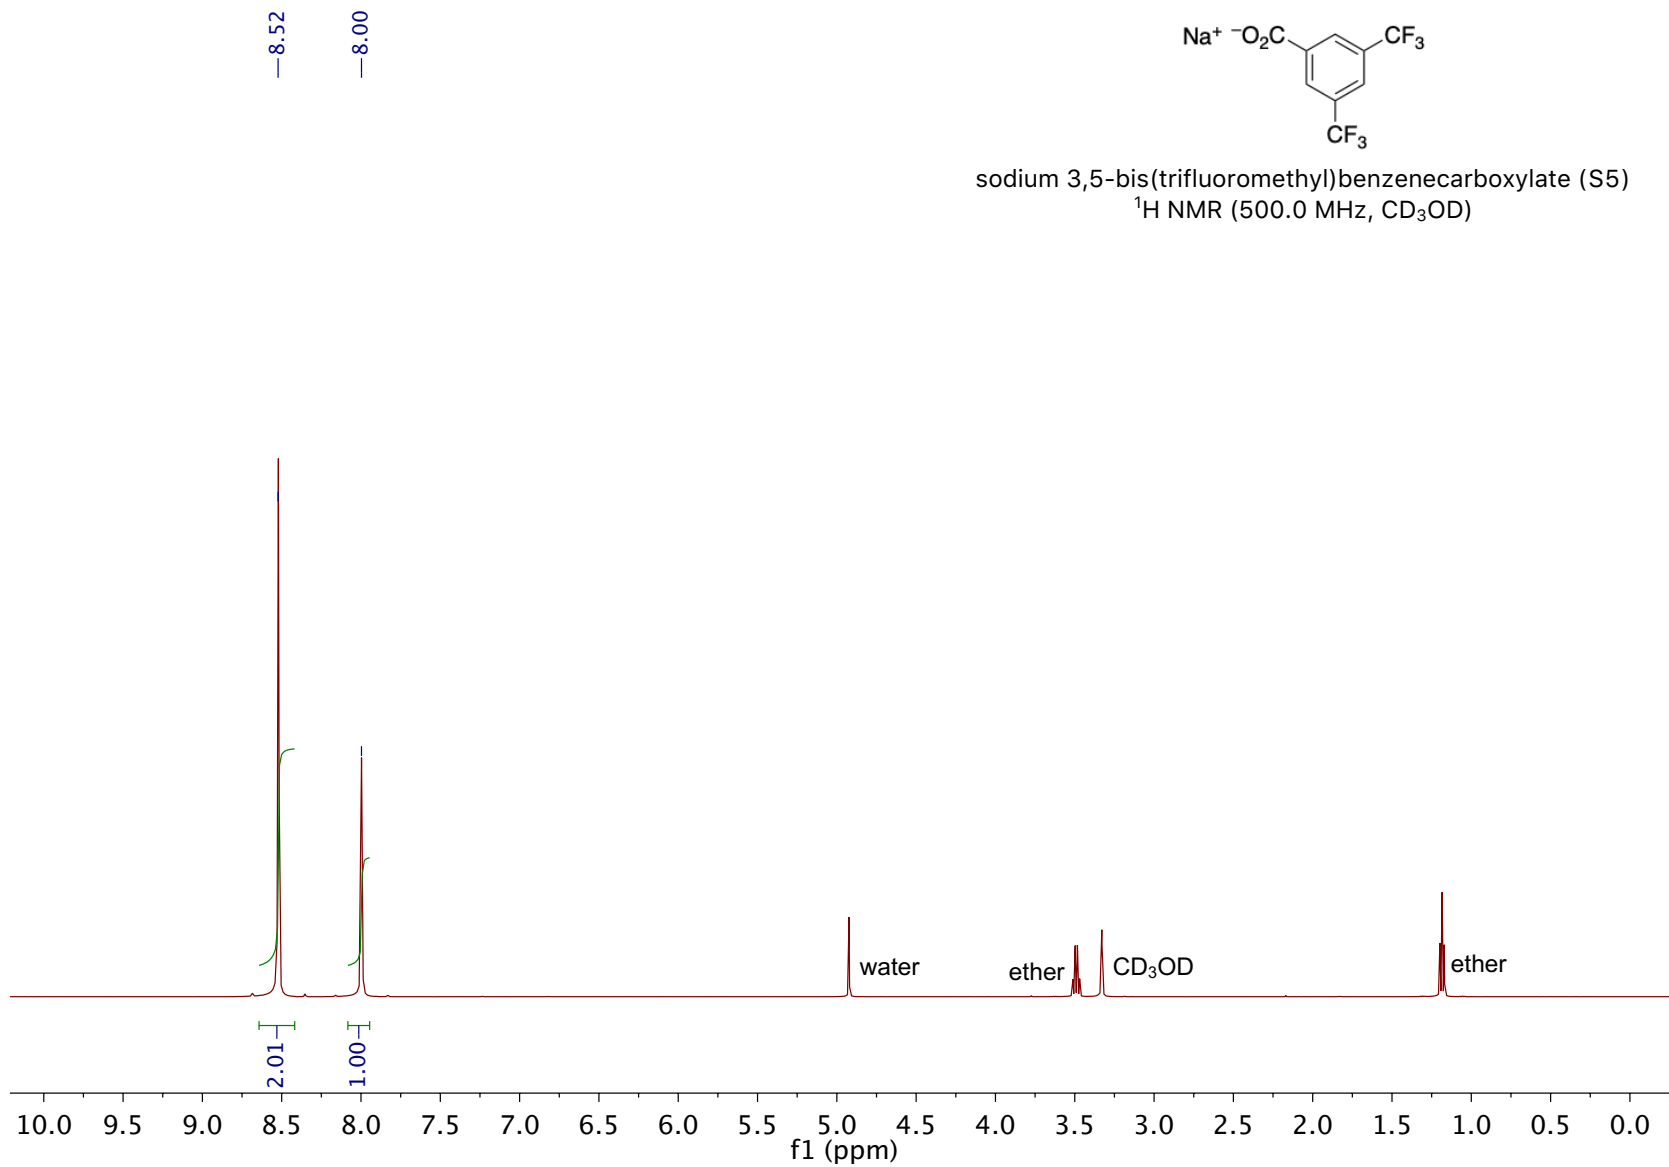

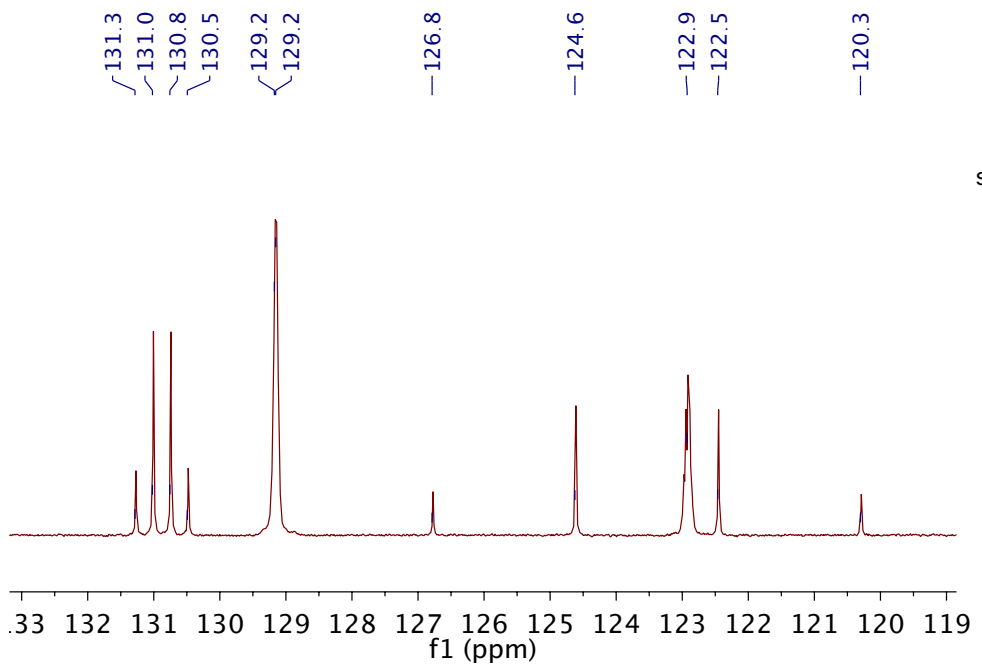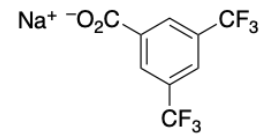

sodium 3,5-bis(trifluoromethyl)benzenecarboxylate (S5)  
<sup>13</sup>C NMR (125.7 MHz, CD<sub>3</sub>OD)

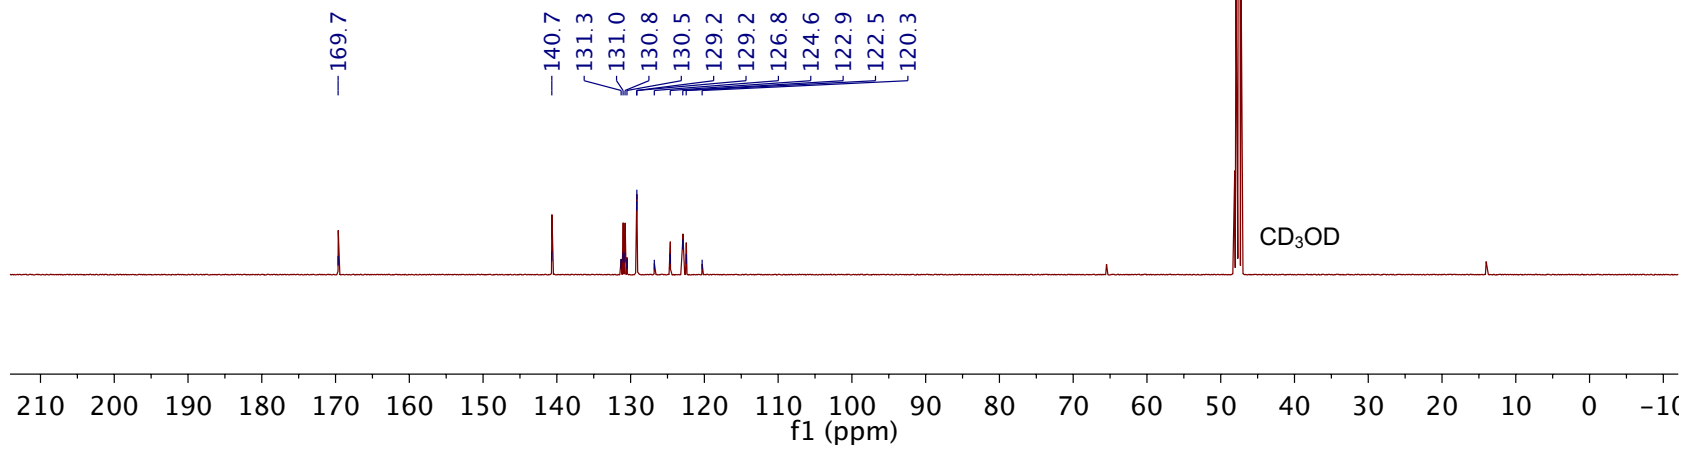

--64.3

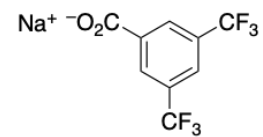

sodium 3,5-bis(trifluoromethyl)benzenecarboxylate (S5)  
<sup>19</sup>F NMR (376.5 MHz, CD<sub>3</sub>OD)

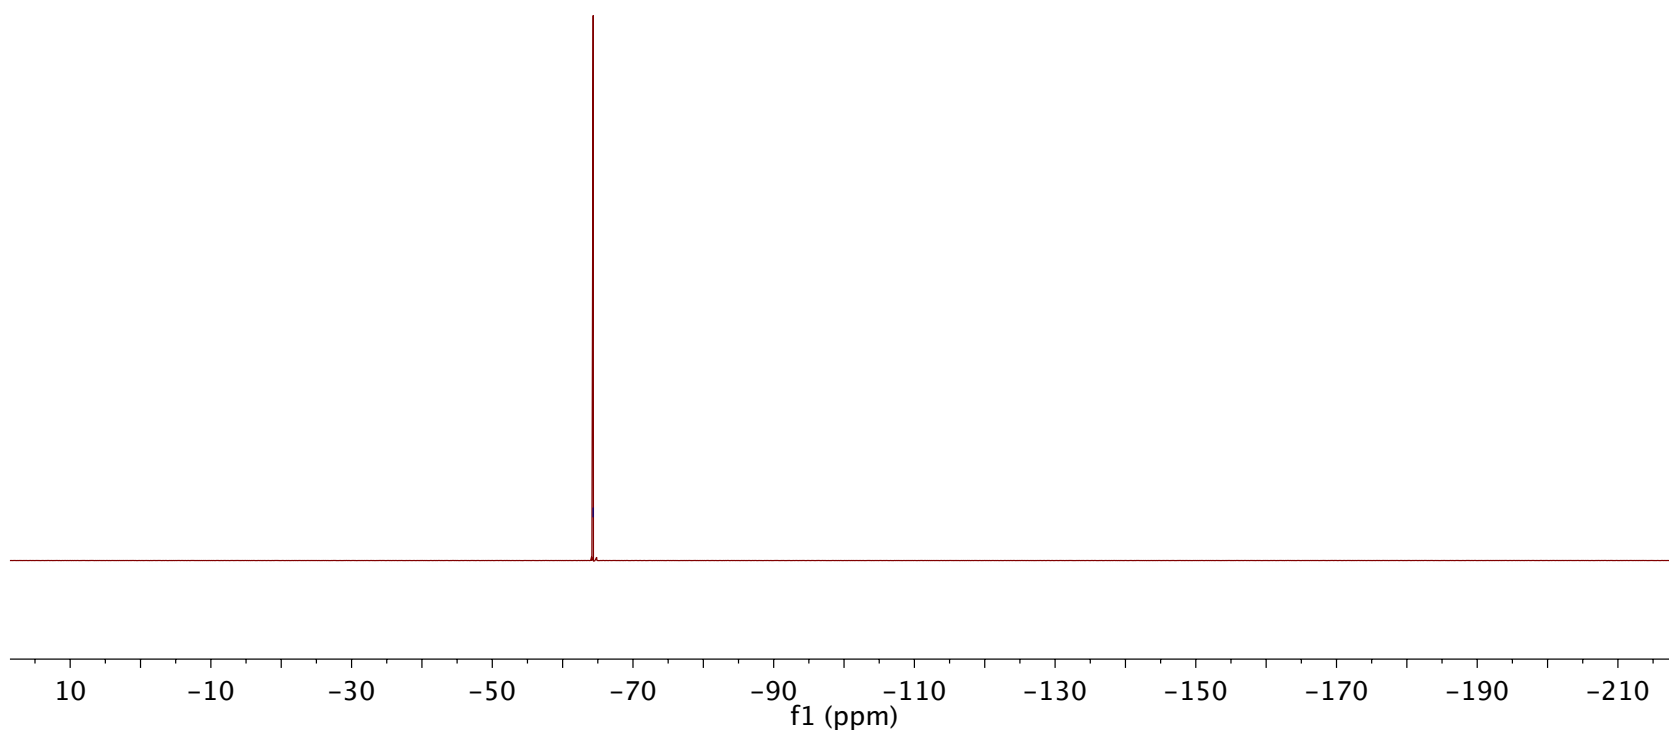

Supplement: NIHMS1027819-supplement-Supporting_Information.pdf [file NIHMS1027819-supplement-Supporting_Information.pdf]
